# Supplementary material for: Phylodynamic Analysis of Ebola Virus Disease Transmission in Sierra Leone
Source: MDPI journal article supplement (doi:10.3390/v11010071), 2019-01-16
Supplement: s1 [file s1]

**Table S1. Metadata of genomes generated in this study**

| <b>Sample ID</b>             | <b>COLLECTIO<br/>N DAY</b> | <b>COLLECTIO<br/>N MONTH</b> | <b>COLLECTIO<br/>N YEAR</b> | <b>DISTRICT</b> | <b>Town/Village/Suburb</b> | <b>Lineage</b> | <b>Genbank<br/>accession<br/>number</b> |
|------------------------------|----------------------------|------------------------------|-----------------------------|-----------------|----------------------------|----------------|-----------------------------------------|
| NICD0013_SLE_WR_2014-08-26   | 26                         | 8                            | 2014                        | WAR             | Waterloo                   | SL3.2.3        | MH60789<br>1                            |
| NICD0019_SLE_WR_2014-08-26   | 26                         | 8                            | 2014                        | WAR             | Waterloo                   | SL3.2.4        | MH60789<br>2                            |
| NICD0022_SLE_WUR_2014-08-26  | 26                         | 8                            | 2014                        | WAU             | Lumley                     | SL3.1.2        | MH60789<br>3                            |
| NICD0023_SLE_TONK_2014-08-26 | 26                         | 8                            | 2014                        | Tonkolili       | Magburaka                  | SL3.2          | MH60789<br>4                            |
| NICD0031_SLE_WUR_2014-08-26  | 26                         | 8                            | 2014                        | WAU             | Lumley                     | SL3.1.2        | MH60789<br>5                            |
| NICD0032_SLE_MOY_2014-08-27  | 27                         | 8                            | 2014                        | Moyamba         | Rotifunk                   | SL3.2.3        | MH60789<br>6                            |
| NICD0034_SLE_WUR_2014-08-26  | 26                         | 8                            | 2014                        | WAU             | Lumley                     | SL3.1.2        | MH60789<br>7                            |
| NICD0086_SLE_BOM_2014-08-29  | 29                         | 8                            | 2014                        | Bombali         | Makeni                     | SL3.2.5        | MH60789<br>8                            |
| NICD0104_SLE_WR_2014-08-30   | 30                         | 8                            | 2014                        | WAR             | Waterloo                   | SL3.2.2        | MH60789<br>9                            |
| NICD0108_SLE_PL_2014-08-30   | 30                         | 8                            | 2014                        | Port Loko       | Lunsar                     | SL3.2.2        | MH60790<br>0                            |
| NICD0110_SLE_PL_2014-08-30   | 30                         | 8                            | 2014                        | Port Loko       | Lunsar                     | SL3.2.3        | MH60790<br>1                            |
| NICD0129_SLE_BOM_2014-08-31  | 31                         | 8                            | 2014                        | Bombali         | Makeni                     | SL3.2.5        | MH60790<br>2                            |
| NICD0143_SLE_WUR_2014-08-31  | 31                         | 8                            | 2014                        | WAU             | Freetown                   | SL3.1.1        | MH60790<br>3                            |
| NICD0188_SLE_BOM_2014-09-03  | 3                          | 9                            | 2014                        | Bombali         | Makeni                     | SL3.2.5        | MH60790<br>4                            |
| NICD0190_SLE_BOM_2014-09-03  | 3                          | 9                            | 2014                        | Bombali         | Makeni                     | SL3.2.5        | MH60790<br>5                            |
| NICD0193_SLE_BOM_2014-09-03  | 3                          | 9                            | 2014                        | Bombali         | Makeni                     | SL3.2.5        | MH60790<br>6                            |

|                                  |    |   |      |           |              |         |          |
|----------------------------------|----|---|------|-----------|--------------|---------|----------|
| NICD0234_SLE_PL_2014-09-04       | 4  | 9 | 2014 | Port Loko | Feredugu     | SL3.2.5 | MH607907 |
| NICD0235_SLE_PL_2014-09-04       | 4  | 9 | 2014 | Port Loko | Lokomasama   | SL3.2.5 | MH607908 |
| NICD0256_SLE_BOM_2014-09-04      | 4  | 9 | 2014 | Bombali   | Makeni       | SL3.2.5 | MH607909 |
| NICD0257_SLE_BOM_2014-09-05      | 5  | 9 | 2014 | Bombali   | Makeni       | SL3.2.5 | MH607910 |
| NICD0264_SLE_BOM_2014-09-05      | 5  | 9 | 2014 | Bombali   | Makeni       | SL3.2.5 | MH607911 |
| NICD0298_SLE_PL_2014-09-05       | 5  | 9 | 2014 | Port Loko | Lunsar       | SL3.2.3 | MH607912 |
| NICD0299_SLE_PL_2014-09-05       | 5  | 9 | 2014 | Port Loko | Buya Romende | SL3.2.5 | MH607913 |
| NICD0338_SLE_PL_2014-09-08       | 8  | 9 | 2014 | Port Loko | Port Loko    | SL3.2.2 | MH607914 |
| NICD0369_SLE_BOM_2014-09-07      | 7  | 9 | 2014 | Bombali   | Makeni       | SL3.2.5 | MH607915 |
| NICD0393-Vero_SLE_WUR_2014-09-09 | 9  | 9 | 2014 | WAU       | Freetown     | SL3.1.2 | MH607916 |
| NICD0424_SLE_TONK_2014-09-10     | 10 | 9 | 2014 | Tonkolili | Magburaka    | SL3.2.2 | MH607917 |
| NICD0520_SLE_BOM_2014-09-11      | 11 | 9 | 2014 | Bombali   | Makeni       | SL3.2   | MH607918 |
| NICD0637_SLE_TONK_2014-09-16     | 16 | 9 | 2014 | Tonkolili | Yele         | SL3.2.5 | MH607919 |
| NICD0650_SLE_BOM_2014-09-15      | 15 | 9 | 2014 | Bombali   | Makeni       | SL3.2.5 | MH607920 |
| NICD0689_SLE_TONK_2014-09-17     | 17 | 9 | 2014 | Tonkolili | Magburaka    | SL3.2.1 | MH607921 |
| NICD0720-Vero_SLE_PL_2014-09-16  | 16 | 9 | 2014 | Port Loko | Lunsar       | SL3.2.2 | MH607922 |
| NICD0721_SLE_PL_2014-09-16       | 16 | 9 | 2014 | Port Loko | Lunsar       | SL3.2.2 | MH607923 |
| NICD0782_SLE_BOM_2014-09-17      | 17 | 9 | 2014 | Bombali   | Makeni       | SL3.2.5 | MH607924 |
| NICD0787_SLE_BOM_2014-09-17      | 17 | 9 | 2014 | Bombali   | Makeni       | SL3.2.1 | MH607925 |

|                                  |    |   |      |           |              |         |          |
|----------------------------------|----|---|------|-----------|--------------|---------|----------|
| NICD0821_SLE_WR_2014-09-20       | 20 | 9 | 2014 | WAR       | Waterloo     | SL3.1.2 | MH607926 |
| NICD0856-Vero_SLE_WR_2014-09-20  | 20 | 9 | 2014 | WAR       | Waterloo     | SL3.2.3 | MH607927 |
| NICD0878_SLE_PL_2014-09-20       | 20 | 9 | 2014 | Port Loko | Lunsar       | SL3.2.2 | MH607928 |
| NICD0894_SLE_PL_2014-09-20       | 20 | 9 | 2014 | Port Loko | Lunsar       | SL3.2.2 | MH607929 |
| NICD0899_SLE_PL_2014-09-20       | 20 | 9 | 2014 | Port Loko | Masuba       | SL3.2.2 | MH607930 |
| NICD0900_SLE_PL_2014-09-20       | 20 | 9 | 2014 | Port Loko | Lunsar       | SL3.2.2 | MH607931 |
| NICD0905_SLE_TONK_2014-09-20     | 20 | 9 | 2014 | Tonkolili | Magburaka    | SL3.2.1 | MH607932 |
| NICD0908_SLE_TONK_2014-09-20     | 20 | 9 | 2014 | Tonkolili | Magburaka    | SL3.2.1 | MH607933 |
| NICD0911_SLE_TONK_2014-09-20     | 20 | 9 | 2014 | Tonkolili | Magburaka    | SL3.2.1 | MH607934 |
| NICD0919_SLE_TONK_2014-09-19     | 19 | 9 | 2014 | Tonkolili | Magburaka    | SL3.2.5 | MH607935 |
| NICD0964_SLE_TONK_2014-09-21     | 21 | 9 | 2014 | Tonkolili | Magburaka    | SL3.2.1 | MH607936 |
| NICD0983_SLE_WUR_2014-09-22      | 22 | 9 | 2014 | WAU       | Freetown     | SL3.1.2 | MH607937 |
| NICD0986-Vero_SLE_WUR_2014-09-22 | 22 | 9 | 2014 | WAU       | Freetown     | SL3.1.2 | MH607938 |
| NICD1016_SLE_PL_2014-09-21       | 21 | 9 | 2014 | Port Loko | Buya Romende | SL3.2.5 | MH607939 |
| NICD1043_SLE_PL_2014-09-22       | 22 | 9 | 2014 | Port Loko | Port Loko    | SL3.2.3 | MH607940 |
| NICD1049_SLE_PL_2014-09-21       | 21 | 9 | 2014 | Port Loko | Port Loko    | SL3.2.2 | MH607941 |
| NICD1051_SLE_PL_2014-09-21       | 21 | 9 | 2014 | Port Loko | Lungi        | SL3.2.3 | MH607942 |
| NICD1079_SLE_BOM_2014-09-20      | 20 | 9 | 2014 | Bombali   | Makeni       | SL3.2.5 | MH607943 |
| NICD1081_SLE_BOM_2014-09-20      | 20 | 9 | 2014 | Bombali   | Makeni       | SL3.2.1 | MH607944 |

|                                  |    |   |      |           |                  |         |          |
|----------------------------------|----|---|------|-----------|------------------|---------|----------|
| NICD1089-Vero_SLE_BOM_2014-09-20 | 20 | 9 | 2014 | Bombali   | Makeni           | SL3.2.5 | MH607945 |
| NICD1091_SLE_BOM_2014-09-20      | 20 | 9 | 2014 | Bombali   | Makeni           | SL3.2.1 | MH607946 |
| NICD1092_SLE_BOM_2014-09-20      | 20 | 9 | 2014 | Bombali   | Makeni           | SL3.2.1 | MH607947 |
| NICD1100_SLE_BOM_2014-09-21      | 21 | 9 | 2014 | Bombali   | Makeni           | SL3.2.5 | MH607948 |
| NICD1105_SLE_BOM_2014-09-21      | 21 | 9 | 2014 | Bombali   | Makeni           | SL3.2.1 | MH607949 |
| NICD1109_SLE_BOM_2014-09-19      | 19 | 9 | 2014 | Bombali   | Makeni           | SL3.2.1 | MH607950 |
| NICD1113_SLE_BOM_2014-09-19      | 19 | 9 | 2014 | Bombali   | Makeni           | SL3.1.2 | MH607951 |
| NICD1136_SLE_WR_2014-09-23       | 23 | 9 | 2014 | WAR       | Waterloo         | SL3.2.1 | MH607952 |
| NICD1142_SLE_PL_2014-09-22       | 22 | 9 | 2014 | Port Loko | Mamamah (Mamana) | SL3.2.1 | MH607953 |
| NICD1143_SLE_PL_2014-09-23       | 23 | 9 | 2014 | Port Loko | Port Loko        | SL3.2.1 | MH607954 |
| NICD1147_SLE_PL_2014-09-22       | 22 | 9 | 2014 | Port Loko | Port Loko        | SL3.2.5 | MH607955 |
| NICD1148_SLE_PL_2014-09-22       | 22 | 9 | 2014 | Port Loko | Port Loko        | SL3.2.5 | MH607956 |
| NICD1156_SLE_PL_2014-09-22       | 22 | 9 | 2014 | Port Loko | Kalangbani       | SL3.2.5 | MH607957 |
| NICD1167_SLE_PL_2014-09-22       | 22 | 9 | 2014 | Port Loko | Port Loko        | SL3.2.5 | MH607958 |
| NICD1201_SLE_TONK_2014-09-20     | 20 | 9 | 2014 | Tonkolili | Yonibana         | SL3.2.5 | MH607959 |
| NICD1209-Vero_SLE_WUR_2014-09-23 | 23 | 9 | 2014 | WAU       | Freetown         | SL3.1.2 | MH607960 |
| NICD1227_SLE_BOM_2014-09-22      | 22 | 9 | 2014 | Bombali   | Makeni           | SL3.2.1 | MH607961 |
| NICD1256-Vero_SLE_BOM_2014-09-22 | 22 | 9 | 2014 | Bombali   | Makeni           | SL3.2.1 | MH607962 |
| NICD1261_SLE_BOM_2014-09-22      | 22 | 9 | 2014 | Bombali   | Makeni           | SL3.2.1 | MH607963 |

|                                      |    |    |      |           |           |         |              |
|--------------------------------------|----|----|------|-----------|-----------|---------|--------------|
| NICD1272-<br>Vero_SLE_BOM_2014-09-22 | 22 | 9  | 2014 | Bombali   | Makeni    | SL3.2.1 | MH60796<br>4 |
| NICD1275_SLE_WR_2014-09-25           | 25 | 9  | 2014 | WAR       | Waterloo  | SL3.1.1 | MH60796<br>5 |
| NICD1317_SLE_BOM_2014-09-24          | 24 | 9  | 2014 | Bombali   | Makeni    | SL3.2.5 | MH60796<br>6 |
| NICD1329-<br>Vero_SLE_BOM_2014-09-24 | 24 | 9  | 2014 | Bombali   | Makeni    | SL3.2.1 | MH60796<br>7 |
| NICD1396_SLE_PL_2014-09-25           | 25 | 9  | 2014 | Port Loko | Port Loko | SL3.2.2 | MH60796<br>8 |
| NICD1422_SLE_PL_2014-09-26           | 26 | 9  | 2014 | Port Loko | Port Loko | SL3.2.5 | MH60796<br>9 |
| NICD1430_SLE_PL_2014-09-26           | 26 | 9  | 2014 | Port Loko | Port Loko | SL3.2.5 | MH60797<br>0 |
| NICD1458_SLE_WUR_2014-09-29          | 29 | 9  | 2014 | WAU       | Freetown  | SL3.1.2 | MH60797<br>1 |
| NICD1514_SLE_PL_2014-09-28           | 28 | 9  | 2014 | Port Loko | Port Loko | SL3.2.5 | MH60797<br>2 |
| NICD1526_SLE_WR_2014-10-01           | 1  | 10 | 2014 | WAR       | Waterloo  | SL3.2.4 | MH60797<br>3 |
| NICD1662-<br>Vero_SLE_BOM_2014-10-01 | 1  | 10 | 2014 | Bombali   | Makeni    | SL3.2.5 | MH60797<br>4 |
| NICD1972-<br>Vero_SLE_WUR_2014-10-09 | 9  | 10 | 2014 | WAU       | Freetown  | SL3.2.4 | MH60797<br>5 |
| NICD2031-<br>Vero_SLE_WUR_2014-10-11 | 11 | 10 | 2014 | WAU       | Freetown  | SL3.1.2 | MH60797<br>6 |
| NICD2032-<br>Vero_SLE_WUR_2014-10-11 | 11 | 10 | 2014 | WAU       | Freetown  | SL3.1.2 | MH60797<br>7 |
| NICD2118_SLE_WUR_2014-10-11          | 11 | 10 | 2014 | WAU       | Freetown  | SL3.2.4 | MH60797<br>8 |
| NICD2219_SLE_WUR_2014-10-14          | 14 | 10 | 2014 | WAU       | Freetown  | SL3.2.5 | MH60797<br>9 |
| NICD2308_SLE_WR_2014-10-16           | 16 | 10 | 2014 | WAR       | Goderich  | SL3.2.5 | MH60798<br>0 |
| NICD2310_SLE_WR_2014-10-16           | 16 | 10 | 2014 | WAR       | Goderich  | SL3.2.5 | MH60798<br>1 |
| NICD2494_SLE_WR_2014-10-23           | 23 | 10 | 2014 | WAR       | Goderich  | SL3.2.5 | MH60798<br>2 |

|                                  |    |    |      |           |           |         |          |
|----------------------------------|----|----|------|-----------|-----------|---------|----------|
| NICD2521-swab_SLE_WUR_2014-10-23 | 23 | 10 | 2014 | WAU       | Freetown  | SL3.2.3 | MH607983 |
| NICD2538_SLE_WUR_2014-10-22      | 22 | 10 | 2014 | WAU       | Freetown  | SL3.1.2 | MH607984 |
| NICD2540-Vero_SLE_WUR_2014-10-22 | 22 | 10 | 2014 | WAU       | Freetown  | SL3.2.4 | MH607985 |
| NICD2541_SLE_WUR_2014-10-22      | 22 | 10 | 2014 | WAU       | Freetown  | SL3.1.2 | MH607986 |
| NICD2542_SLE_WUR_2014-10-22      | 22 | 10 | 2014 | WAU       | Freetown  | SL3.2.4 | MH607987 |
| NICD2589_SLE_WR_2014-10-24       | 24 | 10 | 2014 | WAR       | Waterloo  | SL3.2.5 | MH607988 |
| NICD2748_SLE_KMB_2014-11-06      | 6  | 11 | 2014 | Kambia    | Mambolo   | SL3.1.2 | MH607989 |
| NICD2749_SLE_KMB_2014-11-06      | 6  | 11 | 2014 | Kambia    | Kambia    | SL3.2.4 | MH607990 |
| NICD2763-Vero_SLE_PL_2014-11-06  | 6  | 11 | 2014 | Port Loko | Mabamba   | SL3.1.1 | MH607991 |
| NICD2965-Vero_SLE_PL_2014-11-10  | 10 | 11 | 2014 | Port Loko | Lunsar    | SL3.2.3 | MH607992 |
| NICD2974-swab_SLE_PL_2014-11-08  | 8  | 11 | 2014 | Port Loko | Makare    | SL3.2.2 | MH607993 |
| NICD3031_SLE_PL_2014-11-11       | 11 | 11 | 2014 | Port Loko | Port Loko | SL3.1.2 | MH607994 |
| NICD3087_SLE_WUR_2014-11-13      | 13 | 11 | 2014 | WAU       | Freetown  | SL3.1.2 | MH607995 |
| NICD3089_SLE_PL_2014-11-12       | 12 | 11 | 2014 | Port Loko | Port Loko | SL3.1.2 | MH607996 |
| NICD3097_SLE_PL_2014-11-12       | 12 | 11 | 2014 | Port Loko | Masiaka   | SL3.2.2 | MH607997 |
| NICD3208-Vero_SLE_WR_2014-11-14  | 14 | 11 | 2014 | WAR       | Goderich  | SL3.2.1 | MH607998 |
| NICD3294_SLE_WR_2014-11-14       | 14 | 11 | 2014 | WAR       | Goderich  | SL3.2.1 | MH607999 |
| NICD3304-swab_SLE_WUR_2014-11-15 | 15 | 11 | 2014 | WAU       | Freetown  | SL3.2.5 | MH608000 |
| NICD3335_SLE_WR_2014-11-16       | 16 | 11 | 2014 | WAR       | Waterloo  | SL3.1.2 | MH608001 |

|                                  |    |    |      |     |          |         |          |
|----------------------------------|----|----|------|-----|----------|---------|----------|
| NICD3341_SLE_WUR_2014-11-16      | 16 | 11 | 2014 | WAU | Freetown | SL3.2.5 | MH608002 |
| NICD3420_SLE_WUR_2014-11-17      | 17 | 11 | 2014 | WAU | Freetown | SL3.2.5 | MH608003 |
| NICD3465-swab_SLE_WUR_2014-11-18 | 18 | 11 | 2014 | WAU | Freetown | SL3.2.4 | MH608004 |
| NICD3483-Vero_SLE_WUR_2014-11-18 | 18 | 11 | 2014 | WAU | Freetown | SL3.1.2 | MH608005 |
| NICD3577_SLE_WR_2014-11-20       | 20 | 11 | 2014 | WAR | Waterloo | SL3.1.1 | MH608006 |
| NICD3596_SLE_WUR_2014-11-21      | 21 | 11 | 2014 | WAU | Freetown | SL3.1.2 | MH608007 |
| NICD3608-Vero_SLE_WR_2014-11-21  | 21 | 11 | 2014 | WAR | Goderich | SL3.2.1 | MH608008 |
| NICD3666_SLE_WR_2014-11-22       | 22 | 11 | 2014 | WAR | Waterloo | SL3.2.4 | MH608009 |
| NICD3670_SLE_WR_2014-11-22       | 22 | 11 | 2014 | WAR | Rokel    | SL3.2.3 | MH608010 |
| NICD3687-Vero_SLE_WUR_2014-11-23 | 23 | 11 | 2014 | WAU | Freetown | SL3.2.4 | MH608011 |
| NICD3693-Vero_SLE_WR_2014-11-23  | 23 | 11 | 2014 | WAR | Goderich | SL3.2.1 | MH608012 |
| NICD3707_SLE_WUR_2014-11-24      | 24 | 11 | 2014 | WAU | Freetown | SL3.1.2 | MH608013 |
| NICD3752_SLE_WR_2014-11-24       | 24 | 11 | 2014 | WAR | Waterloo | SL3.2.4 | MH608014 |
| NICD3753_SLE_WR_2014-11-24       | 24 | 11 | 2014 | WAR | Goderich | SL3.2.4 | MH608015 |
| NICD3820_SLE_WUR_2014-11-25      | 25 | 11 | 2014 | WAU | Freetown | SL3.1.2 | MH608016 |
| NICD3823_SLE_WR_2014-11-25       | 25 | 11 | 2014 | WAR | Rokel    | SL3.1.2 | MH608017 |
| NICD3824_SLE_WR_2014-11-25       | 25 | 11 | 2014 | WAR | Goderich | SL3.2.4 | MH608018 |
| NICD3925_SLE_WUR_2014-11-27      | 27 | 11 | 2014 | WAU | Freetown | SL3.1.2 | MH608019 |
| NICD3926_SLE_WUR_2014-11-27      | 27 | 11 | 2014 | WAU | Freetown | SL3.1.1 | MH608020 |

|                                  |    |    |      |     |              |         |          |
|----------------------------------|----|----|------|-----|--------------|---------|----------|
| NICD3928_SLE_WUR_2014-11-26      | 26 | 11 | 2014 | WAU | Freetown     | SL3.1.2 | MH608021 |
| NICD3932_SLE_WUR_2014-11-26      | 26 | 11 | 2014 | WAU | Freetown     | SL3.1.2 | MH608022 |
| NICD3937_SLE_WUR_2014-11-26      | 26 | 11 | 2014 | WAU | Freetown     | SL3.1.2 | MH608023 |
| NICD3944_SLE_WUR_2014-11-26      | 26 | 11 | 2014 | WAU | Freetown     | SL3.2.4 | MH608024 |
| NICD3954_SLE_WUR_2014-11-26      | 26 | 11 | 2014 | WAU | Freetown     | SL3.2.4 | MH608025 |
| NICD4024-Vero_SLE_WUR_2014-11-29 | 29 | 11 | 2014 | WAU | Freetown     | SL3.2.4 | MH608026 |
| NICD4025-Vero_SLE_WUR_2014-11-29 | 29 | 11 | 2014 | WAU | Freetown     | SL3.1.2 | MH608027 |
| NICD4027-Vero_SLE_WUR_2014-11-29 | 29 | 11 | 2014 | WAU | Freetown     | SL3.2.4 | MH608028 |
| NICD4029-Vero_SLE_WUR_2014-11-29 | 29 | 11 | 2014 | WAU | Freetown     | SL3.2.4 | MH608029 |
| NICD4030-Vero_SLE_WR_2014-11-29  | 29 | 11 | 2014 | WAR | Goderich     | SL3.2.5 | MH608030 |
| NICD4041-Vero_SLE_WUR_2014-11-29 | 29 | 11 | 2014 | WAU | Lumley       | SL3.2.4 | MH608031 |
| NICD4055_SLE_WUR_2014-11-28      | 28 | 11 | 2014 | WAU | Freetown     | SL3.1.2 | MH608032 |
| NICD4064-swab_SLE_WUR_2014-11-29 | 29 | 11 | 2014 | WAU | Freetown     | SL3.1.2 | MH608033 |
| NICD4072-swab_SLE_WUR_2014-11-30 | 30 | 11 | 2014 | WAU | Freetown     | SL3.2.5 | MH608034 |
| NICD4113_SLE_WUR_2014-12-01      | 1  | 12 | 2014 | WAU | Freetown     | SL3.2.5 | MH608035 |
| NICD4122_SLE_WR_2014-12-02       | 2  | 12 | 2014 | WAR | Songo        | SL3.2.4 | MH608036 |
| NICD4125_SLE_WR_2014-12-02       | 2  | 12 | 2014 | WAR | Hill Station | SL3.2.4 | MH608037 |
| NICD4167_SLE_WUR_2014-12-02      | 2  | 12 | 2014 | WAU | Freetown     | SL3.2.4 | MH608038 |
| NICD4279-Vero_SLE_WUR_2014-12-05 | 5  | 12 | 2014 | WAU | Freetown     | SL3.1.2 | MH608039 |



|                                  |    |    |      |     |          |         |          |
|----------------------------------|----|----|------|-----|----------|---------|----------|
| NICD4325_SLE_WR_2014-12-05       | 5  | 12 | 2014 | WAR | Waterloo | SL3.2.4 | MH608040 |
| NICD4329_SLE_WUR_2014-12-05      | 5  | 12 | 2014 | WAU | Freetown | SL3.2.5 | MH608041 |
| NICD4356_SLE_WUR_2014-12-06      | 6  | 12 | 2014 | WAU | Freetown | SL3.2.5 | MH608042 |
| NICD4361-Vero_SLE_WR_2014-12-06  | 6  | 12 | 2014 | WAR | Waterloo | SL3.2.4 | MH608043 |
| NICD4430_SLE_WUR_2014-12-06      | 6  | 12 | 2014 | WAU | Freetown | SL3.2.4 | MH608044 |
| NICD4513-Vero_SLE_WUR_2014-12-09 | 9  | 12 | 2014 | WAU | Freetown | SL3.2.1 | MH608045 |
| NICD4670_SLE_WUR_2014-12-12      | 12 | 12 | 2014 | WAU | Freetown | SL3.2.1 | MH608046 |
| NICD4672_SLE_WUR_2014-12-12      | 12 | 12 | 2014 | WAU | Freetown | SL3.2.1 | MH608047 |
| NICD4674_SLE_WR_2014-12-12       | 12 | 12 | 2014 | WAR | Waterloo | SL3.2.4 | MH608048 |
| NICD4682_SLE_WUR_2014-12-13      | 13 | 12 | 2014 | WAU | Freetown | SL3.1.2 | MH608049 |
| NICD4691_SLE_WUR_2014-12-11      | 11 | 12 | 2014 | WAU | Freetown | SL3.2.1 | MH608050 |
| NICD4692_SLE_WUR_2014-12-13      | 13 | 12 | 2014 | WAU | Freetown | SL3.2.1 | MH608051 |
| NICD4693_SLE_WUR_2014-12-10      | 10 | 12 | 2014 | WAU | Freetown | SL3.2.4 | MH608052 |
| NICD4735_SLE_WUR_2014-12-13      | 13 | 12 | 2014 | WAU | Freetown | SL3.2.4 | MH608053 |
| NICD4743_SLE_WR_2014-12-12       | 12 | 12 | 2014 | WAR | Tombo    | SL2     | MH608054 |
| NICD4795-swab_SLE_WUR_2014-12-14 | 14 | 12 | 2014 | WAU | Freetown | SL3.2.2 | MH608055 |
| NICD4823_SLE_WUR_2014-12-15      | 15 | 12 | 2014 | WAU | Freetown | SL3.2.4 | MH608056 |
| NICD4830_SLE_WUR_2014-12-15      | 15 | 12 | 2014 | WAU | Freetown | SL3.1.2 | MH608057 |
| NICD4877_SLE_WUR_2014-12-16      | 16 | 12 | 2014 | WAU | Freetown | SL3.2.4 | MH608058 |

|                                      |    |    |      |     |          |         |              |
|--------------------------------------|----|----|------|-----|----------|---------|--------------|
| NICD4932-<br>Vero_SLE_WUR_2014-12-17 | 17 | 12 | 2014 | WAU | Freetown | SL3.2.4 | MH60805<br>9 |
| NICD4975_SLE_WUR_2014-12-18          | 18 | 12 | 2014 | WAU | Freetown | SL3.2.4 | MH60806<br>0 |
| NICD5071_SLE_WUR_2014-12-20          | 20 | 12 | 2014 | WAU | Freetown | SL3.2.4 | MH60806<br>1 |
| NICD5154_SLE_WUR_2014-12-23          | 23 | 12 | 2014 | WAU | Freetown | SL2     | MH60806<br>2 |
| NICD5200_SLE_WUR_2014-12-24          | 24 | 12 | 2014 | WAU | Freetown | SL3.1.2 | MH60806<br>3 |
| NICD5260_SLE_WUR_2014-12-24          | 24 | 12 | 2014 | WAU | Freetown | SL3.1.2 | MH60806<br>4 |
| NICD5266_SLE_WUR_2014-12-24          | 24 | 12 | 2014 | WAU | Freetown | SL3.1.2 | MH60806<br>5 |
| NICD5279-<br>swab_SLE_WUR_2014-12-24 | 24 | 12 | 2014 | WAU | Freetown | SL3.2   | MH60806<br>6 |
| NICD5291_SLE_WUR_2014-12-25          | 25 | 12 | 2014 | WAU | Freetown | SL3.2.5 | MH60806<br>7 |
| NICD5293_SLE_WUR_2014-12-25          | 25 | 12 | 2014 | WAU | Freetown | SL3.2.5 | MH60806<br>8 |
| NICD5311_SLE_WUR_2014-12-26          | 26 | 12 | 2014 | WAU | Freetown | SL3.2.5 | MH60806<br>9 |
| NICD5314_SLE_WUR_2014-12-26          | 26 | 12 | 2014 | WAU | Freetown | SL3.1.2 | MH60807<br>0 |
| NICD5354_SLE_WUR_2014-12-27          | 27 | 12 | 2014 | WAU | Freetown | SL3.1.2 | MH60807<br>1 |
| NICD5360_SLE_WUR_2014-12-27          | 27 | 12 | 2014 | WAU | Freetown | SL3.1.2 | MH60807<br>2 |
| NICD5367-<br>swab_SLE_WUR_2014-12-27 | 27 | 12 | 2014 | WAU | Freetown | SL3.2.2 | MH60807<br>3 |
| NICD5370_SLE_WR_2014-12-28           | 28 | 12 | 2014 | WAR | Goderich | SL3.2.5 | MH60807<br>4 |
| NICD5386_SLE_WUR_2014-12-29          | 29 | 12 | 2014 | WAU | Freetown | SL3.2.4 | MH60807<br>5 |
| NICD5388_SLE_WUR_2014-12-29          | 29 | 12 | 2014 | WAU | Freetown | SL3.2.4 | MH60807<br>6 |
| NICD5395_SLE_WUR_2014-12-29          | 29 | 12 | 2014 | WAU | Freetown | SL3.2.4 | MH60807<br>7 |

|                                  |    |    |      |     |          |         |          |
|----------------------------------|----|----|------|-----|----------|---------|----------|
| NICD5400_SLE_WUR_2014-12-28      | 28 | 12 | 2014 | WAU | Freetown | SL3.2.4 | MH608078 |
| NICD5421_SLE_WUR_2014-12-30      | 30 | 12 | 2014 | WAU | Freetown | SL3.2.5 | MH608079 |
| NICD5584_SLE_WUR_2015-01-01      | 1  | 1  | 2015 | WAU | Freetown | SL3.1.1 | MH608080 |
| NICD5647-Vero_SLE_WUR_2015-01-03 | 3  | 1  | 2015 | WAU | Freetown | SL3.2.4 | MH608081 |
| NICD5725_SLE_WUR_2015-01-07      | 7  | 1  | 2015 | WAU | Freetown | SL3.1.2 | MH608082 |
| NICD5747_SLE_WUR_2015-01-08      | 8  | 1  | 2015 | WAU | Freetown | SL3.2.4 | MH608083 |
| NICD5819_SLE_WUR_2015-01-09      | 9  | 1  | 2015 | WAU | Freetown | SL3.2.4 | MH608084 |
| NICD6079_SLE_WUR_2015-01-17      | 17 | 1  | 2015 | WAU | Freetown | SL3.2.2 | MH608085 |
| NICD6123_SLE_WR_2015-01-20       | 20 | 1  | 2015 | WAR | Freetown | SL3.1.2 | MH608086 |
| NICD6141_SLE_WR_2015-01-21       | 21 | 1  | 2015 | WAR | Freetown | SL3.1.2 | MH608087 |
| NICD6195_SLE_WUR_2015-01-23      | 23 | 1  | 2015 | WAU | Freetown | SL3.2.4 | MH608088 |
| NICD6218_SLE_WUR_2015-01-24      | 24 | 1  | 2015 | WAU | Freetown | SL3.1.2 | MH608089 |
| NICD6274_SLE_WUR_2015-01-26      | 26 | 1  | 2015 | WAU | Freetown | SL3.1.2 | MH608090 |
| NICD6345_SLE_WUR_2015-01-27      | 27 | 1  | 2015 | WAU | Freetown | SL3.2.4 | MH608091 |
| NICD6348_SLE_WUR_2015-01-28      | 28 | 1  | 2015 | WAU | Freetown | SL3.2.4 | MH608092 |
| NICD6365_SLE_WR_2015-01-29       | 29 | 1  | 2015 | WAR | Hamilton | SL3.1.2 | MH608093 |
| NICD6392-Vero_SLE_WUR_2015-01-30 | 30 | 1  | 2015 | WAU | Freetown | SL3.2.4 | MH608094 |
| NICD6403_SLE_WUR_2015-01-29      | 29 | 1  | 2015 | WAU | Freetown | SL3.2.4 | MH608095 |
| NICD6404_SLE_WUR_2015-01-29      | 29 | 1  | 2015 | WAU | Freetown | SL3.2.4 | MH608096 |

|                                  |    |   |      |     |          |         |          |
|----------------------------------|----|---|------|-----|----------|---------|----------|
| NICD6414_SLE_WUR_2014-01-30      | 30 | 1 | 2015 | WAU | Freetown | SL3.2.4 | MH608097 |
| NICD6564_SLE_WUR_2015-02-07      | 7  | 2 | 2015 | WAU | Aberdeen | SL3.2.4 | MH608098 |
| NICD6587_SLE_WUR_2015-02-10      | 10 | 2 | 2015 | WAU | Freetown | SL3.2.4 | MH608099 |
| NICD6601_SLE_WUR_2015-02-11      | 11 | 2 | 2015 | WAU | Freetown | SL3.2.4 | MH608100 |
| NICD6605_SLE_WUR_2015-02-11      | 11 | 2 | 2015 | WAU | Aberdeen | SL3.2.4 | MH608101 |
| NICD6640_SLE_WUR_2015-02-13      | 13 | 2 | 2015 | WAU | Freetown | SL3.2.4 | MH608102 |
| NICD6643_SLE_WUR_2015-02-13      | 13 | 2 | 2015 | WAU | Freetown | SL3.2.4 | MH608103 |
| NICD6644_SLE_WUR_2015-02-13      | 13 | 2 | 2015 | WAU | Freetown | SL3.2.4 | MH608104 |
| NICD6672_SLE_WUR_2015-02-14      | 14 | 2 | 2015 | WAU | Freetown | SL3.2.4 | MH608105 |
| NICD6823-swab_SLE_WUR_2015-02-26 | 26 | 2 | 2015 | WAU | Freetown | SL3.2.5 | MH608106 |
| NICD7034_SLE_WUR_2015-03-06      | 6  | 3 | 2015 | WAU | Aberdeen | SL3.2.4 | MH608107 |
| NICD7036_SLE_WUR_2015-03-07      | 7  | 3 | 2015 | WAU | Aberdeen | SL3.2.4 | MH608108 |

**Table S2. Metadata for complete dataset used in this study**

| <b>taxon</b>                                     | <b>Date</b> | <b>Source</b> | <b>DISTRICT</b> | <b>lineage</b> |
|--------------------------------------------------|-------------|---------------|-----------------|----------------|
| EBOV_KT5317_KU296352_SLE_WesternRural_2015-02-24 | 15/02/24    | Genbank       | WAR             | GIN            |
| EBOV_PL4432_KU296481_SLE_Kambia_2015-03-07       | 15/03/07    | Genbank       | Kambia          | GIN            |
| EBOV_PL5249_KU296744_SLE_Kambia_2015-03-24       | 15/03/24    | Genbank       | Kambia          | GIN            |
| EBOV_PL5294_KU296764_SLE_Kambia_2015-03-24       | 15/03/24    | Genbank       | Kambia          | GIN            |
| EBOV_EM095_KM034550_SLE_Kailahun_2014-05-25      | 14/05/25    | Genbank       | Kailahun        | SL1            |
| EBOV_G3676_KM034554_SLE_Kailahun_2014-05-27      | 14/05/27    | Genbank       | Kailahun        | SL1            |
| EBOV_G3680_KM034559_SLE_Kailahun_2014-05-28      | 14/05/28    | Genbank       | Kailahun        | SL1            |
| EBOV_G3683_KM034561_SLE_Kailahun_2014-05-28      | 14/05/28    | Genbank       | Kailahun        | SL1            |
| EBOV_G3687_KM034563_SLE_Kailahun_2014-05-28      | 14/05/28    | Genbank       | Kailahun        | SL1            |
| EBOV_EM_079983_KR817227_SLE_Kailahun_2014-06-13  | 14/06/13    | Genbank       | Kailahun        | SL1            |
| EBOV_EM_080011_KR817229_SLE_Kailahun_2014-06-15  | 14/06/15    | Genbank       | Kailahun        | SL1            |
| EBOV_EM_080132_KR817236_SLE_Kailahun_2014-06-24  | 14/06/24    | Genbank       | Kailahun        | SL1            |
| EBOV_G3686_KM034562_SLE_Kailahun_2014-05-28      | 14/05/28    | Genbank       | Kailahun        | SL2            |
| EBOV_EM106_KM233036_SLE_Kailahun_2014-06-02      | 14/06/02    | Genbank       | Kailahun        | SL2            |
| EBOV_EM115_KM233041_SLE_Kailahun_2014-06-03      | 14/06/03    | Genbank       | Kailahun        | SL2            |
| EBOV_G3713_KM233050_SLE_Kailahun_2014-06-09      | 14/06/09    | Genbank       | Kailahun        | SL2            |
| EBOV_G3750_KM233058_SLE_Kailahun_2014-06-10      | 14/06/10    | Genbank       | Kailahun        | SL2            |
| EBOV_G3765_KM233064_SLE_Kailahun_2014-06-14      | 14/06/14    | Genbank       | Kailahun        | SL2            |
| EBOV_G3789_KM233076_SLE_Kailahun_2014-06-14      | 14/06/14    | Genbank       | Kailahun        | SL2            |
| EBOV_G3798_KM233079_SLE_Kailahun_2014-06-15      | 14/06/15    | Genbank       | Kailahun        | SL2            |
| EBOV_G3805_KM233082_SLE_Kailahun_2014-06-15      | 14/06/15    | Genbank       | Kailahun        | SL2            |
| EBOV_G3814_KM233089_SLE_Kailahun_2014-06-15      | 14/06/15    | Genbank       | Kailahun        | SL2            |
| EBOV_G3817_KM233091_SLE_Kailahun_2014-06-15      | 14/06/15    | Genbank       | Kailahun        | SL2            |
| EBOV_G3819_KM233093_SLE_Kailahun_2014-06-15      | 14/06/15    | Genbank       | Kailahun        | SL2            |
| EBOV_G3850_KM233111_SLE_Kailahun_2014-06-18      | 14/06/18    | Genbank       | Kailahun        | SL2            |
| EBOV_G3856_KM233113_SLE_Kenema_2014-06-18        | 14/06/18    | Genbank       | Kenema          | SL2            |
| EBOV_G3952_KR105211_SLE_Kailahun_2014-06-25      | 14/06/25    | Genbank       | Kailahun        | SL2            |
| EBOV_G4151_KR105215_SLE_Kenema_2014-07-06        | 14/07/06    | Genbank       | Kenema          | SL2            |
| EBOV_G4235_KR105220_SLE_Kailahun_2014-07-11      | 14/07/11    | Genbank       | Kailahun        | SL2            |
| EBOV_G4312_KR105230_SLE_PortLoko_2014-07-12      | 14/07/12    | Genbank       | Port Loko       | SL2            |
| EBOV_G4333_KR105236_SLE_Kailahun_2014-07-13      | 14/07/13    | Genbank       | Kailahun        | SL2            |

|                                                 |          |         |           |     |
|-------------------------------------------------|----------|---------|-----------|-----|
| EBOV_G4316_KR105231_SLE_Kenema_2014-07-13       | 14/07/13 | Genbank | Kenema    | SL2 |
| EBOV_G4337_KR105238_SLE_Kailahun_2014-07-14     | 14/07/14 | Genbank | Kailahun  | SL2 |
| EBOV_G4324_KR105233_SLE_Kenema_2014-07-14       | 14/07/14 | Genbank | Kenema    | SL2 |
| EBOV_G4325_KR105234_SLE_Kenema_2014-07-14       | 14/07/14 | Genbank | Kenema    | SL2 |
| EBOV_G4350_KR105242_SLE_Kenema_2014-07-14       | 14/07/14 | Genbank | Kenema    | SL2 |
| EBOV_G4380_KR105243_SLE_Kenema_2014-07-15       | 14/07/15 | Genbank | Kenema    | SL2 |
| EBOV_G4389_KR105245_SLE_Kenema_2014-07-16       | 14/07/16 | Genbank | Kenema    | SL2 |
| EBOV_G4345_KR105239_SLE_Kenema_2014-07-18       | 14/07/18 | Genbank | Kenema    | SL2 |
| EBOV_G4415_KR105247_SLE_Kenema_2014-07-18       | 14/07/18 | Genbank | Kenema    | SL2 |
| EBOV_G4406_KR105246_SLE_Kono_2014-07-18         | 14/07/18 | Genbank | Kono      | SL2 |
| EBOV_G4422_KR105250_SLE_Kenema_2014-07-19       | 14/07/19 | Genbank | Kenema    | SL2 |
| EBOV_G4450_KR105257_SLE_Kenema_2014-07-21       | 14/07/21 | Genbank | Kenema    | SL2 |
| EBOV_G4527_KR105261_SLE_Kenema_2014-07-26       | 14/07/26 | Genbank | Kenema    | SL2 |
| EBOV_G4701_KR105264_SLE_Kenema_2014-08-03       | 14/08/03 | Genbank | Kenema    | SL2 |
| EBOV_G4702_KR105265_SLE_Kenema_2014-08-03       | 14/08/03 | Genbank | Kenema    | SL2 |
| EBOV_G4837_KR105272_SLE_Kenema_2014-08-09       | 14/08/09 | Genbank | Kenema    | SL2 |
| EBOV_G4856_KR105273_SLE_Kenema_2014-08-10       | 14/08/10 | Genbank | Kenema    | SL2 |
| EBOV_G4886_KR105276_SLE_Kenema_2014-08-11       | 14/08/11 | Genbank | Kenema    | SL2 |
| EBOV_G4907_KR105277_SLE_Kenema_2014-08-12       | 14/08/12 | Genbank | Kenema    | SL2 |
| EBOV_G4942_KR105279_SLE_Moyamba_2014-08-12      | 14/08/12 | Genbank | Moyamba   | SL2 |
| EBOV_G4937_KR105278_SLE_Kenema_2014-08-13       | 14/08/13 | Genbank | Kenema    | SL2 |
| EBOV_G4946_KR105280_SLE_Kenema_2014-08-13       | 14/08/13 | Genbank | Kenema    | SL2 |
| EBOV_G4960_KR105283_SLE_Kenema_2014-08-14       | 14/08/14 | Genbank | Kenema    | SL2 |
| EBOV_G4971_KR105284_SLE_Kenema_2014-08-14       | 14/08/14 | Genbank | Kenema    | SL2 |
| EBOV_G5059_KR105296_SLE_Kenema_2014-08-18       | 14/08/18 | Genbank | Kenema    | SL2 |
| EBOV_20140008_KR653251_SLE_Kenema_2014-08-22    | 14/08/22 | Genbank | Kenema    | SL2 |
| EBOV_20140038_KR653267_SLE_Tonkolili_2014-08-23 | 14/08/23 | Genbank | Tonkolili | SL2 |
| EBOV_Makona-UK1_KP184503_SLE_Kenema_2014-08-25  | 14/08/25 | Genbank | Kenema    | SL2 |
| EBOV_G5370_KR105306_SLE_Kenema_2014-08-28       | 14/08/28 | Genbank | Kenema    | SL2 |
| EBOV_G5364_KR105305_SLE_UNKNOWN_2014-08-28      | 14/08/28 | Genbank | UNKNOWN   | SL2 |
| EBOV_G5570_KR105310_SLE_Kenema_2014-09-08       | 14/09/08 | Genbank | Kenema    | SL2 |
| EBOV_20140910_KR653269_SLE_Kenema_2014-09-18    | 14/09/18 | Genbank | Kenema    | SL2 |
| EBOV_J0156_KP759698_SLE_WesternUrban_2014-11-07 | 14/11/07 | Genbank | WAU       | SL2 |
| NICD4743_SLE_WR_2014-12-12                      | 14/12/12 | NICD    | WAR       | SL2 |

|                                                 |          |         |          |       |
|-------------------------------------------------|----------|---------|----------|-------|
| NICD5154_SLE_WUR_2014-12-23                     | 14/12/23 | NICD    | WAU      | SL2   |
| EBOV_EM096_KM034551_SLE_Kailahun_2014-05-26     | 14/05/26 | Genbank | Kailahun | SL3.1 |
| EBOV_EM098_KM034552_SLE_Kailahun_2014-05-26     | 14/05/26 | Genbank | Kailahun | SL3.1 |
| EBOV_G3677_KM034556_SLE_Kailahun_2014-05-26     | 14/05/26 | Genbank | Kailahun | SL3.1 |
| EBOV_G3670_KM034553_SLE_Kailahun_2014-05-27     | 14/05/27 | Genbank | Kailahun | SL3.1 |
| EBOV_G3679_KM034558_SLE_Kailahun_2014-05-28     | 14/05/28 | Genbank | Kailahun | SL3.1 |
| EBOV_G3682_KM034560_SLE_Kailahun_2014-05-28     | 14/05/28 | Genbank | Kailahun | SL3.1 |
| EBOV_G3707_KM233049_SLE_Kailahun_2014-05-31     | 14/05/31 | Genbank | Kailahun | SL3.1 |
| EBOV_EM104_KM233035_SLE_Kailahun_2014-06-02     | 14/06/02 | Genbank | Kailahun | SL3.1 |
| EBOV_EM110_KM233037_SLE_Kailahun_2014-06-03     | 14/06/03 | Genbank | Kailahun | SL3.1 |
| EBOV_EM111_KM233038_SLE_Kailahun_2014-06-03     | 14/06/03 | Genbank | Kailahun | SL3.1 |
| EBOV_EM112_KM233039_SLE_Kailahun_2014-06-03     | 14/06/03 | Genbank | Kailahun | SL3.1 |
| EBOV_EM113_KM233040_SLE_Kailahun_2014-06-03     | 14/06/03 | Genbank | Kailahun | SL3.1 |
| EBOV_EM120_KM233043_SLE_Kailahun_2014-06-03     | 14/06/03 | Genbank | Kailahun | SL3.1 |
| EBOV_EM121_KM233044_SLE_Kailahun_2014-06-04     | 14/06/04 | Genbank | Kailahun | SL3.1 |
| EBOV_EM124_KM233045_SLE_Kailahun_2014-06-04     | 14/06/04 | Genbank | Kailahun | SL3.1 |
| EBOV_NM042_KM233116_SLE_Kambia_2014-06-04       | 14/06/04 | Genbank | Kambia   | SL3.1 |
| EBOV_G3724_KM233053_SLE_Kailahun_2014-06-05     | 14/06/05 | Genbank | Kailahun | SL3.1 |
| EBOV_G3729_KM233054_SLE_Kailahun_2014-06-07     | 14/06/07 | Genbank | Kailahun | SL3.1 |
| EBOV_G3734_KM233055_SLE_Kailahun_2014-06-07     | 14/06/07 | Genbank | Kailahun | SL3.1 |
| EBOV_G3735_KM233056_SLE_Kailahun_2014-06-07     | 14/06/07 | Genbank | Kailahun | SL3.1 |
| EBOV_G3758_KM233062_SLE_Kailahun_2014-06-11     | 14/06/11 | Genbank | Kailahun | SL3.1 |
| EBOV_G3769_KM233065_SLE_Kailahun_2014-06-12     | 14/06/12 | Genbank | Kailahun | SL3.1 |
| EBOV_G3771_KM233071_SLE_Kailahun_2014-06-12     | 14/06/12 | Genbank | Kailahun | SL3.1 |
| EBOV_G3764_KM233063_SLE_UNKNOWN_2014-06-12      | 14/06/12 | Genbank | UNKNOWN  | SL3.1 |
| EBOV_EM_080003_KR817228_SLE_Kailahun_2014-06-14 | 14/06/14 | Genbank | Kailahun | SL3.1 |
| EBOV_G3782_KM233072_SLE_Kailahun_2014-06-14     | 14/06/14 | Genbank | Kailahun | SL3.1 |
| EBOV_G3786_KM233073_SLE_Kailahun_2014-06-14     | 14/06/14 | Genbank | Kailahun | SL3.1 |
| EBOV_G3787_KM233074_SLE_Kailahun_2014-06-14     | 14/06/14 | Genbank | Kailahun | SL3.1 |
| EBOV_G3788_KM233075_SLE_Kailahun_2014-06-14     | 14/06/14 | Genbank | Kailahun | SL3.1 |
| EBOV_G3795_KM233077_SLE_Kailahun_2014-06-15     | 14/06/15 | Genbank | Kailahun | SL3.1 |
| EBOV_G3796_KM233078_SLE_Kailahun_2014-06-15     | 14/06/15 | Genbank | Kailahun | SL3.1 |
| EBOV_G3799_KM233080_SLE_Kailahun_2014-06-15     | 14/06/15 | Genbank | Kailahun | SL3.1 |
| EBOV_G3800_KM233081_SLE_Kailahun_2014-06-15     | 14/06/15 | Genbank | Kailahun | SL3.1 |

|                                                 |          |         |          |       |
|-------------------------------------------------|----------|---------|----------|-------|
| EBOV_G3807_KM233084_SLE_Kailahun_2014-06-15     | 14/06/15 | Genbank | Kailahun | SL3.1 |
| EBOV_G3808_KM233085_SLE_Kailahun_2014-06-15     | 14/06/15 | Genbank | Kailahun | SL3.1 |
| EBOV_G3809_KM233086_SLE_Kailahun_2014-06-15     | 14/06/15 | Genbank | Kailahun | SL3.1 |
| EBOV_G3810_KM233087_SLE_Kailahun_2014-06-15     | 14/06/15 | Genbank | Kailahun | SL3.1 |
| EBOV_G3816_KM233090_SLE_Kailahun_2014-06-15     | 14/06/15 | Genbank | Kailahun | SL3.1 |
| EBOV_G3818_KM233092_SLE_Kailahun_2014-06-15     | 14/06/15 | Genbank | Kailahun | SL3.1 |
| EBOV_G3820_KM233094_SLE_Kailahun_2014-06-15     | 14/06/15 | Genbank | Kailahun | SL3.1 |
| EBOV_G3821_KM233095_SLE_Kailahun_2014-06-15     | 14/06/15 | Genbank | Kailahun | SL3.1 |
| EBOV_G3822_KM233096_SLE_Kailahun_2014-06-15     | 14/06/15 | Genbank | Kailahun | SL3.1 |
| EBOV_G3823_KM233097_SLE_Kailahun_2014-06-15     | 14/06/15 | Genbank | Kailahun | SL3.1 |
| EBOV_G3826_KM233100_SLE_Kailahun_2014-06-16     | 14/06/16 | Genbank | Kailahun | SL3.1 |
| EBOV_G3827_KM233101_SLE_Kailahun_2014-06-16     | 14/06/16 | Genbank | Kailahun | SL3.1 |
| EBOV_G3831_KM233103_SLE_Kailahun_2014-06-16     | 14/06/16 | Genbank | Kailahun | SL3.1 |
| EBOV_G3838_KR105200_SLE_Kailahun_2014-06-16     | 14/06/16 | Genbank | Kailahun | SL3.1 |
| EBOV_G3841_KM233107_SLE_Bo_2014-06-17           | 14/06/17 | Genbank | Bo       | SL3.1 |
| EBOV_G3838_KM233105_SLE_Kailahun_2014-06-17     | 14/06/17 | Genbank | Kailahun | SL3.1 |
| EBOV_G3840_KM233106_SLE_Kailahun_2014-06-17     | 14/06/17 | Genbank | Kailahun | SL3.1 |
| EBOV_G3845_KM233108_SLE_Kailahun_2014-06-18     | 14/06/18 | Genbank | Kailahun | SL3.1 |
| EBOV_G3845_KR105201_SLE_Kenema_2014-06-19       | 14/06/19 | Genbank | Kenema   | SL3.1 |
| EBOV_G3917_KR105207_SLE_Kenema_2014-06-21       | 14/06/21 | Genbank | Kenema   | SL3.1 |
| EBOV_G3926_KR105208_SLE_Kailahun_2014-06-22     | 14/06/22 | Genbank | Kailahun | SL3.1 |
| EBOV_G3949_KR105209_SLE_UNKNOWN_2014-06-24      | 14/06/24 | Genbank | UNKNOWN  | SL3.1 |
| EBOV_G3950_KR105210_SLE_UNKNOWN_2014-06-24      | 14/06/24 | Genbank | UNKNOWN  | SL3.1 |
| EBOV_G3972_KR105212_SLE_UNKNOWN_2014-06-24      | 14/06/24 | Genbank | UNKNOWN  | SL3.1 |
| EBOV_EM_080165_KR817238_SLE_Kailahun_2014-06-26 | 14/06/26 | Genbank | Kailahun | SL3.1 |
| EBOV_G4133_KR105214_SLE_Kailahun_2014-07-04     | 14/07/04 | Genbank | Kailahun | SL3.1 |
| EBOV_G4217_KR105218_SLE_Bo_2014-07-08           | 14/07/08 | Genbank | Bo       | SL3.1 |
| EBOV_G4348_KR105241_SLE_Kenema_2014-07-09       | 14/07/09 | Genbank | Kenema   | SL3.1 |
| EBOV_G4221_KR105219_SLE_UNKNOWN_2014-07-09      | 14/07/09 | Genbank | UNKNOWN  | SL3.1 |
| EBOV_G4236_KR105221_SLE_Kailahun_2014-07-10     | 14/07/10 | Genbank | Kailahun | SL3.1 |
| EBOV_G4250_KR105222_SLE_Kailahun_2014-07-11     | 14/07/11 | Genbank | Kailahun | SL3.1 |
| EBOV_G4251_KR105223_SLE_Kailahun_2014-07-11     | 14/07/11 | Genbank | Kailahun | SL3.1 |
| EBOV_G4252_KR105224_SLE_Kailahun_2014-07-11     | 14/07/11 | Genbank | Kailahun | SL3.1 |
| EBOV_G4254_KR105225_SLE_Kailahun_2014-07-11     | 14/07/11 | Genbank | Kailahun | SL3.1 |



|                                                |          |         |              |       |
|------------------------------------------------|----------|---------|--------------|-------|
| EBOV_G4299_KR105229_SLE_Kailahun_2014-07-12    | 14/07/12 | Genbank | Kailahun     | SL3.1 |
| EBOV_G4382_KR105244_SLE_Kenema_2014-07-16      | 14/07/16 | Genbank | Kenema       | SL3.1 |
| EBOV_G4416_KR105248_SLE_Bo_2014-07-18          | 14/07/18 | Genbank | Bo           | SL3.1 |
| EBOV_G4419_KR105249_SLE_Kenema_2014-07-19      | 14/07/19 | Genbank | Kenema       | SL3.1 |
| EBOV_G4433_KR105254_SLE_Kailahun_2014-07-20    | 14/07/20 | Genbank | Kailahun     | SL3.1 |
| EBOV_G4437_KR105255_SLE_Kenema_2014-07-20      | 14/07/20 | Genbank | Kenema       | SL3.1 |
| EBOV_G4445_KR105256_SLE_Kenema_2014-07-21      | 14/07/21 | Genbank | Kenema       | SL3.1 |
| EBOV_G4751_KR105271_SLE_UNKNOWN_2014-08-05     | 14/08/05 | Genbank | UNKNOWN      | SL3.1 |
| EBOV_G4973_KR105286_SLE_UNKNOWN_2014-08-12     | 14/08/12 | Genbank | UNKNOWN      | SL3.1 |
| EBOV_G5012_KR105292_SLE_WesternArea_2014-08-15 | 14/08/15 | Genbank | Western Area | SL3.1 |
| EBOV_G5016_KR105293_SLE_Kenema_2014-08-16      | 14/08/16 | Genbank | Kenema       | SL3.1 |
| EBOV_20140100_KR653241_SLE_Pujehun_2014-08-24  | 14/08/24 | Genbank | Pujehun      | SL3.1 |
| EBOV_20140161_KR653265_SLE_Kailahun_2014-08-27 | 14/08/27 | Genbank | Kailahun     | SL3.1 |
| EBOV_20140254_KR653296_SLE_Bo_2014-08-29       | 14/08/29 | Genbank | Bo           | SL3.1 |
| EBOV_20140517_KR653263_SLE_Kailahun_2014-09-05 | 14/09/05 | Genbank | Kailahun     | SL3.1 |
| EBOV_G5571_KR105311_SLE_Kenema_2014-09-08      | 14/09/08 | Genbank | Kenema       | SL3.1 |
| EBOV_20140729_KR653286_SLE_Bo_2014-09-10       | 14/09/10 | Genbank | Bo           | SL3.1 |
| EBOV_G5640_KR105313_SLE_UNKNOWN_2014-09-11     | 14/09/11 | Genbank | UNKNOWN      | SL3.1 |
| EBOV_G5644_KR105314_SLE_UNKNOWN_2014-09-11     | 14/09/11 | Genbank | UNKNOWN      | SL3.1 |
| EBOV_G5647_KR105315_SLE_UNKNOWN_2014-09-11     | 14/09/11 | Genbank | UNKNOWN      | SL3.1 |
| EBOV_20140933_KR653280_SLE_Moyamba_2014-09-16  | 14/09/16 | Genbank | Moyamba      | SL3.1 |
| EBOV_G5731_KR105320_SLE_Moyamba_2014-09-16     | 14/09/16 | Genbank | Moyamba      | SL3.1 |
| EBOV_G5737_KR105321_SLE_Moyamba_2014-09-16     | 14/09/16 | Genbank | Moyamba      | SL3.1 |
| EBOV_G5763_KR105325_SLE_Moyamba_2014-09-16     | 14/09/16 | Genbank | Moyamba      | SL3.1 |
| EBOV_G5765_KR105326_SLE_Moyamba_2014-09-16     | 14/09/16 | Genbank | Moyamba      | SL3.1 |
| EBOV_G5767_KR105327_SLE_UNKNOWN_2014-09-16     | 14/09/16 | Genbank | UNKNOWN      | SL3.1 |
| EBOV_G5756_KR105324_SLE_UNKNOWN_2014-09-18     | 14/09/18 | Genbank | UNKNOWN      | SL3.1 |
| EBOV_20141043_KR653305_SLE_Moyamba_2014-09-21  | 14/09/21 | Genbank | Moyamba      | SL3.1 |
| EBOV_20141061_KR653250_SLE_Moyamba_2014-09-21  | 14/09/21 | Genbank | Moyamba      | SL3.1 |
| EBOV_G5844_KR105328_SLE_Moyamba_2014-09-21     | 14/09/21 | Genbank | Moyamba      | SL3.1 |
| EBOV_20141012_KR653244_SLE_Pujehun_2014-09-21  | 14/09/21 | Genbank | Pujehun      | SL3.1 |
| EBOV_G5879_KR105330_SLE_Pujehun_2014-09-22     | 14/09/22 | Genbank | Pujehun      | SL3.1 |
| EBOV_20141241_KR653300_SLE_PortLoko_2014-09-24 | 14/09/24 | Genbank | Port Loko    | SL3.1 |

|                                                      |          |         |           |         |
|------------------------------------------------------|----------|---------|-----------|---------|
| EBOV_G6060_KR105342_SLE_Pujehun_2014-09-25           | 14/09/25 | Genbank | Pujehun   | SL3.1   |
| EBOV_G6062_KR105343_SLE_Pujehun_2014-09-25           | 14/09/25 | Genbank | Pujehun   | SL3.1   |
| EBOV_20141227_KR653303_SLE_Bo_2014-09-26             | 14/09/26 | Genbank | Bo        | SL3.1   |
| EBOV_20141643_KR653233_SLE_Pujehun_2014-10-04        | 14/10/04 | Genbank | Pujehun   | SL3.1   |
| EBOV_20142065_KR653274_SLE_Kenema_2014-10-11         | 14/10/11 | Genbank | Kenema    | SL3.1   |
| EBOV_20142477_KR653255_SLE_Moyamba_2014-10-19        | 14/10/19 | Genbank | Moyamba   | SL3.1   |
| EBOV_20143164_KR653277_SLE_Kenema_2014-10-27         | 14/10/27 | Genbank | Kenema    | SL3.1   |
| EBOV_20143466_KR653304_SLE_Kenema_2014-11-01         | 14/11/01 | Genbank | Kenema    | SL3.1   |
| EBOV_EM119_KM233042_SLE_Kailahun_2014-06-03          | 14/06/03 | Genbank | Kailahun  | SL3.1.1 |
| EBOV_G3770_KM233069_SLE_Kailahun_2014-06-12          | 14/06/12 | Genbank | Kailahun  | SL3.1.1 |
| EBOV_G3846_KM233109_SLE_Kailahun_2014-06-18          | 14/06/18 | Genbank | Kailahun  | SL3.1.1 |
| EBOV_G4190_KR105216_SLE_Kailahun_2014-07-07          | 14/07/07 | Genbank | Kailahun  | SL3.1.1 |
| NICD0143_SLE_WUR_2014-08-31                          | 14/08/31 | NICD    | WAU       | SL3.1.1 |
| EBOV_G6012_KR105340_SLE_UNKNOWN_2014-09-25           | 14/09/25 | Genbank | UNKNOWN   | SL3.1.1 |
| NICD1275_SLE_WR_2014-09-25                           | 14/09/25 | NICD    | WAR       | SL3.1.1 |
| EBOV_J0053_KP759721_SLE_WesternRural_2014-10-06      | 14/10/06 | Genbank | WAR       | SL3.1.1 |
| EBOV_J0054_KP759722_SLE_WesternRural_2014-10-06      | 14/10/06 | Genbank | WAR       | SL3.1.1 |
| EBOV_J0051_KP759633_SLE_WesternUrban_2014-10-07      | 14/10/07 | Genbank | WAU       | SL3.1.1 |
| EBOV_20142407_KR653249_SLE_Tonkolili_2014-10-16      | 14/10/16 | Genbank | Tonkolili | SL3.1.1 |
| EBOV_20142417_KR653254_SLE_Bo_2014-10-19             | 14/10/19 | Genbank | Bo        | SL3.1.1 |
| EBOV_J0092_KP759650_SLE_WesternRural_2014-10-25      | 14/10/25 | Genbank | WAR       | SL3.1.1 |
| EBOV_J0099_KP759764_SLE_Kambia_2014-10-28            | 14/10/28 | Genbank | Kambia    | SL3.1.1 |
| EBOV_J0137_KP759685_SLE_WesternRural_2014-11-01      | 14/11/01 | Genbank | WAR       | SL3.1.1 |
| NICD2763-Vero_SLE_PL_2014-11-06                      | 14/11/06 | NICD    | Port Loko | SL3.1.1 |
| EBOV_20143964_KR653242_SLE_Bo_2014-11-07             | 14/11/07 | Genbank | Bo        | SL3.1.1 |
| NICD3577_SLE_WR_2014-11-20                           | 14/11/20 | NICD    | WAR       | SL3.1.1 |
| NICD3926_SLE_WUR_2014-11-27                          | 14/11/27 | NICD    | WAU       | SL3.1.1 |
| NICD5584_SLE_WUR_2015-01-01                          | 15/01/01 | NICD    | WAU       | SL3.1.1 |
| EBOV_77577_EMLK_KU296533_SLE_WesternUrban_2015-01-03 | 15/01/03 | Genbank | WAU       | SL3.1.1 |
| EBOV_77578_EMLK_KU296806_SLE_WesternUrban_2015-01-03 | 15/01/03 | Genbank | WAU       | SL3.1.1 |
| EBOV_77588_EMLK_KU296801_SLE_WesternUrban_2015-01-04 | 15/01/04 | Genbank | WAU       | SL3.1.1 |
| EBOV_DML24708_KT357845_SLE_Kono_2015-01-28           | 15/01/28 | Genbank | Kono      | SL3.1.1 |
| EBOV_KT5022_KU296519_SLE_WesternRural_2015-02-13     | 15/02/13 | Genbank | WAR       | SL3.1.1 |
| EBOV_PL4226_KU296615_SLE_Kambia_2015-03-02           | 15/03/02 | Genbank | Kambia    | SL3.1.1 |

|                                                 |          |         |           |         |
|-------------------------------------------------|----------|---------|-----------|---------|
| EBOV_PL4483_KU296389_SLE_Kambia_2015-03-08      | 15/03/08 | Genbank | Kambia    | SL3.1.1 |
| EBOV_PL4736_KU296724_SLE_Kambia_2015-03-13      | 15/03/13 | Genbank | Kambia    | SL3.1.1 |
| EBOV_PL4763_KU296503_SLE_Kambia_2015-03-14      | 15/03/14 | Genbank | Kambia    | SL3.1.1 |
| EBOV_PL4864_KU296437_SLE_Kambia_2015-03-16      | 15/03/16 | Genbank | Kambia    | SL3.1.1 |
| EBOV_PL4865_KU296633_SLE_Kambia_2015-03-16      | 15/03/16 | Genbank | Kambia    | SL3.1.1 |
| EBOV_PL4866_KU296390_SLE_Kambia_2015-03-16      | 15/03/16 | Genbank | Kambia    | SL3.1.1 |
| EBOV_PL5025_KU296412_SLE_Kambia_2015-03-20      | 15/03/20 | Genbank | Kambia    | SL3.1.1 |
| EBOV_PL5157_KU296421_SLE_PortLoko_2015-03-22    | 15/03/22 | Genbank | Port Loko | SL3.1.1 |
| EBOV_PL6049_KU296743_SLE_Kambia_2015-04-11      | 15/04/11 | Genbank | Kambia    | SL3.1.1 |
| EBOV_14743_EML_KU296298_SLE_Kambia_2015-04-19   | 15/04/19 | Genbank | Kambia    | SL3.1.1 |
| EBOV_14846_EMLK_KU296831_SLE_Kambia_2015-04-29  | 15/04/29 | Genbank | Kambia    | SL3.1.1 |
| EBOV_PL6656_KU296523_SLE_PortLoko_2015-05-01    | 15/05/01 | Genbank | Port Loko | SL3.1.1 |
| EBOV_15000_EMLK_KU296504_SLE_Kambia_2015-05-13  | 15/05/13 | Genbank | Kambia    | SL3.1.1 |
| EBOV_PL7053_KU296757_SLE_PortLoko_2015-05-15    | 15/05/15 | Genbank | Port Loko | SL3.1.1 |
| EBOV_PL7055_KU296484_SLE_PortLoko_2015-05-15    | 15/05/15 | Genbank | Port Loko | SL3.1.1 |
| EBOV_PL7136b_KU296732_SLE_PortLoko_2015-05-18   | 15/05/18 | Genbank | Port Loko | SL3.1.1 |
| EBOV_PL7375_KU296498_SLE_PortLoko_2015-05-27    | 15/05/27 | Genbank | Port Loko | SL3.1.1 |
| EBOV_PL7376_KU296740_SLE_PortLoko_2015-05-27    | 15/05/27 | Genbank | Port Loko | SL3.1.1 |
| EBOV_PL7401_KU296819_SLE_PortLoko_2015-05-27    | 15/05/27 | Genbank | Port Loko | SL3.1.1 |
| EBOV_15207R_EMLK_KU296488_SLE_Kambia_2015-05-29 | 15/05/29 | Genbank | Kambia    | SL3.1.1 |
| EBOV_PL7429_KU296617_SLE_PortLoko_2015-05-29    | 15/05/29 | Genbank | Port Loko | SL3.1.1 |
| EBOV_PL7451_KU296837_SLE_PortLoko_2015-05-29    | 15/05/29 | Genbank | Port Loko | SL3.1.1 |
| EBOV_PL7496_KU296846_SLE_PortLoko_2015-05-31    | 15/05/31 | Genbank | Port Loko | SL3.1.1 |
| EBOV_PL7511_KU296685_SLE_PortLoko_2015-06-01    | 15/06/01 | Genbank | Port Loko | SL3.1.1 |
| EBOV_PL7551_KU296322_SLE_PortLoko_2015-06-02    | 15/06/02 | Genbank | Port Loko | SL3.1.1 |
| EBOV_PL7577_KU296385_SLE_PortLoko_2015-06-03    | 15/06/03 | Genbank | Port Loko | SL3.1.1 |
| EBOV_15274_EMLK_KU296337_SLE_Kambia_2015-06-04  | 15/06/04 | Genbank | Kambia    | SL3.1.1 |
| EBOV_PL7604_KU296592_SLE_PortLoko_2015-06-04    | 15/06/04 | Genbank | Port Loko | SL3.1.1 |
| EBOV_PL7605_KU296486_SLE_PortLoko_2015-06-04    | 15/06/04 | Genbank | Port Loko | SL3.1.1 |
| EBOV_PL7626_KU296753_SLE_PortLoko_2015-06-04    | 15/06/04 | Genbank | Port Loko | SL3.1.1 |
| EBOV_15314_EMLK_KU296600_SLE_Kambia_2015-06-06  | 15/06/06 | Genbank | Kambia    | SL3.1.1 |
| EBOV_PL7678_KU296625_SLE_PortLoko_2015-06-06    | 15/06/06 | Genbank | Port Loko | SL3.1.1 |
| EBOV_PL7685_KU296556_SLE_PortLoko_2015-06-06    | 15/06/06 | Genbank | Port Loko | SL3.1.1 |
| EBOV_PL7689_KU296712_SLE_PortLoko_2015-06-06    | 15/06/06 | Genbank | Port Loko | SL3.1.1 |

|                                                 |          |         |           |         |
|-------------------------------------------------|----------|---------|-----------|---------|
| EBOV_PL7709_KU296426_SLE_PortLoko_2015-06-06    | 15/06/06 | Genbank | Port Loko | SL3.1.1 |
| EBOV_15323_EMLK_KU296668_SLE_Kambia_2015-06-07  | 15/06/07 | Genbank | Kambia    | SL3.1.1 |
| EBOV_15327_EMLK_KU296649_SLE_Kambia_2015-06-07  | 15/06/07 | Genbank | Kambia    | SL3.1.1 |
| EBOV_15338_EMLK_KU296414_SLE_Kambia_2015-06-08  | 15/06/08 | Genbank | Kambia    | SL3.1.1 |
| EBOV_15360_EMLK_KU296399_SLE_Kambia_2015-06-08  | 15/06/08 | Genbank | Kambia    | SL3.1.1 |
| EBOV_PL7773_KU296417_SLE_UNKNOWN_2015-06-08     | 15/06/08 | Genbank | UNKNOWN   | SL3.1.1 |
| EBOV_PL7774_KU296589_SLE_2015-06-08             | 15/06/08 | Genbank | UNKNOWN   | SL3.1.1 |
| EBOV_PL7775_KU296422_SLE_UNKNOWN_2015-06-08     | 15/06/08 | Genbank | UNKNOWN   | SL3.1.1 |
| EBOV_15349_EMLK_KU296442_SLE_Kambia_2015-06-09  | 15/06/09 | Genbank | Kambia    | SL3.1.1 |
| EBOV_PL7792_KU296793_SLE_PortLoko_2015-06-09    | 15/06/09 | Genbank | Port Loko | SL3.1.1 |
| EBOV_PL7801_KU296327_SLE_PortLoko_2015-06-09    | 15/06/09 | Genbank | Port Loko | SL3.1.1 |
| EBOV_PL7820_KU296804_SLE_PortLoko_2015-06-09    | 15/06/09 | Genbank | Port Loko | SL3.1.1 |
| EBOV_15373_EMLK_KU296802_SLE_Kambia_2015-06-10  | 15/06/10 | Genbank | Kambia    | SL3.1.1 |
| EBOV_PL7834_KU296326_SLE_PortLoko_2015-06-10    | 15/06/10 | Genbank | Port Loko | SL3.1.1 |
| EBOV_PL7946_KU296667_SLE_PortLoko_2015-06-12    | 15/06/12 | Genbank | Port Loko | SL3.1.1 |
| EBOV_PL7947_KU296571_SLE_PortLoko_2015-06-12    | 15/06/12 | Genbank | Port Loko | SL3.1.1 |
| EBOV_15421_EMLK_KU296796_SLE_Kambia_2015-06-13  | 15/06/13 | Genbank | Kambia    | SL3.1.1 |
| EBOV_15438R_EMLK_KU296353_SLE_Kambia_2015-06-14 | 15/06/14 | Genbank | Kambia    | SL3.1.1 |
| EBOV_15470_EMLK_KU296543_SLE_Kambia_2015-06-16  | 15/06/16 | Genbank | Kambia    | SL3.1.1 |
| EBOV_PL8128_KU296340_SLE_PortLoko_2015-06-16    | 15/06/16 | Genbank | Port Loko | SL3.1.1 |
| EBOV_PL8172_KU296428_SLE_PortLoko_2015-06-18    | 15/06/18 | Genbank | Port Loko | SL3.1.1 |
| EBOV_PL8310_KU296618_SLE_PortLoko_2015-06-21    | 15/06/21 | Genbank | Port Loko | SL3.1.1 |
| EBOV_15543_EMLK_KU296666_SLE_Kambia_2015-06-22  | 15/06/22 | Genbank | Kambia    | SL3.1.1 |
| EBOV_PL8429_KU296440_SLE_PortLoko_2015-06-24    | 15/06/24 | Genbank | Port Loko | SL3.1.1 |
| EBOV_15661_EMLK_KU296822_SLE_Kambia_2015-06-28  | 15/06/28 | Genbank | Kambia    | SL3.1.1 |
| EBOV_15674_EMLK_KU296843_SLE_Kambia_2015-06-28  | 15/06/28 | Genbank | Kambia    | SL3.1.1 |
| EBOV_PL8630_KU296325_SLE_PortLoko_2015-06-29    | 15/06/29 | Genbank | Port Loko | SL3.1.1 |
| EBOV_15686_EMLK_KU296555_SLE_Kambia_2015-06-30  | 15/06/30 | Genbank | Kambia    | SL3.1.1 |
| EBOV_PL8780_KU296404_SLE_PortLoko_2015-07-03    | 15/07/03 | Genbank | Port Loko | SL3.1.1 |
| EBOV_19521_EMLK_KU296306_SLE_Kambia_2015-07-05  | 15/07/05 | Genbank | Kambia    | SL3.1.1 |
| EBOV_KT7095_KU296690_SLE_Kambia_2015-07-05      | 15/07/05 | Genbank | Kambia    | SL3.1.1 |
| EBOV_PL8896_KU296342_SLE_PortLoko_2015-07-06    | 15/07/06 | Genbank | Port Loko | SL3.1.1 |
| EBOV_19560R_EMLK_KU296580_SLE_Kambia_2015-07-07 | 15/07/07 | Genbank | Kambia    | SL3.1.1 |
| EBOV_PL9150_KU296522_SLE_PortLoko_2015-07-12    | 15/07/12 | Genbank | Port Loko | SL3.1.1 |

|                                                    |          |         |           |         |
|----------------------------------------------------|----------|---------|-----------|---------|
| EBOV_PL9192_KU296401_SLE_PortLoko_2015-07-13       | 15/07/13 | Genbank | Port Loko | SL3.1.1 |
| EBOV_PL9199_KU296371_SLE_PortLoko_2015-07-13       | 15/07/13 | Genbank | Port Loko | SL3.1.1 |
| EBOV_020380_EMLK_KU296775_SLE_Kambia_2015-08-28    | 15/08/28 | Genbank | Kambia    | SL3.1.1 |
| EBOV_020484_EMLK_KU296462_SLE_Kambia_2015-09-04    | 15/09/04 | Genbank | Kambia    | SL3.1.1 |
| EBOV_20524_EMLK_KU296424_SLE_Kambia_2015-09-06     | 15/09/06 | Genbank | Kambia    | SL3.1.1 |
| EBOV_20525_EMLK_KU296487_SLE_Kambia_2015-09-06     | 15/09/06 | Genbank | Kambia    | SL3.1.1 |
| EBOV_20547_EMLK_KU296455_SLE_Kambia_2015-09-07     | 15/09/07 | Genbank | Kambia    | SL3.1.1 |
| EBOV_G5244_KR105301_SLE_UNKNOWN_2014-08-22         | 14/08/22 | Genbank | UNKNOWN   | SL3.1.2 |
| NICD0022_SLE_WUR_2014-08-26                        | 14/08/26 | NICD    | WAU       | SL3.1.2 |
| NICD0031_SLE_WUR_2014-08-26                        | 14/08/26 | NICD    | WAU       | SL3.1.2 |
| NICD0034_SLE_WUR_2014-08-26                        | 14/08/26 | NICD    | WAU       | SL3.1.2 |
| EBOV_20140174_KR653294_SLE_WesternUrban_2014-08-27 | 14/08/27 | Genbank | WAU       | SL3.1.2 |
| NICD0393-Vero_SLE_WUR_2014-09-09                   | 14/09/09 | NICD    | WAU       | SL3.1.2 |
| EBOV_G5723_KR105319_SLE_Bonthe_2014-09-15          | 14/09/15 | Genbank | Bonthe    | SL3.1.2 |
| EBOV_20140872_KR653297_SLE_WesternUrban_2014-09-15 | 14/09/15 | Genbank | WAU       | SL3.1.2 |
| NICD1113_SLE_BOM_2014-09-19                        | 14/09/19 | NICD    | Bombali   | SL3.1.2 |
| NICD0821_SLE_WR_2014-09-20                         | 14/09/20 | NICD    | WAR       | SL3.1.2 |
| NICD0983_SLE_WUR_2014-09-22                        | 14/09/22 | NICD    | WAU       | SL3.1.2 |
| NICD0986-Vero_SLE_WUR_2014-09-22                   | 14/09/22 | NICD    | WAU       | SL3.1.2 |
| NICD1209-Vero_SLE_WUR_2014-09-23                   | 14/09/23 | NICD    | WAU       | SL3.1.2 |
| EBOV_G6069_KR105344_SLE_Kambia_2014-09-25          | 14/09/25 | Genbank | Kambia    | SL3.1.2 |
| EBOV_G6020_KR105341_SLE_UNKNOWN_2014-09-25         | 14/09/25 | Genbank | UNKNOWN   | SL3.1.2 |
| EBOV_20141352_KR653284_SLE_Kambia_2014-09-26       | 14/09/26 | Genbank | Kambia    | SL3.1.2 |
| EBOV_J0005_KP759628_SLE_WesternRural_2014-09-26    | 14/09/26 | Genbank | WAR       | SL3.1.2 |
| EBOV_J0001_KP759636_SLE_WesternRural_2014-09-27    | 14/09/27 | Genbank | WAR       | SL3.1.2 |
| EBOV_J0007_KP759631_SLE_WesternRural_2014-09-27    | 14/09/27 | Genbank | WAR       | SL3.1.2 |
| EBOV_J0002_KP759640_SLE_WesternUrban_2014-09-27    | 14/09/27 | Genbank | WAU       | SL3.1.2 |
| EBOV_20141397_KR653288_SLE_Moyamba_2014-09-28      | 14/09/28 | Genbank | Moyamba   | SL3.1.2 |
| EBOV_G6103_KR105348_SLE_Moyamba_2014-09-28         | 14/09/28 | Genbank | Moyamba   | SL3.1.2 |
| EBOV_G6104_KR105349_SLE_Moyamba_2014-09-28         | 14/09/28 | Genbank | Moyamba   | SL3.1.2 |
| EBOV_J0024_KP759663_SLE_WesternRural_2014-09-29    | 14/09/29 | Genbank | WAR       | SL3.1.2 |
| EBOV_J0008_KP759718_SLE_WesternUrban_2014-09-29    | 14/09/29 | Genbank | WAU       | SL3.1.2 |
| NICD1458_SLE_WUR_2014-09-29                        | 14/09/29 | NICD    | WAU       | SL3.1.2 |
| EBOV_J0016_KP759742_SLE_WesternRural_2014-09-30    | 14/09/30 | Genbank | WAR       | SL3.1.2 |

|                                                 |          |         |              |         |
|-------------------------------------------------|----------|---------|--------------|---------|
| EBOV_J0028_KP759683_SLE_Bombali_2014-10-02      | 14/10/02 | Genbank | Bombali      | SL3.1.2 |
| EBOV_J0039_KP759620_SLE_PortLoko_2014-10-03     | 14/10/03 | Genbank | Port Loko    | SL3.1.2 |
| EBOV_J0041_KP759710_SLE_WesternArea_2014-10-04  | 14/10/04 | Genbank | Western Area | SL3.1.2 |
| EBOV_J0042_KP759711_SLE_WesternRural_2014-10-04 | 14/10/04 | Genbank | WAR          | SL3.1.2 |
| EBOV_J0050_KP759719_SLE_WesternUrban_2014-10-05 | 14/10/05 | Genbank | WAU          | SL3.1.2 |
| EBOV_20141997_KR653293_SLE_Kono_2014-10-10      | 14/10/10 | Genbank | Kono         | SL3.1.2 |
| EBOV_J0066_KP759730_SLE_WesternArea_2014-10-10  | 14/10/10 | Genbank | Western Area | SL3.1.2 |
| NICD2031-Vero_SLE_WUR_2014-10-11                | 14/10/11 | NICD    | WAU          | SL3.1.2 |
| NICD2032-Vero_SLE_WUR_2014-10-11                | 14/10/11 | NICD    | WAU          | SL3.1.2 |
| NICD2538_SLE_WUR_2014-10-22                     | 14/10/22 | NICD    | WAU          | SL3.1.2 |
| NICD2541_SLE_WUR_2014-10-22                     | 14/10/22 | NICD    | WAU          | SL3.1.2 |
| EBOV_J0089_KP759758_SLE_WesternArea_2014-10-23  | 14/10/23 | Genbank | Western Area | SL3.1.2 |
| EBOV_20143317_KR653282_SLE_Bombali_2014-10-29   | 14/10/29 | Genbank | Bombali      | SL3.1.2 |
| EBOV_J0121_KP759669_SLE_WesternUrban_2014-10-29 | 14/10/29 | Genbank | WAU          | SL3.1.2 |
| EBOV_J0113_KP759662_SLE_WesternUrban_2014-10-30 | 14/10/30 | Genbank | WAU          | SL3.1.2 |
| EBOV_J0112_KP759661_SLE_WesternArea_2014-10-31  | 14/10/31 | Genbank | Western Area | SL3.1.2 |
| EBOV_J0134_KP759682_SLE_WesternRural_2014-10-31 | 14/10/31 | Genbank | WAR          | SL3.1.2 |
| EBOV_20143458_KR653245_SLE_Tonkolili_2014-11-01 | 14/11/01 | Genbank | Tonkolili    | SL3.1.2 |
| EBOV_J0135_KP759602_SLE_WesternRural_2014-11-03 | 14/11/03 | Genbank | WAR          | SL3.1.2 |
| EBOV_J0143_KP759604_SLE_Kambia_2014-11-04       | 14/11/04 | Genbank | Kambia       | SL3.1.2 |
| EBOV_J0144_KP759605_SLE_Kambia_2014-11-04       | 14/11/04 | Genbank | Kambia       | SL3.1.2 |
| EBOV_J0159_KP759619_SLE_WesternRural_2014-11-05 | 14/11/05 | Genbank | WAR          | SL3.1.2 |
| NICD2748_SLE_KMB_2014-11-06                     | 14/11/06 | NICD    | Kambia       | SL3.1.2 |
| EBOV_J0150_KP759696_SLE_WesternUrban_2014-11-06 | 14/11/06 | Genbank | WAU          | SL3.1.2 |
| EBOV_J0157_KP759699_SLE_WesternUrban_2014-11-06 | 14/11/06 | Genbank | WAU          | SL3.1.2 |
| EBOV_J0154_KP759617_SLE_WesternArea_2014-11-07  | 14/11/07 | Genbank | Western Area | SL3.1.2 |
| EBOV_J0146_KP759610_SLE_WesternUrban_2014-11-07 | 14/11/07 | Genbank | WAU          | SL3.1.2 |
| EBOV_J0147_KP759611_SLE_WesternUrban_2014-11-07 | 14/11/07 | Genbank | WAU          | SL3.1.2 |
| EBOV_J0149_KP759695_SLE_WesternUrban_2014-11-07 | 14/11/07 | Genbank | WAU          | SL3.1.2 |
| EBOV_J0171_KP759707_SLE_WesternRural_2014-11-10 | 14/11/10 | Genbank | WAR          | SL3.1.2 |

|                                                  |          |         |              |         |
|--------------------------------------------------|----------|---------|--------------|---------|
| NICD3031_SLE_PL_2014-11-11                       | 14/11/11 | NICD    | Port Loko    | SL3.1.2 |
| EBOV_J0174_KP759708_SLE_WesternArea_2014-11-11   | 14/11/11 | Genbank | Western Area | SL3.1.2 |
| EBOV_J0173_KP759627_SLE_WesternRural_2014-11-11  | 14/11/11 | Genbank | WAR          | SL3.1.2 |
| EBOV_20144521_KR653271_SLE_Kono_2014-11-12       | 14/11/12 | Genbank | Kono         | SL3.1.2 |
| NICD3089_SLE_PL_2014-11-12                       | 14/11/12 | NICD    | Port Loko    | SL3.1.2 |
| NICD3087_SLE_WUR_2014-11-13                      | 14/11/13 | NICD    | WAU          | SL3.1.2 |
| NICD3335_SLE_WR_2014-11-16                       | 14/11/16 | NICD    | WAR          | SL3.1.2 |
| NICD3483-Vero_SLE_WUR_2014-11-18                 | 14/11/18 | NICD    | WAU          | SL3.1.2 |
| NICD3596_SLE_WUR_2014-11-21                      | 14/11/21 | NICD    | WAU          | SL3.1.2 |
| EBOV_20146001_KR653237_SLE_Kono_2014-11-24       | 14/11/24 | Genbank | Kono         | SL3.1.2 |
| NICD3707_SLE_WUR_2014-11-24                      | 14/11/24 | NICD    | WAU          | SL3.1.2 |
| NICD3823_SLE_WR_2014-11-25                       | 14/11/25 | NICD    | WAR          | SL3.1.2 |
| NICD3820_SLE_WUR_2014-11-25                      | 14/11/25 | NICD    | WAU          | SL3.1.2 |
| NICD3928_SLE_WUR_2014-11-26                      | 14/11/26 | NICD    | WAU          | SL3.1.2 |
| NICD3932_SLE_WUR_2014-11-26                      | 14/11/26 | NICD    | WAU          | SL3.1.2 |
| NICD3937_SLE_WUR_2014-11-26                      | 14/11/26 | NICD    | WAU          | SL3.1.2 |
| NICD3925_SLE_WUR_2014-11-27                      | 14/11/27 | NICD    | WAU          | SL3.1.2 |
| NICD4055_SLE_WUR_2014-11-28                      | 14/11/28 | NICD    | WAU          | SL3.1.2 |
| NICD4025-Vero_SLE_WUR_2014-11-29                 | 14/11/29 | NICD    | WAU          | SL3.1.2 |
| NICD4064-swab_SLE_WUR_2014-11-29                 | 14/11/29 | NICD    | WAU          | SL3.1.2 |
| NICD4279-Vero_SLE_WUR_2014-12-05                 | 14/12/05 | NICD    | WAU          | SL3.1.2 |
| EBOV_KT2449_KU296465_SLE_WesternUrban_2014-12-05 | 14/12/05 | Genbank | WAU          | SL3.1.2 |
| NICD4682_SLE_WUR_2014-12-13                      | 14/12/13 | NICD    | WAU          | SL3.1.2 |
| NICD4830_SLE_WUR_2014-12-15                      | 14/12/15 | NICD    | WAU          | SL3.1.2 |
| EBOV_MK0384_KU296628_SLE_Bombali_2014-12-22      | 14/12/22 | Genbank | Bombali      | SL3.1.2 |
| EBOV_MK0464_KU296835_SLE_UNKNOWN_2014-12-24      | 14/12/24 | Genbank | UNKNOWN      | SL3.1.2 |
| NICD5200_SLE_WUR_2014-12-24                      | 14/12/24 | NICD    | WAU          | SL3.1.2 |
| NICD5260_SLE_WUR_2014-12-24                      | 14/12/24 | NICD    | WAU          | SL3.1.2 |
| NICD5266_SLE_WUR_2014-12-24                      | 14/12/24 | NICD    | WAU          | SL3.1.2 |
| NICD5314_SLE_WUR_2014-12-26                      | 14/12/26 | NICD    | WAU          | SL3.1.2 |
| NICD5354_SLE_WUR_2014-12-27                      | 14/12/27 | NICD    | WAU          | SL3.1.2 |
| NICD5360_SLE_WUR_2014-12-27                      | 14/12/27 | NICD    | WAU          | SL3.1.2 |
| EBOV_77524_EMLK_KU296368_SLE_2014-12-30          | 14/12/30 | Genbank | UNKNOWN      | SL3.1.2 |

|                                                      |          |         |           |         |
|------------------------------------------------------|----------|---------|-----------|---------|
| EBOV_77529_EMLK_KU296477_SLE_2014-12-30              | 14/12/30 | Genbank | UNKNOWN   | SL3.1.2 |
| EBOV_77551_EMLK_KU296808_SLE_2015-01-01              | 15/01/01 | Genbank | UNKNOWN   | SL3.1.2 |
| EBOV_77572_EMLK_KU296508_SLE_2015-01-03              | 15/01/03 | Genbank | UNKNOWN   | SL3.1.2 |
| EBOV_PL1387_KU296434_SLE_PortLoko_2015-01-04         | 15/01/04 | Genbank | Port Loko | SL3.1.2 |
| EBOV_MK0865_KU296500_SLE_UNKNOWN_2015-01-05          | 15/01/05 | Genbank | UNKNOWN   | SL3.1.2 |
| EBOV_MK0866_KU296497_SLE_UNKNOWN_2015-01-05          | 15/01/05 | Genbank | UNKNOWN   | SL3.1.2 |
| EBOV_MK0867_KU296748_SLE_UNKNOWN_2015-01-05          | 15/01/05 | Genbank | UNKNOWN   | SL3.1.2 |
| EBOV_77601_EMLK_KU296826_SLE_WesternUrban_2015-01-05 | 15/01/05 | Genbank | WAU       | SL3.1.2 |
| EBOV_MK0885_KU296758_SLE_Bombali_2015-01-06          | 15/01/06 | Genbank | Bombali   | SL3.1.2 |
| EBOV_MK0888_KU296376_SLE_UNKNOWN_2015-01-06          | 15/01/06 | Genbank | UNKNOWN   | SL3.1.2 |
| EBOV_MK0889_KU296794_SLE_UNKNOWN_2015-01-06          | 15/01/06 | Genbank | UNKNOWN   | SL3.1.2 |
| NICD5725_SLE_WUR_2015-01-07                          | 15/01/07 | NICD    | WAU       | SL3.1.2 |
| EBOV_MK1040_KU296528_SLE_Bombali_2015-01-11          | 15/01/11 | Genbank | Bombali   | SL3.1.2 |
| EBOV_MK1079_KU296815_SLE_Bombali_2015-01-11          | 15/01/11 | Genbank | Bombali   | SL3.1.2 |
| EBOV_DML24502_KT357825_SLE_Kono_2015-01-13           | 15/01/13 | Genbank | Kono      | SL3.1.2 |
| EBOV_DML24504_KT357826_SLE_Kono_2015-01-13           | 15/01/13 | Genbank | Kono      | SL3.1.2 |
| EBOV_75674_EMLH_KU296350_SLE_WesternUrban_2015-01-13 | 15/01/13 | Genbank | WAU       | SL3.1.2 |
| EBOV_DML24506_KT357827_SLE_Kono_2015-01-14           | 15/01/14 | Genbank | Kono      | SL3.1.2 |
| EBOV_DML24511_KT357828_SLE_Kono_2015-01-14           | 15/01/14 | Genbank | Kono      | SL3.1.2 |
| EBOV_75731_EMLH_KU296564_SLE_WesternUrban_2015-01-16 | 15/01/16 | Genbank | WAU       | SL3.1.2 |
| EBOV_DML24552_KT357829_SLE_Kono_2015-01-17           | 15/01/17 | Genbank | Kono      | SL3.1.2 |
| EBOV_DML24553_KT357830_SLE_Kono_2015-01-17           | 15/01/17 | Genbank | Kono      | SL3.1.2 |
| EBOV_DML24573_KT357831_SLE_Kono_2015-01-18           | 15/01/18 | Genbank | Kono      | SL3.1.2 |
| EBOV_DML24581_KT357832_SLE_Kono_2015-01-19           | 15/01/19 | Genbank | Kono      | SL3.1.2 |
| EBOV_DML24592_KT357833_SLE_Kono_2015-01-20           | 15/01/20 | Genbank | Kono      | SL3.1.2 |
| EBOV_DML24601_KT357834_SLE_Kono_2015-01-20           | 15/01/20 | Genbank | Kono      | SL3.1.2 |
| EBOV_DML24604_KT357835_SLE_Kono_2015-01-20           | 15/01/20 | Genbank | Kono      | SL3.1.2 |
| EBOV_DML24605_KT357836_SLE_Kono_2015-01-20           | 15/01/20 | Genbank | Kono      | SL3.1.2 |
| EBOV_DML24606_KT357837_SLE_Kono_2015-01-20           | 15/01/20 | Genbank | Kono      | SL3.1.2 |
| EBOV_DML24608_KT357838_SLE_Kono_2015-01-20           | 15/01/20 | Genbank | Kono      | SL3.1.2 |
| NICD6123_SLE_WR_2015-01-20                           | 15/01/20 | NICD    | WAR       | SL3.1.2 |
| EBOV_DML24611_KT357839_SLE_Kono_2015-01-21           | 15/01/21 | Genbank | Kono      | SL3.1.2 |
| EBOV_DML24620_KT357840_SLE_Kono_2015-01-21           | 15/01/21 | Genbank | Kono      | SL3.1.2 |
| EBOV_361_EMLH_KU296420_SLE_WesternUrban_2015-01-21   | 15/01/21 | Genbank | WAU       | SL3.1.2 |



|                                                    |          |         |           |         |
|----------------------------------------------------|----------|---------|-----------|---------|
| NICD6141_SLE_WR_2015-01-21                         | 15/01/21 | NICD    | WAR       | SL3.1.2 |
| NICD6218_SLE_WUR_2015-01-24                        | 15/01/24 | NICD    | WAU       | SL3.1.2 |
| EBOV_DML24669_KT357841_SLE_Kono_2015-01-25         | 15/01/25 | Genbank | Kono      | SL3.1.2 |
| EBOV_DML24677_KT357842_SLE_Kono_2015-01-25         | 15/01/25 | Genbank | Kono      | SL3.1.2 |
| EBOV_DML24683_KT357843_SLE_Kono_2015-01-26         | 15/01/26 | Genbank | Kono      | SL3.1.2 |
| NICD6274_SLE_WUR_2015-01-26                        | 15/01/26 | NICD    | WAU       | SL3.1.2 |
| EBOV_DML24706_KT357844_SLE_Kono_2015-01-28         | 15/01/28 | Genbank | Kono      | SL3.1.2 |
| EBOV_DML24720_KT357846_SLE_Kono_2015-01-29         | 15/01/29 | Genbank | Kono      | SL3.1.2 |
| EBOV_473_EMLH_KU296524_SLE_UNKNOWN_2015-01-29      | 15/01/29 | Genbank | UNKNOWN   | SL3.1.2 |
| EBOV_KT4553_KU296698_SLE_UNKNOWN_2015-01-29        | 15/01/29 | Genbank | UNKNOWN   | SL3.1.2 |
| EBOV_KT4555_KU296687_SLE_UNKNOWN_2015-01-29        | 15/01/29 | Genbank | UNKNOWN   | SL3.1.2 |
| NICD6365_SLE_WR_2015-01-29                         | 15/01/29 | NICD    | WAR       | SL3.1.2 |
| EBOV_DML24758_KT357847_SLE_Kono_2015-01-30         | 15/01/30 | Genbank | Kono      | SL3.1.2 |
| EBOV_490_EMLH_KU296746_SLE_UNKNOWN_2015-01-30      | 15/01/30 | Genbank | UNKNOWN   | SL3.1.2 |
| EBOV_491_EMLH_KU296588_SLE_UNKNOWN_2015-01-30      | 15/01/30 | Genbank | UNKNOWN   | SL3.1.2 |
| EBOV_508_EMLH_KU296304_SLE_WesternUrban_2015-01-31 | 15/01/31 | Genbank | WAU       | SL3.1.2 |
| EBOV_539_EMLH_KU296823_SLE_WesternUrban_2015-02-02 | 15/02/02 | Genbank | WAU       | SL3.1.2 |
| EBOV_DML24818_KT357848_SLE_Kono_2015-02-03         | 15/02/03 | Genbank | Kono      | SL3.1.2 |
| EBOV_567_EMLH_KU296427_SLE_UNKNOWN_2015-02-03      | 15/02/03 | Genbank | UNKNOWN   | SL3.1.2 |
| EBOV_KT4663_KU296570_SLE_UNKNOWN_2015-02-03        | 15/02/03 | Genbank | UNKNOWN   | SL3.1.2 |
| EBOV_DML24825_KT357849_SLE_Tonkolili_2015-02-04    | 15/02/04 | Genbank | Tonkolili | SL3.1.2 |
| EBOV_592_EMLH_KU296447_SLE_UNKNOWN_2015-02-05      | 15/02/05 | Genbank | UNKNOWN   | SL3.1.2 |
| EBOV_DML24853_KT357850_SLE_Kono_2015-02-06         | 15/02/06 | Genbank | Kono      | SL3.1.2 |
| EBOV_DML24854_KT357851_SLE_Kono_2015-02-06         | 15/02/06 | Genbank | Kono      | SL3.1.2 |
| EBOV_704_EMLH_KU296721_SLE_UNKNOWN_2015-02-09      | 15/02/09 | Genbank | UNKNOWN   | SL3.1.2 |
| EBOV_DML25123_KT357854_SLE_Kenema_2015-02-18       | 15/02/18 | Genbank | Kenema    | SL3.1.2 |
| EBOV_DML25083_KT357852_SLE_Kono_2015-02-18         | 15/02/18 | Genbank | Kono      | SL3.1.2 |
| EBOV_DML25103_KT357853_SLE_Kono_2015-02-19         | 15/02/19 | Genbank | Kono      | SL3.1.2 |
| EBOV_PL4119_KU296645_SLE_PortLoko_2015-02-28       | 15/02/28 | Genbank | Port Loko | SL3.1.2 |
| EBOV_PL4197_KU296299_SLE_PortLoko_2015-03-02       | 15/03/02 | Genbank | Port Loko | SL3.1.2 |
| EBOV_PL4203_KU296311_SLE_PortLoko_2015-03-02       | 15/03/02 | Genbank | Port Loko | SL3.1.2 |
| EBOV_PL4248_KU296658_SLE_PortLoko_2015-03-03       | 15/03/03 | Genbank | Port Loko | SL3.1.2 |
| EBOV_PL4249_KU296349_SLE_PortLoko_2015-03-03       | 15/03/03 | Genbank | Port Loko | SL3.1.2 |
| EBOV_PL4283_KU296840_SLE_PortLoko_2015-03-03       | 15/03/03 | Genbank | Port Loko | SL3.1.2 |

|                                                 |          |         |           |         |
|-------------------------------------------------|----------|---------|-----------|---------|
| EBOV_PL4284_KU296829_SLE_PortLoko_2015-03-03    | 15/03/03 | Genbank | Port Loko | SL3.1.2 |
| EBOV_PL4443_KU296418_SLE_PortLoko_2015-03-07    | 15/03/07 | Genbank | Port Loko | SL3.1.2 |
| EBOV_PL4785_KU296688_SLE_PortLoko_2015-03-14    | 15/03/14 | Genbank | Port Loko | SL3.1.2 |
| EBOV_PL4813_KU296798_SLE_PortLoko_2015-03-14    | 15/03/14 | Genbank | Port Loko | SL3.1.2 |
| EBOV_PL4804_KU296766_SLE_PortLoko_2015-03-15    | 15/03/15 | Genbank | Port Loko | SL3.1.2 |
| EBOV_PL4844_KU296527_SLE_PortLoko_2015-03-16    | 15/03/16 | Genbank | Port Loko | SL3.1.2 |
| EBOV_PL4886_KU296461_SLE_PortLoko_2015-03-16    | 15/03/16 | Genbank | Port Loko | SL3.1.2 |
| EBOV_PL4932_KU296547_SLE_PortLoko_2015-03-18    | 15/03/18 | Genbank | Port Loko | SL3.1.2 |
| EBOV_PL5133_KU296489_SLE_PortLoko_2015-03-21    | 15/03/21 | Genbank | Port Loko | SL3.1.2 |
| EBOV_PL5275_KU296439_SLE_PortLoko_2015-03-24    | 15/03/24 | Genbank | Port Loko | SL3.1.2 |
| EBOV_PL5534_KU296784_SLE_PortLoko_2015-03-29    | 15/03/29 | Genbank | Port Loko | SL3.1.2 |
| EBOV_PL5674_KU296699_SLE_PortLoko_2015-03-31    | 15/03/31 | Genbank | Port Loko | SL3.1.2 |
| EBOV_PL5950_KU296559_SLE_PortLoko_2015-04-08    | 15/04/08 | Genbank | Port Loko | SL3.1.2 |
| EBOV_G3752_KM233061_SLE_Kailahun_2014-06-10     | 14/06/10 | Genbank | Kailahun  | SL3.2   |
| EBOV_G3825_KM233098_SLE_Kailahun_2014-06-16     | 14/06/16 | Genbank | Kailahun  | SL3.2   |
| EBOV_G3829_KM233102_SLE_Kailahun_2014-06-16     | 14/06/16 | Genbank | Kailahun  | SL3.2   |
| EBOV_G3834_KM233104_SLE_Kailahun_2014-06-17     | 14/06/17 | Genbank | Kailahun  | SL3.2   |
| EBOV_G3855_KR105203_SLE_Kenema_2014-06-17       | 14/06/17 | Genbank | Kenema    | SL3.2   |
| EBOV_G3848_KM233110_SLE_Kailahun_2014-06-18     | 14/06/18 | Genbank | Kailahun  | SL3.2   |
| EBOV_G3857_KM233115_SLE_Kailahun_2014-06-18     | 14/06/18 | Genbank | Kailahun  | SL3.2   |
| EBOV_G3851_KM233112_SLE_Kenema_2014-06-18       | 14/06/18 | Genbank | Kenema    | SL3.2   |
| EBOV_G3851_KR105202_SLE_Kenema_2014-06-18       | 14/06/18 | Genbank | Kenema    | SL3.2   |
| EBOV_G3886_KR105204_SLE_Kenema_2014-06-19       | 14/06/19 | Genbank | Kenema    | SL3.2   |
| EBOV_G3889_KR105205_SLE_Kenema_2014-06-19       | 14/06/19 | Genbank | Kenema    | SL3.2   |
| EBOV_G3913_KR105206_SLE_Kenema_2014-06-21       | 14/06/21 | Genbank | Kenema    | SL3.2   |
| EBOV_G4132_KR105213_SLE_Kenema_2014-07-05       | 14/07/05 | Genbank | Kenema    | SL3.2   |
| EBOV_G4200_KR105217_SLE_Kenema_2014-07-08       | 14/07/08 | Genbank | Kenema    | SL3.2   |
| EBOV_G4255_KR105226_SLE_Kailahun_2014-07-11     | 14/07/11 | Genbank | Kailahun  | SL3.2   |
| EBOV_G4263_KR105227_SLE_Kenema_2014-07-11       | 14/07/11 | Genbank | Kenema    | SL3.2   |
| EBOV_G4264_KR105228_SLE_Kenema_2014-07-11       | 14/07/11 | Genbank | Kenema    | SL3.2   |
| EBOV_EM_080265_KR817244_SLE_Kailahun_2014-07-12 | 14/07/12 | Genbank | Kailahun  | SL3.2   |
| EBOV_G4329_KR105235_SLE_Kailahun_2014-07-14     | 14/07/14 | Genbank | Kailahun  | SL3.2   |
| EBOV_G4323_KR105232_SLE_Kenema_2014-07-14       | 14/07/14 | Genbank | Kenema    | SL3.2   |
| EBOV_G4334_KR105237_SLE_Kenema_2014-07-14       | 14/07/14 | Genbank | Kenema    | SL3.2   |

|                                                       |          |         |           |       |
|-------------------------------------------------------|----------|---------|-----------|-------|
| EBOV_G4347_KR105240_SLE_Kenema_2014-07-15             | 14/07/15 | Genbank | Kenema    | SL3.2 |
| EBOV_G4423_KR105251_SLE_Kailahun_2014-07-19           | 14/07/19 | Genbank | Kailahun  | SL3.2 |
| EBOV_G4424_KR105252_SLE_Kailahun_2014-07-19           | 14/07/19 | Genbank | Kailahun  | SL3.2 |
| EBOV_G4431_KR105253_SLE_Bo_2014-07-20                 | 14/07/20 | Genbank | Bo        | SL3.2 |
| EBOV_G4454_KR105258_SLE_Kailahun_2014-07-21           | 14/07/21 | Genbank | Kailahun  | SL3.2 |
| EBOV_G4466_KR105260_SLE_Bo_2014-07-22                 | 14/07/22 | Genbank | Bo        | SL3.2 |
| EBOV_G4683_KR105262_SLE_UNKNOWN_2014-08-01            | 14/08/01 | Genbank | UNKNOWN   | SL3.2 |
| EBOV_G4698_KR105263_SLE_Kenema_2014-08-03             | 14/08/03 | Genbank | Kenema    | SL3.2 |
| EBOV_G4717_KR105266_SLE_Kenema_2014-08-04             | 14/08/04 | Genbank | Kenema    | SL3.2 |
| EBOV_G4465_KR105259_SLE_Kenema_2014-08-05             | 14/08/05 | Genbank | Kenema    | SL3.2 |
| EBOV_G4730_KR105268_SLE_Kenema_2014-08-05             | 14/08/05 | Genbank | Kenema    | SL3.2 |
| EBOV_G4736_KR105269_SLE_Kenema_2014-08-05             | 14/08/05 | Genbank | Kenema    | SL3.2 |
| EBOV_G4748_KR105270_SLE_UNKNOWN_2014-08-05            | 14/08/05 | Genbank | UNKNOWN   | SL3.2 |
| EBOV_G4981_KR105287_SLE_UNKNOWN_2014-08-14            | 14/08/14 | Genbank | UNKNOWN   | SL3.2 |
| EBOV_G4982_KR105288_SLE_UNKNOWN_2014-08-14            | 14/08/14 | Genbank | UNKNOWN   | SL3.2 |
| EBOV_G4996_KR105290_SLE_UNKNOWN_2014-08-15            | 14/08/15 | Genbank | UNKNOWN   | SL3.2 |
| EBOV_G5039_KR105295_SLE_Kenema_2014-08-17             | 14/08/17 | Genbank | Kenema    | SL3.2 |
| NICD0023_SLE_TONK_2014-08-26                          | 14/08/26 | NICD    | Tonkolili | SL3.2 |
| EBOV_20140489_KR653235_SLE_Kenema_2014-09-04          | 14/09/04 | Genbank | Kenema    | SL3.2 |
| EBOV_20140590_KR653278_SLE_Kenema_2014-09-07          | 14/09/07 | Genbank | Kenema    | SL3.2 |
| NICD0520_SLE_BOM_2014-09-11                           | 14/09/11 | NICD    | Bombali   | SL3.2 |
| EBOV_Makona-201403147_KP240931_SLE_UNKNOWN_2014-09-13 | 14/09/13 | Genbank | UNKNOWN   | SL3.2 |
| EBOV_J0162_KP759622_SLE_Kambia_2014-11-09             | 14/11/09 | Genbank | Kambia    | SL3.2 |
| EBOV_KT2669_KU296726_SLE_UNKNOWN_2014-12-13           | 14/12/13 | Genbank | UNKNOWN   | SL3.2 |
| NICD5279-swab_SLE_WUR_2014-12-24                      | 14/12/24 | NICD    | WAU       | SL3.2 |
| EBOV_77591_EMLK_KU296836_SLE_WesternUrban_2015-01-04  | 15/01/04 | Genbank | WAU       | SL3.2 |
| EBOV_KT4715_KU296707_SLE_UNKNOWN_2015-02-06           | 15/02/06 | Genbank | UNKNOWN   | SL3.2 |
| EBOV_PL4094_KU296476_SLE_Kambia_2015-02-27            | 15/02/27 | Genbank | Kambia    | SL3.2 |
| EBOV_PL4347_KU296720_SLE_Kambia_2015-03-04            | 15/03/04 | Genbank | Kambia    | SL3.2 |
| EBOV_PL4872_KU296419_SLE_Kambia_2015-03-16            | 15/03/16 | Genbank | Kambia    | SL3.2 |
| EBOV_PL5260_KU296591_SLE_Kambia_2015-03-23            | 15/03/23 | Genbank | Kambia    | SL3.2 |
| EBOV_PL5361_KU296415_SLE_Kambia_2015-03-26            | 15/03/26 | Genbank | Kambia    | SL3.2 |
| EBOV_PL5428_KU296532_SLE_Kambia_2015-03-27            | 15/03/27 | Genbank | Kambia    | SL3.2 |

|                                                |          |         |           |         |
|------------------------------------------------|----------|---------|-----------|---------|
| EBOV_PL5801_KU296844_SLE_Kambia_2015-04-04     | 15/04/04 | Genbank | Kambia    | SL3.2   |
| EBOV_PL5803_KU296795_SLE_Kambia_2015-04-04     | 15/04/04 | Genbank | Kambia    | SL3.2   |
| EBOV_PL6070_KU296614_SLE_Kambia_2015-04-11     | 15/04/11 | Genbank | Kambia    | SL3.2   |
| EBOV_PL6158_KU296308_SLE_Kambia_2015-04-13     | 15/04/13 | Genbank | Kambia    | SL3.2   |
| EBOV_14723_EML_KU296541_SLE_Kambia_2015-04-18  | 15/04/18 | Genbank | Kambia    | SL3.2   |
| EBOV_14729_EML_KU296392_SLE_Kambia_2015-04-18  | 15/04/18 | Genbank | Kambia    | SL3.2   |
| EBOV_14748_EML_KU296769_SLE_Kambia_2015-04-19  | 15/04/19 | Genbank | Kambia    | SL3.2   |
| EBOV_14750_EML_KU296459_SLE_Kambia_2015-04-20  | 15/04/20 | Genbank | Kambia    | SL3.2   |
| EBOV_14795_EMLK_KU296737_SLE_Kambia_2015-04-25 | 15/04/25 | Genbank | Kambia    | SL3.2   |
| EBOV_14859_EMLK_KU296438_SLE_Kambia_2015-04-30 | 15/04/30 | Genbank | Kambia    | SL3.2   |
| EBOV_G5295_KR105302_SLE_UNKNOWN_2014-08-25     | 14/08/25 | Genbank | UNKNOWN   | SL3.2.1 |
| EBOV_G5296_KR105303_SLE_UNKNOWN_2014-08-25     | 14/08/25 | Genbank | UNKNOWN   | SL3.2.1 |
| EBOV_20140134_KR653227_SLE_Bombali_2014-08-26  | 14/08/26 | Genbank | Bombali   | SL3.2.1 |
| NICD0787_SLE_BOM_2014-09-17                    | 14/09/17 | NICD    | Bombali   | SL3.2.1 |
| NICD0689_SLE_TONK_2014-09-17                   | 14/09/17 | NICD    | Tonkolili | SL3.2.1 |
| NICD1109_SLE_BOM_2014-09-19                    | 14/09/19 | NICD    | Bombali   | SL3.2.1 |
| NICD1081_SLE_BOM_2014-09-20                    | 14/09/20 | NICD    | Bombali   | SL3.2.1 |
| NICD1092_SLE_BOM_2014-09-20                    | 14/09/20 | NICD    | Bombali   | SL3.2.1 |
| NICD0905_SLE_TONK_2014-09-20                   | 14/09/20 | NICD    | Tonkolili | SL3.2.1 |
| NICD0908_SLE_TONK_2014-09-20                   | 14/09/20 | NICD    | Tonkolili | SL3.2.1 |
| NICD0911_SLE_TONK_2014-09-20                   | 14/09/20 | NICD    | Tonkolili | SL3.2.1 |
| NICD1091_SLE_BOM_2014-09-20                    | 14/09/20 | NICD    | Bombali   | SL3.2.1 |
| NICD1105_SLE_BOM_2014-09-21                    | 14/09/21 | NICD    | Bombali   | SL3.2.1 |
| NICD0964_SLE_TONK_2014-09-21                   | 14/09/21 | NICD    | Tonkolili | SL3.2.1 |
| NICD1227_SLE_BOM_2014-09-22                    | 14/09/22 | NICD    | Bombali   | SL3.2.1 |
| NICD1256-Vero_SLE_BOM_2014-09-22               | 14/09/22 | NICD    | Bombali   | SL3.2.1 |
| NICD1261_SLE_BOM_2014-09-22                    | 14/09/22 | NICD    | Bombali   | SL3.2.1 |
| NICD1272-Vero_SLE_BOM_2014-09-22               | 14/09/22 | NICD    | Bombali   | SL3.2.1 |
| NICD1142_SLE_PL_2014-09-22                     | 14/09/22 | NICD    | Port Loko | SL3.2.1 |
| NICD1143_SLE_PL_2014-09-23                     | 14/09/23 | NICD    | Port Loko | SL3.2.1 |
| NICD1136_SLE_WR_2014-09-23                     | 14/09/23 | NICD    | WAR       | SL3.2.1 |
| NICD1329-Vero_SLE_BOM_2014-09-24               | 14/09/24 | NICD    | Bombali   | SL3.2.1 |
| EBOV_J0019_KP759754_SLE_Bombali_2014-09-25     | 14/09/25 | Genbank | Bombali   | SL3.2.1 |
| EBOV_J0020_KP759755_SLE_Bombali_2014-09-25     | 14/09/25 | Genbank | Bombali   | SL3.2.1 |

|                                                 |          |         |           |         |
|-------------------------------------------------|----------|---------|-----------|---------|
| EBOV_J0022_KP759757_SLE_Bombali_2014-09-25      | 14/09/25 | Genbank | Bombali   | SL3.2.1 |
| EBOV_20141232_KR653266_SLE_Tonkolili_2014-09-25 | 14/09/25 | Genbank | Tonkolili | SL3.2.1 |
| EBOV_J0015_KP759741_SLE_Bombali_2014-09-26      | 14/09/26 | Genbank | Bombali   | SL3.2.1 |
| EBOV_J0017_KP759747_SLE_Bombali_2014-09-26      | 14/09/26 | Genbank | Bombali   | SL3.2.1 |
| EBOV_J0021_KP759756_SLE_Bombali_2014-09-29      | 14/09/29 | Genbank | Bombali   | SL3.2.1 |
| EBOV_20141497_KR653273_SLE_Bombali_2014-10-01   | 14/10/01 | Genbank | Bombali   | SL3.2.1 |
| EBOV_20141960_KR653283_SLE_Tonkolili_2014-10-09 | 14/10/09 | Genbank | Tonkolili | SL3.2.1 |
| EBOV_20142127_KR653234_SLE_Bombali_2014-10-12   | 14/10/12 | Genbank | Bombali   | SL3.2.1 |
| EBOV_20142260_KR653262_SLE_Bombali_2014-10-14   | 14/10/14 | Genbank | Bombali   | SL3.2.1 |
| EBOV_20142843_KR653301_SLE_Bombali_2014-10-23   | 14/10/23 | Genbank | Bombali   | SL3.2.1 |
| EBOV_20142856_KR653302_SLE_Tonkolili_2014-10-24 | 14/10/24 | Genbank | Tonkolili | SL3.2.1 |
| EBOV_20143107_KR653247_SLE_Bombali_2014-10-25   | 14/10/25 | Genbank | Bombali   | SL3.2.1 |
| EBOV_J0096_KP759654_SLE_WesternUrban_2014-10-27 | 14/10/27 | Genbank | WAU       | SL3.2.1 |
| EBOV_J0123_KP759672_SLE_WesternRural_2014-11-01 | 14/11/01 | Genbank | WAR       | SL3.2.1 |
| EBOV_J0152_KP759614_SLE_WesternRural_2014-11-07 | 14/11/07 | Genbank | WAR       | SL3.2.1 |
| EBOV_J0160_KP759621_SLE_WesternRural_2014-11-07 | 14/11/07 | Genbank | WAR       | SL3.2.1 |
| EBOV_20144192_KR653238_SLE_Bombali_2014-11-08   | 14/11/08 | Genbank | Bombali   | SL3.2.1 |
| EBOV_20144837_KR653259_SLE_Bombali_2014-11-14   | 14/11/14 | Genbank | Bombali   | SL3.2.1 |
| NICD3208-Vero_SLE_WR_2014-11-14                 | 14/11/14 | NICD    | WAR       | SL3.2.1 |
| NICD3294_SLE_WR_2014-11-14                      | 14/11/14 | NICD    | WAR       | SL3.2.1 |
| NICD3608-Vero_SLE_WR_2014-11-21                 | 14/11/21 | NICD    | WAR       | SL3.2.1 |
| NICD3693-Vero_SLE_WR_2014-11-23                 | 14/11/23 | NICD    | WAR       | SL3.2.1 |
| EBOV_20145835_KR653295_SLE_Tonkolili_2014-11-25 | 14/11/25 | Genbank | Tonkolili | SL3.2.1 |
| EBOV_MK0024_KU296705_SLE_Bombali_2014-12-08     | 14/12/08 | Genbank | Bombali   | SL3.2.1 |
| EBOV_MK0045_KU296776_SLE_Bombali_2014-12-09     | 14/12/09 | Genbank | Bombali   | SL3.2.1 |
| NICD4513-Vero_SLE_WUR_2014-12-09                | 14/12/09 | NICD    | WAU       | SL3.2.1 |
| EBOV_MK0085_KU296738_SLE_Bombali_2014-12-10     | 14/12/10 | Genbank | Bombali   | SL3.2.1 |
| NICD4691_SLE_WUR_2014-12-11                     | 14/12/11 | NICD    | WAU       | SL3.2.1 |
| EBOV_KT2641_KU296709_SLE_UNKNOWN_2014-12-12     | 14/12/12 | Genbank | UNKNOWN   | SL3.2.1 |
| NICD4670_SLE_WUR_2014-12-12                     | 14/12/12 | NICD    | WAU       | SL3.2.1 |
| NICD4672_SLE_WUR_2014-12-12                     | 14/12/12 | NICD    | WAU       | SL3.2.1 |
| NICD4692_SLE_WUR_2014-12-13                     | 14/12/13 | NICD    | WAU       | SL3.2.1 |
| EBOV_KT2810_KU296778_SLE_UNKNOWN_2014-12-16     | 14/12/16 | Genbank | UNKNOWN   | SL3.2.1 |
| EBOV_MK0364_KU296453_SLE_Bombali_2014-12-21     | 14/12/21 | Genbank | Bombali   | SL3.2.1 |

|                                                 |          |         |           |         |
|-------------------------------------------------|----------|---------|-----------|---------|
| EBOV_MK0365_KU296406_SLE_Bombali_2014-12-21     | 14/12/21 | Genbank | Bombali   | SL3.2.1 |
| EBOV_MK0366_KU296320_SLE_Bombali_2014-12-21     | 14/12/21 | Genbank | Bombali   | SL3.2.1 |
| EBOV_MK0367_KU296770_SLE_Bombali_2014-12-21     | 14/12/21 | Genbank | Bombali   | SL3.2.1 |
| EBOV_MK0368_KU296718_SLE_Bombali_2014-12-21     | 14/12/21 | Genbank | Bombali   | SL3.2.1 |
| EBOV_MK0369_KU296413_SLE_Bombali_2014-12-21     | 14/12/21 | Genbank | Bombali   | SL3.2.1 |
| EBOV_MK0363_KU296545_SLE_UNKNOWN_2014-12-21     | 14/12/21 | Genbank | UNKNOWN   | SL3.2.1 |
| EBOV_MK0375_KU296606_SLE_Bombali_2014-12-22     | 14/12/22 | Genbank | Bombali   | SL3.2.1 |
| EBOV_MK0379_KU296480_SLE_Bombali_2014-12-22     | 14/12/22 | Genbank | Bombali   | SL3.2.1 |
| EBOV_MK0388_KU296630_SLE_Bombali_2014-12-22     | 14/12/22 | Genbank | Bombali   | SL3.2.1 |
| EBOV_MK0390_KU296398_SLE_Bombali_2014-12-22     | 14/12/22 | Genbank | Bombali   | SL3.2.1 |
| EBOV_MK0392_KU296691_SLE_Bombali_2014-12-22     | 14/12/22 | Genbank | Bombali   | SL3.2.1 |
| EBOV_20146553_KR653224_SLE_Koinadugu_2014-12-22 | 14/12/22 | Genbank | Koinadugu | SL3.2.1 |
| EBOV_MK0393_KU296496_SLE_UNKNOWN_2014-12-22     | 14/12/22 | Genbank | UNKNOWN   | SL3.2.1 |
| EBOV_MK0425_KU296379_SLE_Bombali_2014-12-23     | 14/12/23 | Genbank | Bombali   | SL3.2.1 |
| EBOV_MK0431_KU296621_SLE_Bombali_2014-12-23     | 14/12/23 | Genbank | Bombali   | SL3.2.1 |
| EBOV_MK0433_KU296845_SLE_Bombali_2014-12-23     | 14/12/23 | Genbank | Bombali   | SL3.2.1 |
| EBOV_MK0434_KU296554_SLE_Bombali_2014-12-23     | 14/12/23 | Genbank | Bombali   | SL3.2.1 |
| EBOV_MK0491_KU296510_SLE_Bombali_2014-12-23     | 14/12/23 | Genbank | Bombali   | SL3.2.1 |
| EBOV_MK0531_KU296448_SLE_Bombali_2014-12-26     | 14/12/26 | Genbank | Bombali   | SL3.2.1 |
| EBOV_MK0533_KU296436_SLE_UNKNOWN_2014-12-26     | 14/12/26 | Genbank | UNKNOWN   | SL3.2.1 |
| EBOV_MK0549_KU296825_SLE_Bombali_2014-12-27     | 14/12/27 | Genbank | Bombali   | SL3.2.1 |
| EBOV_MK0551_KU296717_SLE_UNKNOWN_2014-12-27     | 14/12/27 | Genbank | UNKNOWN   | SL3.2.1 |
| EBOV_MK0584_KU296339_SLE_Bombali_2014-12-28     | 14/12/28 | Genbank | Bombali   | SL3.2.1 |
| EBOV_MK0575_KU296681_SLE_UNKNOWN_2014-12-28     | 14/12/28 | Genbank | UNKNOWN   | SL3.2.1 |
| EBOV_MK0607_KU296335_SLE_UNKNOWN_2014-12-28     | 14/12/28 | Genbank | UNKNOWN   | SL3.2.1 |
| EBOV_MK0664_KU296761_SLE_UNKNOWN_2014-12-30     | 14/12/30 | Genbank | UNKNOWN   | SL3.2.1 |
| EBOV_MK0709_KU296373_SLE_Tonkolili_2014-12-31   | 14/12/31 | Genbank | Tonkolili | SL3.2.1 |
| EBOV_MK0723_KU296610_SLE_2015-01-01             | 15/01/01 | Genbank | UNKNOWN   | SL3.2.1 |
| EBOV_MK0766_KU296777_SLE_UNKNOWN_2015-01-02     | 15/01/02 | Genbank | UNKNOWN   | SL3.2.1 |
| EBOV_MK0869_KU296534_SLE_Bombali_2015-01-05     | 15/01/05 | Genbank | Bombali   | SL3.2.1 |
| EBOV_MK0849_KU296323_SLE_UNKNOWN_2015-01-05     | 15/01/05 | Genbank | UNKNOWN   | SL3.2.1 |
| EBOV_MK0857_KU296789_SLE_UNKNOWN_2015-01-05     | 15/01/05 | Genbank | UNKNOWN   | SL3.2.1 |
| EBOV_MK0868_KU296537_SLE_UNKNOWN_2015-01-05     | 15/01/05 | Genbank | UNKNOWN   | SL3.2.1 |
| EBOV_MK0966_KU296507_SLE_Bombali_2015-01-08     | 15/01/08 | Genbank | Bombali   | SL3.2.1 |

|                                                    |          |         |           |         |
|----------------------------------------------------|----------|---------|-----------|---------|
| EBOV_MK1000_KU296384_SLE_Bombali_2015-01-10        | 15/01/10 | Genbank | Bombali   | SL3.2.1 |
| EBOV_MK1014_KU296316_SLE_Bombali_2015-01-10        | 15/01/10 | Genbank | Bombali   | SL3.2.1 |
| EBOV_MK1036_KU296834_SLE_Bombali_2015-01-11        | 15/01/11 | Genbank | Bombali   | SL3.2.1 |
| EBOV_KT4054_KU296429_SLE_UNKNOWN_2015-01-13        | 15/01/13 | Genbank | UNKNOWN   | SL3.2.1 |
| EBOV_MK1197_KU296301_SLE_Bombali_2015-01-17        | 15/01/17 | Genbank | Bombali   | SL3.2.1 |
| EBOV_MK1202_KU296581_SLE_Bombali_2015-01-17        | 15/01/17 | Genbank | Bombali   | SL3.2.1 |
| EBOV_MK1320_KU296354_SLE_Bombali_2015-01-20        | 15/01/20 | Genbank | Bombali   | SL3.2.1 |
| EBOV_466_EMLH_KU296433_SLE_WesternUrban_2015-01-28 | 15/01/28 | Genbank | WAU       | SL3.2.1 |
| EBOV_PL2921_KU296506_SLE_Kambia_2015-02-03         | 15/02/03 | Genbank | Kambia    | SL3.2.1 |
| EBOV_MK1782_KU296792_SLE_UNKNOWN_2015-02-06        | 15/02/06 | Genbank | UNKNOWN   | SL3.2.1 |
| EBOV_MK1888_KU296708_SLE_UNKNOWN_2015-02-09        | 15/02/09 | Genbank | UNKNOWN   | SL3.2.1 |
| EBOV_KT4801_KU296722_SLE_UNKNOWN_2015-02-10        | 15/02/10 | Genbank | UNKNOWN   | SL3.2.1 |
| EBOV_MK4165_KU296575_SLE_Koinadugu_2015-04-16      | 15/04/16 | Genbank | Koinadugu | SL3.2.1 |
| EBOV_G4956_KR105282_SLE_Tonkolili_2014-08-13       | 14/08/13 | Genbank | Tonkolili | SL3.2.2 |
| EBOV_G4972_KR105285_SLE_Kenema_2014-08-14          | 14/08/14 | Genbank | Kenema    | SL3.2.2 |
| NICD0108_SLE_PL_2014-08-30                         | 14/08/30 | NICD    | Port Loko | SL3.2.2 |
| NICD0104_SLE_WR_2014-08-30                         | 14/08/30 | NICD    | WAR       | SL3.2.2 |
| EBOV_20140433_KR653246_SLE_Tonkolili_2014-09-03    | 14/09/03 | Genbank | Tonkolili | SL3.2.2 |
| NICD0338_SLE_PL_2014-09-08                         | 14/09/08 | NICD    | Port Loko | SL3.2.2 |
| NICD0424_SLE_TONK_2014-09-10                       | 14/09/10 | NICD    | Tonkolili | SL3.2.2 |
| NICD0720-Vero_SLE_PL_2014-09-16                    | 14/09/16 | NICD    | Port Loko | SL3.2.2 |
| NICD0721_SLE_PL_2014-09-16                         | 14/09/16 | NICD    | Port Loko | SL3.2.2 |
| NICD0878_SLE_PL_2014-09-20                         | 14/09/20 | NICD    | Port Loko | SL3.2.2 |
| NICD0894_SLE_PL_2014-09-20                         | 14/09/20 | NICD    | Port Loko | SL3.2.2 |
| NICD0899_SLE_PL_2014-09-20                         | 14/09/20 | NICD    | Port Loko | SL3.2.2 |
| NICD0900_SLE_PL_2014-09-20                         | 14/09/20 | NICD    | Port Loko | SL3.2.2 |
| NICD1049_SLE_PL_2014-09-21                         | 14/09/21 | NICD    | Port Loko | SL3.2.2 |
| EBOV_20141288_KR653232_SLE_PortLoko_2014-09-23     | 14/09/23 | Genbank | Port Loko | SL3.2.2 |
| NICD1396_SLE_PL_2014-09-25                         | 14/09/25 | NICD    | Port Loko | SL3.2.2 |
| EBOV_G5982_KR105332_SLE_UNKNOWN_2014-09-25         | 14/09/25 | Genbank | UNKNOWN   | SL3.2.2 |
| EBOV_G5986_KR105335_SLE_UNKNOWN_2014-09-25         | 14/09/25 | Genbank | UNKNOWN   | SL3.2.2 |
| EBOV_G5988_KR105336_SLE_UNKNOWN_2014-09-25         | 14/09/25 | Genbank | UNKNOWN   | SL3.2.2 |
| EBOV_J0013_KP759643_SLE_PortLoko_2014-09-28        | 14/09/28 | Genbank | Port Loko | SL3.2.2 |
| EBOV_J0011_KP759641_SLE_PortLoko_2014-09-29        | 14/09/29 | Genbank | Port Loko | SL3.2.2 |

|                                                      |          |         |              |         |
|------------------------------------------------------|----------|---------|--------------|---------|
| EBOV_J0012_KP759642_SLE_PortLoko_2014-09-29          | 14/09/29 | Genbank | Port Loko    | SL3.2.2 |
| EBOV_J0014_KP759740_SLE_PortLoko_2014-09-29          | 14/09/29 | Genbank | Port Loko    | SL3.2.2 |
| EBOV_J0029_KP759688_SLE_PortLoko_2014-09-29          | 14/09/29 | Genbank | Port Loko    | SL3.2.2 |
| EBOV_J0018_KP759644_SLE_WesternRural_2014-09-30      | 14/09/30 | Genbank | WAR          | SL3.2.2 |
| EBOV_J0030_KP759606_SLE_PortLoko_2014-10-03          | 14/10/03 | Genbank | Port Loko    | SL3.2.2 |
| EBOV_J0049_KP759717_SLE_PortLoko_2014-10-07          | 14/10/07 | Genbank | Port Loko    | SL3.2.2 |
| EBOV_J0061_KP759637_SLE_PortLoko_2014-10-10          | 14/10/10 | Genbank | Port Loko    | SL3.2.2 |
| EBOV_J0073_KP759738_SLE_PortLoko_2014-10-12          | 14/10/12 | Genbank | Port Loko    | SL3.2.2 |
| EBOV_20143036_KR653285_SLE_PortLoko_2014-10-24       | 14/10/24 | Genbank | Port Loko    | SL3.2.2 |
| EBOV_J0114_KP759596_SLE_PortLoko_2014-10-29          | 14/10/29 | Genbank | Port Loko    | SL3.2.2 |
| EBOV_J0115_KP759597_SLE_PortLoko_2014-10-29          | 14/10/29 | Genbank | Port Loko    | SL3.2.2 |
| EBOV_J0140_KP759603_SLE_WesternRural_2014-10-30      | 14/10/30 | Genbank | WAR          | SL3.2.2 |
| EBOV_J0142_KP759690_SLE_WesternUrban_2014-11-03      | 14/11/03 | Genbank | WAU          | SL3.2.2 |
| EBOV_J0163_KP759702_SLE_PortLoko_2014-11-08          | 14/11/08 | Genbank | Port Loko    | SL3.2.2 |
| NICD2974-swab_SLE_PL_2014-11-08                      | 14/11/08 | NICD    | Port Loko    | SL3.2.2 |
| EBOV_J0164_KP759623_SLE_WesternRural_2014-11-09      | 14/11/09 | Genbank | WAR          | SL3.2.2 |
| NICD3097_SLE_PL_2014-11-12                           | 14/11/12 | NICD    | Port Loko    | SL3.2.2 |
| EBOV_Makona-GE1_KP728283_SLE_WesternArea_2014-11-21  | 14/11/21 | Genbank | Western Area | SL3.2.2 |
| EBOV_KT2315_KU296812_SLE_PortLoko_2014-12-02         | 14/12/02 | Genbank | Port Loko    | SL3.2.2 |
| EBOV_KT2316_KU296774_SLE_PortLoko_2014-12-02         | 14/12/02 | Genbank | Port Loko    | SL3.2.2 |
| NICD4795-swab_SLE_WUR_2014-12-14                     | 14/12/14 | NICD    | WAU          | SL3.2.2 |
| NICD5367-swab_SLE_WUR_2014-12-27                     | 14/12/27 | NICD    | WAU          | SL3.2.2 |
| EBOV_77581_EMLK_KU296540_SLE_WesternUrban_2015-01-03 | 15/01/03 | Genbank | WAU          | SL3.2.2 |
| EBOV_77582_EMLK_KU296816_SLE_WesternUrban_2015-01-03 | 15/01/03 | Genbank | WAU          | SL3.2.2 |
| EBOV_77594_EMLK_KU296343_SLE_WesternUrban_2015-01-04 | 15/01/04 | Genbank | WAU          | SL3.2.2 |
| EBOV_77724_EMLK_KU296656_SLE_UNKNOWN_2015-01-10      | 15/01/10 | Genbank | UNKNOWN      | SL3.2.2 |
| EBOV_77706_EMLK_KU296572_SLE_WesternUrban_2015-01-10 | 15/01/10 | Genbank | WAU          | SL3.2.2 |
| EBOV_75688_EMLH_KU296672_SLE_WesternRural_2015-01-14 | 15/01/14 | Genbank | WAR          | SL3.2.2 |
| EBOV_75750_EMLH_KU296464_SLE_WesternUrban_2015-01-17 | 15/01/17 | Genbank | WAU          | SL3.2.2 |
| NICD6079_SLE_WUR_2015-01-17                          | 15/01/17 | NICD    | WAU          | SL3.2.2 |
| EBOV_375_EMLH_KU296813_SLE_UNKNOWN_2015-01-21        | 15/01/21 | Genbank | UNKNOWN      | SL3.2.2 |
| EBOV_362_EMLH_KU296505_SLE_WesternUrban_2015-01-21   | 15/01/21 | Genbank | WAU          | SL3.2.2 |
| EBOV_KT5243_KU296736_SLE_UNKNOWN_2015-02-22          | 15/02/22 | Genbank | UNKNOWN      | SL3.2.2 |



|                                                    |          |         |           |         |
|----------------------------------------------------|----------|---------|-----------|---------|
| EBOV_PL4028_KU296552_SLE_PortLoko_2015-02-26       | 15/02/26 | Genbank | Port Loko | SL3.2.2 |
| EBOV_PL4121_KU296305_SLE_PortLoko_2015-02-28       | 15/02/28 | Genbank | Port Loko | SL3.2.2 |
| EBOV_PL4123_KU296752_SLE_PortLoko_2015-02-28       | 15/02/28 | Genbank | Port Loko | SL3.2.2 |
| EBOV_PL4125_KU296471_SLE_PortLoko_2015-02-28       | 15/02/28 | Genbank | Port Loko | SL3.2.2 |
| EBOV_PL4126_KU296478_SLE_PortLoko_2015-02-28       | 15/02/28 | Genbank | Port Loko | SL3.2.2 |
| EBOV_PL4127_KU296529_SLE_PortLoko_2015-02-28       | 15/02/28 | Genbank | Port Loko | SL3.2.2 |
| EBOV_PL4169_KU296828_SLE_PortLoko_2015-03-01       | 15/03/01 | Genbank | Port Loko | SL3.2.2 |
| EBOV_PL4256_KU296509_SLE_PortLoko_2015-03-03       | 15/03/03 | Genbank | Port Loko | SL3.2.2 |
| EBOV_PL4322_KU296677_SLE_PortLoko_2015-03-05       | 15/03/05 | Genbank | Port Loko | SL3.2.2 |
| EBOV_PL4330_KU296624_SLE_PortLoko_2015-03-05       | 15/03/05 | Genbank | Port Loko | SL3.2.2 |
| EBOV_PL4561_KU296725_SLE_PortLoko_2015-03-10       | 15/03/10 | Genbank | Port Loko | SL3.2.2 |
| EBOV_PL4784_KU296660_SLE_PortLoko_2015-03-14       | 15/03/14 | Genbank | Port Loko | SL3.2.2 |
| EBOV_PL5201_KU296612_SLE_PortLoko_2015-03-23       | 15/03/23 | Genbank | Port Loko | SL3.2.2 |
| EBOV_G4725_KR105267_SLE_Moyamba_2014-08-04         | 14/08/04 | Genbank | Moyamba   | SL3.2.3 |
| EBOV_G4955_KR105281_SLE_UNKNOWN_2014-08-13         | 14/08/13 | Genbank | UNKNOWN   | SL3.2.3 |
| EBOV_G4999_KR105291_SLE_Kenema_2014-08-15          | 14/08/15 | Genbank | Kenema    | SL3.2.3 |
| EBOV_G4994_KR105289_SLE_UNKNOWN_2014-08-15         | 14/08/15 | Genbank | UNKNOWN   | SL3.2.3 |
| EBOV_G5064_KR105297_SLE_Moyamba_2014-08-17         | 14/08/17 | Genbank | Moyamba   | SL3.2.3 |
| EBOV_20140091_KR653239_SLE_WesternRural_2014-08-22 | 14/08/22 | Genbank | WAR       | SL3.2.3 |
| NICD0013_SLE_WR_2014-08-26                         | 14/08/26 | NICD    | WAR       | SL3.2.3 |
| NICD0032_SLE_MOY_2014-08-27                        | 14/08/27 | NICD    | Moyamba   | SL3.2.3 |
| NICD0110_SLE_PL_2014-08-30                         | 14/08/30 | NICD    | Port Loko | SL3.2.3 |
| EBOV_20140436_KR653287_SLE_Moyamba_2014-09-03      | 14/09/03 | Genbank | Moyamba   | SL3.2.3 |
| EBOV_G5516_KR105307_SLE_Moyamba_2014-09-04         | 14/09/04 | Genbank | Moyamba   | SL3.2.3 |
| EBOV_G5520_KR105308_SLE_Kenema_2014-09-05          | 14/09/05 | Genbank | Kenema    | SL3.2.3 |
| NICD0298_SLE_PL_2014-09-05                         | 14/09/05 | NICD    | Port Loko | SL3.2.3 |
| EBOV_G5617_KR105312_SLE_Kenema_2014-09-10          | 14/09/10 | Genbank | Kenema    | SL3.2.3 |
| EBOV_G5691_KR105318_SLE_Kenema_2014-09-14          | 14/09/14 | Genbank | Kenema    | SL3.2.3 |
| EBOV_G5738_KR105322_SLE_Moyamba_2014-09-15         | 14/09/15 | Genbank | Moyamba   | SL3.2.3 |
| NICD0856-Vero_SLE_WR_2014-09-20                    | 14/09/20 | NICD    | WAR       | SL3.2.3 |
| EBOV_G5853_KR105329_SLE_Moyamba_2014-09-21         | 14/09/21 | Genbank | Moyamba   | SL3.2.3 |
| NICD1051_SLE_PL_2014-09-21                         | 14/09/21 | NICD    | Port Loko | SL3.2.3 |
| NICD1043_SLE_PL_2014-09-22                         | 14/09/22 | NICD    | Port Loko | SL3.2.3 |
| EBOV_20141282_KR653229_SLE_Kambia_2014-09-23       | 14/09/23 | Genbank | Kambia    | SL3.2.3 |

|                                                 |          |         |              |         |
|-------------------------------------------------|----------|---------|--------------|---------|
| EBOV_G5985_KR105334_SLE_UNKNOWN_2014-09-25      | 14/09/25 | Genbank | UNKNOWN      | SL3.2.3 |
| EBOV_J0003_KP759651_SLE_PortLoko_2014-09-28     | 14/09/28 | Genbank | Port Loko    | SL3.2.3 |
| EBOV_J0032_KP759691_SLE_PortLoko_2014-09-30     | 14/09/30 | Genbank | Port Loko    | SL3.2.3 |
| EBOV_J0038_KP759618_SLE_PortLoko_2014-09-30     | 14/09/30 | Genbank | Port Loko    | SL3.2.3 |
| EBOV_20141491_KR653289_SLE_Kambia_2014-10-01    | 14/10/01 | Genbank | Kambia       | SL3.2.3 |
| EBOV_J0048_KP759716_SLE_WesternRural_2014-10-05 | 14/10/05 | Genbank | WAR          | SL3.2.3 |
| EBOV_J0074_KP759739_SLE_WesternRural_2014-10-13 | 14/10/13 | Genbank | WAR          | SL3.2.3 |
| EBOV_J0079_KP759748_SLE_WesternRural_2014-10-16 | 14/10/16 | Genbank | WAR          | SL3.2.3 |
| EBOV_J0085_KP759645_SLE_PortLoko_2014-10-17     | 14/10/17 | Genbank | Port Loko    | SL3.2.3 |
| EBOV_J0088_KP759648_SLE_PortLoko_2014-10-20     | 14/10/20 | Genbank | Port Loko    | SL3.2.3 |
| NICD2521-swab_SLE_WUR_2014-10-23                | 14/10/23 | NICD    | WAU          | SL3.2.3 |
| EBOV_J0102_KP759657_SLE_PortLoko_2014-10-27     | 14/10/27 | Genbank | Port Loko    | SL3.2.3 |
| EBOV_J0101_KP759656_SLE_PortLoko_2014-10-29     | 14/10/29 | Genbank | Port Loko    | SL3.2.3 |
| EBOV_J0103_KP759658_SLE_PortLoko_2014-10-29     | 14/10/29 | Genbank | Port Loko    | SL3.2.3 |
| EBOV_J0104_KP759765_SLE_PortLoko_2014-10-29     | 14/10/29 | Genbank | Port Loko    | SL3.2.3 |
| EBOV_J0105_KP759766_SLE_PortLoko_2014-10-29     | 14/10/29 | Genbank | Port Loko    | SL3.2.3 |
| EBOV_J0118_KP759598_SLE_WesternRural_2014-10-31 | 14/10/31 | Genbank | WAR          | SL3.2.3 |
| EBOV_J0141_KP759689_SLE_WesternRural_2014-11-04 | 14/11/04 | Genbank | WAR          | SL3.2.3 |
| EBOV_J0165_KP759703_SLE_WesternUrban_2014-11-08 | 14/11/08 | Genbank | WAU          | SL3.2.3 |
| NICD2965-Vero_SLE_PL_2014-11-10                 | 14/11/10 | NICD    | Port Loko    | SL3.2.3 |
| EBOV_J0168_KP759705_SLE_WesternArea_2014-11-11  | 14/11/11 | Genbank | Western Area | SL3.2.3 |
| EBOV_20144865_KR653231_SLE_PortLoko_2014-11-13  | 14/11/13 | Genbank | Port Loko    | SL3.2.3 |
| NICD3670_SLE_WR_2014-11-22                      | 14/11/22 | NICD    | WAR          | SL3.2.3 |
| EBOV_G4861_KR105274_SLE_UNKNOWN_2014-08-10      | 14/08/10 | Genbank | UNKNOWN      | SL3.2.4 |
| EBOV_G5114_KR105299_SLE_Pujehun_2014-08-18      | 14/08/18 | Genbank | Pujehun      | SL3.2.4 |
| EBOV_G5112_KR105298_SLE_Kenema_2014-08-19       | 14/08/19 | Genbank | Kenema       | SL3.2.4 |
| EBOV_G5119_KR105300_SLE_Kenema_2014-08-24       | 14/08/24 | Genbank | Kenema       | SL3.2.4 |
| NICD0019_SLE_WR_2014-08-26                      | 14/08/26 | NICD    | WAR          | SL3.2.4 |
| EBOV_20140395_KR653279_SLE_Kono_2014-09-02      | 14/09/02 | Genbank | Kono         | SL3.2.4 |
| EBOV_G5529_KR105309_SLE_Kono_2014-09-05         | 14/09/05 | Genbank | Kono         | SL3.2.4 |
| EBOV_G5684_KR105316_SLE_Kenema_2014-09-13       | 14/09/13 | Genbank | Kenema       | SL3.2.4 |
| EBOV_G5685_KR105317_SLE_Kenema_2014-09-13       | 14/09/13 | Genbank | Kenema       | SL3.2.4 |
| EBOV_G5743_KR105323_SLE_Kono_2014-09-17         | 14/09/17 | Genbank | Kono         | SL3.2.4 |

|                                                 |          |         |              |         |
|-------------------------------------------------|----------|---------|--------------|---------|
| EBOV_20141123_KR653291_SLE_Bo_2014-09-22        | 14/09/22 | Genbank | Bo           | SL3.2.4 |
| EBOV_G5898_KR105331_SLE_Bo_2014-09-22           | 14/09/22 | Genbank | Bo           | SL3.2.4 |
| EBOV_20141280_KR653276_SLE_Kambia_2014-09-23    | 14/09/23 | Genbank | Kambia       | SL3.2.4 |
| EBOV_J0004_KP759668_SLE_WesternRural_2014-09-28 | 14/09/28 | Genbank | WAR          | SL3.2.4 |
| EBOV_J0006_KP759630_SLE_WesternRural_2014-09-28 | 14/09/28 | Genbank | WAR          | SL3.2.4 |
| NICD1526_SLE_WR_2014-10-01                      | 14/10/01 | NICD    | WAR          | SL3.2.4 |
| EBOV_J0026_KP759670_SLE_Bombali_2014-10-02      | 14/10/02 | Genbank | Bombali      | SL3.2.4 |
| EBOV_20141582_KR653230_SLE_Bo_2014-10-04        | 14/10/04 | Genbank | Bo           | SL3.2.4 |
| EBOV_J0040_KP759629_SLE_WesternArea_2014-10-04  | 14/10/04 | Genbank | Western Area | SL3.2.4 |
| EBOV_J0043_KP759712_SLE_WesternArea_2014-10-04  | 14/10/04 | Genbank | Western Area | SL3.2.4 |
| EBOV_20141650_KR653225_SLE_Kenema_2014-10-05    | 14/10/05 | Genbank | Kenema       | SL3.2.4 |
| EBOV_J0044_KP759713_SLE_WesternRural_2014-10-05 | 14/10/05 | Genbank | WAR          | SL3.2.4 |
| EBOV_J0045_KP759714_SLE_WesternUrban_2014-10-05 | 14/10/05 | Genbank | WAU          | SL3.2.4 |
| EBOV_J0047_KP759632_SLE_WesternUrban_2014-10-05 | 14/10/05 | Genbank | WAU          | SL3.2.4 |
| EBOV_J0060_KP759726_SLE_WesternUrban_2014-10-06 | 14/10/06 | Genbank | WAU          | SL3.2.4 |
| EBOV_J0059_KP759725_SLE_WesternRural_2014-10-08 | 14/10/08 | Genbank | WAR          | SL3.2.4 |
| EBOV_J0052_KP759720_SLE_WesternUrban_2014-10-08 | 14/10/08 | Genbank | WAU          | SL3.2.4 |
| EBOV_J0065_KP759729_SLE_WesternRural_2014-10-09 | 14/10/09 | Genbank | WAR          | SL3.2.4 |
| EBOV_J0068_KP759732_SLE_WesternRural_2014-10-09 | 14/10/09 | Genbank | WAR          | SL3.2.4 |
| EBOV_J0069_KP759733_SLE_WesternRural_2014-10-09 | 14/10/09 | Genbank | WAR          | SL3.2.4 |
| EBOV_J0064_KP759728_SLE_WesternUrban_2014-10-09 | 14/10/09 | Genbank | WAU          | SL3.2.4 |
| NICD1972-Vero_SLE_WUR_2014-10-09                | 14/10/09 | NICD    | WAU          | SL3.2.4 |
| NICD2118_SLE_WUR_2014-10-11                     | 14/10/11 | NICD    | WAU          | SL3.2.4 |
| EBOV_J0081_KP759750_SLE_WesternRural_2014-10-16 | 14/10/16 | Genbank | WAR          | SL3.2.4 |
| EBOV_J0075_KP759743_SLE_WesternRural_2014-10-17 | 14/10/17 | Genbank | WAR          | SL3.2.4 |
| EBOV_J0077_KP759745_SLE_WesternRural_2014-10-17 | 14/10/17 | Genbank | WAR          | SL3.2.4 |
| EBOV_J0080_KP759749_SLE_PortLoko_2014-10-18     | 14/10/18 | Genbank | Port Loko    | SL3.2.4 |
| EBOV_J0078_KP759746_SLE_WesternUrban_2014-10-18 | 14/10/18 | Genbank | WAU          | SL3.2.4 |
| NICD2540-Vero_SLE_WUR_2014-10-22                | 14/10/22 | NICD    | WAU          | SL3.2.4 |
| NICD2542_SLE_WUR_2014-10-22                     | 14/10/22 | NICD    | WAU          | SL3.2.4 |
| EBOV_J0087_KP759647_SLE_PortLoko_2014-10-23     | 14/10/23 | Genbank | Port Loko    | SL3.2.4 |
| EBOV_J0086_KP759646_SLE_WesternRural_2014-10-23 | 14/10/23 | Genbank | WAR          | SL3.2.4 |

|                                                    |          |         |              |         |
|----------------------------------------------------|----------|---------|--------------|---------|
| EBOV_J0090_KP759649_SLE_WesternUrban_2014-10-23    | 14/10/23 | Genbank | WAU          | SL3.2.4 |
| EBOV_J0093_KP759760_SLE_WesternRural_2014-10-24    | 14/10/24 | Genbank | WAR          | SL3.2.4 |
| EBOV_J0091_KP759759_SLE_WesternArea_2014-10-25     | 14/10/25 | Genbank | Western Area | SL3.2.4 |
| EBOV_20143031_KR653275_SLE_WesternUrban_2014-10-25 | 14/10/25 | Genbank | WAU          | SL3.2.4 |
| EBOV_J0100_KP759655_SLE_Kambia_2014-10-26          | 14/10/26 | Genbank | Kambia       | SL3.2.4 |
| EBOV_J0094_KP759761_SLE_WesternRural_2014-10-27    | 14/10/27 | Genbank | WAR          | SL3.2.4 |
| EBOV_20143187_KR653298_SLE_Pujehun_2014-10-28      | 14/10/28 | Genbank | Pujehun      | SL3.2.4 |
| EBOV_J0098_KP759763_SLE_WesternRural_2014-10-28    | 14/10/28 | Genbank | WAR          | SL3.2.4 |
| EBOV_J0106_KP759767_SLE_WesternRural_2014-10-28    | 14/10/28 | Genbank | WAR          | SL3.2.4 |
| EBOV_J0108_KP759659_SLE_WesternRural_2014-10-28    | 14/10/28 | Genbank | WAR          | SL3.2.4 |
| EBOV_J0107_KP759768_SLE_WesternUrban_2014-10-29    | 14/10/29 | Genbank | WAU          | SL3.2.4 |
| EBOV_J0116_KP759664_SLE_WesternRural_2014-10-30    | 14/10/30 | Genbank | WAR          | SL3.2.4 |
| EBOV_J0117_KP759665_SLE_WesternRural_2014-10-31    | 14/10/31 | Genbank | WAR          | SL3.2.4 |
| EBOV_J0133_KP759681_SLE_WesternRural_2014-10-31    | 14/10/31 | Genbank | WAR          | SL3.2.4 |
| EBOV_J0136_KP759684_SLE_WesternRural_2014-11-01    | 14/11/01 | Genbank | WAR          | SL3.2.4 |
| EBOV_J0124_KP759673_SLE_WesternArea_2014-11-02     | 14/11/02 | Genbank | Western Area | SL3.2.4 |
| EBOV_J0129_KP759600_SLE_WesternUrban_2014-11-02    | 14/11/02 | Genbank | WAU          | SL3.2.4 |
| EBOV_J0132_KP759601_SLE_WesternUrban_2014-11-02    | 14/11/02 | Genbank | WAU          | SL3.2.4 |
| EBOV_20143716_KR653292_SLE_Moyamba_2014-11-04      | 14/11/04 | Genbank | Moyamba      | SL3.2.4 |
| EBOV_20143796_KR653257_SLE_Moyamba_2014-11-05      | 14/11/05 | Genbank | Moyamba      | SL3.2.4 |
| EBOV_20143753_KR653236_SLE_Tonkolili_2014-11-05    | 14/11/05 | Genbank | Tonkolili    | SL3.2.4 |
| NICD3824_SLE_WR_2014-11-25                         | 14/11/05 | NICD    | WAR          | SL3.2.4 |
| NICD2749_SLE_KMB_2014-11-06                        | 14/11/06 | NICD    | Kambia       | SL3.2.4 |
| EBOV_J0148_KP759612_SLE_WesternRural_2014-11-06    | 14/11/06 | Genbank | WAR          | SL3.2.4 |
| EBOV_J0151_KP759613_SLE_WesternRural_2014-11-07    | 14/11/07 | Genbank | WAR          | SL3.2.4 |
| EBOV_J0153_KP759616_SLE_WesternRural_2014-11-07    | 14/11/07 | Genbank | WAR          | SL3.2.4 |
| EBOV_J0167_KP759624_SLE_WesternUrban_2014-11-08    | 14/11/08 | Genbank | WAU          | SL3.2.4 |
| EBOV_J0169_KP759706_SLE_WesternUrban_2014-11-09    | 14/11/09 | Genbank | WAU          | SL3.2.4 |
| EBOV_J0170_KP759625_SLE_WesternUrban_2014-11-10    | 14/11/10 | Genbank | WAU          | SL3.2.4 |
| EBOV_J0172_KP759626_SLE_WesternRural_2014-11-11    | 14/11/11 | Genbank | WAR          | SL3.2.4 |
| EBOV_20144610_KR653270_SLE_Tonkolili_2014-11-12    | 14/11/12 | Genbank | Tonkolili    | SL3.2.4 |
| NICD3465-swab_SLE_WUR_2014-11-18                   | 14/11/18 | NICD    | WAU          | SL3.2.4 |

|                                                     |          |         |              |         |
|-----------------------------------------------------|----------|---------|--------------|---------|
| NICD3666_SLE_WR_2014-11-22                          | 14/11/22 | NICD    | WAR          | SL3.2.4 |
| NICD3687-Vero_SLE_WUR_2014-11-23                    | 14/11/23 | NICD    | WAU          | SL3.2.4 |
| NICD3752_SLE_WR_2014-11-24                          | 14/11/24 | NICD    | WAR          | SL3.2.4 |
| NICD3753_SLE_WR_2014-11-24                          | 14/11/24 | NICD    | WAR          | SL3.2.4 |
| EBOV_20145853_KR653290_SLE_Pujehun_2014-11-26       | 14/11/26 | Genbank | Pujehun      | SL3.2.4 |
| NICD3944_SLE_WUR_2014-11-26                         | 14/11/26 | NICD    | WAU          | SL3.2.4 |
| NICD3954_SLE_WUR_2014-11-26                         | 14/11/26 | NICD    | WAU          | SL3.2.4 |
| NICD4024-Vero_SLE_WUR_2014-11-29                    | 14/11/29 | NICD    | WAU          | SL3.2.4 |
| NICD4027-Vero_SLE_WUR_2014-11-29                    | 14/11/29 | NICD    | WAU          | SL3.2.4 |
| NICD4029-Vero_SLE_WUR_2014-11-29                    | 14/11/29 | NICD    | WAU          | SL3.2.4 |
| NICD4041-Vero_SLE_WUR_2014-11-29                    | 14/11/29 | NICD    | WAU          | SL3.2.4 |
| EBOV_KT2317_KU296735_SLE_PortLoko_2014-12-02        | 14/12/02 | Genbank | Port Loko    | SL3.2.4 |
| EBOV_KT2321_KU296762_SLE_PortLoko_2014-12-02        | 14/12/02 | Genbank | Port Loko    | SL3.2.4 |
| NICD4122_SLE_WR_2014-12-02                          | 14/12/02 | NICD    | WAR          | SL3.2.4 |
| NICD4125_SLE_WR_2014-12-02                          | 14/12/02 | NICD    | WAR          | SL3.2.4 |
| NICD4167_SLE_WUR_2014-12-02                         | 14/12/02 | NICD    | WAU          | SL3.2.4 |
| NICD4325_SLE_WR_2014-12-05                          | 14/12/05 | NICD    | WAR          | SL3.2.4 |
| NICD4361-Vero_SLE_WR_2014-12-06                     | 14/12/06 | NICD    | WAR          | SL3.2.4 |
| NICD4430_SLE_WUR_2014-12-06                         | 14/12/06 | NICD    | WAU          | SL3.2.4 |
| NICD4693_SLE_WUR_2014-12-10                         | 14/12/10 | NICD    | WAU          | SL3.2.4 |
| NICD4674_SLE_WR_2014-12-12                          | 14/12/12 | NICD    | WAR          | SL3.2.4 |
| NICD4735_SLE_WUR_2014-12-13                         | 14/12/13 | NICD    | WAU          | SL3.2.4 |
| NICD4823_SLE_WUR_2014-12-15                         | 14/12/15 | NICD    | WAU          | SL3.2.4 |
| NICD4877_SLE_WUR_2014-12-16                         | 14/12/16 | NICD    | WAU          | SL3.2.4 |
| NICD4932-Vero_SLE_WUR_2014-12-17                    | 14/12/17 | NICD    | WAU          | SL3.2.4 |
| NICD4975_SLE_WUR_2014-12-18                         | 14/12/18 | NICD    | WAU          | SL3.2.4 |
| NICD5071_SLE_WUR_2014-12-20                         | 14/12/20 | NICD    | WAU          | SL3.2.4 |
| NICD5400_SLE_WUR_2014-12-28                         | 14/12/28 | NICD    | WAU          | SL3.2.4 |
| EBOV_Makona-UK2_KP658432_SLE_WesternArea_2014-12-29 | 14/12/29 | Genbank | Western Area | SL3.2.4 |
| NICD5386_SLE_WUR_2014-12-29                         | 14/12/29 | NICD    | WAU          | SL3.2.4 |
| NICD5388_SLE_WUR_2014-12-29                         | 14/12/29 | NICD    | WAU          | SL3.2.4 |
| NICD5395_SLE_WUR_2014-12-29                         | 14/12/29 | NICD    | WAU          | SL3.2.4 |
| EBOV_77525_EMLK_KU296820_SLE_2014-12-30             | 14/12/30 | Genbank | UNKNOWN      | SL3.2.4 |

|                                                      |          |         |         |         |
|------------------------------------------------------|----------|---------|---------|---------|
| EBOV_77526_EMLK_KU296824_SLE_2014-12-30              | 14/12/30 | Genbank | UNKNOWN | SL3.2.4 |
| EBOV_77549_EMLK_KU296293_SLE_2015-01-01              | 15/01/01 | Genbank | UNKNOWN | SL3.2.4 |
| EBOV_77558_EMLK_KU296733_SLE_2015-01-02              | 15/01/02 | Genbank | UNKNOWN | SL3.2.4 |
| EBOV_77563_EMLK_KU296432_SLE_2015-01-02              | 15/01/02 | Genbank | UNKNOWN | SL3.2.4 |
| EBOV_77574_EMLK_KU296700_SLE_2015-01-03              | 15/01/03 | Genbank | UNKNOWN | SL3.2.4 |
| EBOV_77573_EMLK_KU296516_SLE_WesternUrban_2015-01-03 | 15/01/03 | Genbank | WAU     | SL3.2.4 |
| EBOV_77580_EMLK_KU296431_SLE_WesternUrban_2015-01-03 | 15/01/03 | Genbank | WAU     | SL3.2.4 |
| NICD5647-Vero_SLE_WUR_2015-01-03                     | 15/01/03 | NICD    | WAU     | SL3.2.4 |
| EBOV_77589_EMLK_KU296403_SLE_WesternUrban_2015-01-04 | 15/01/04 | Genbank | WAU     | SL3.2.4 |
| EBOV_77612_EMLK_KU296636_SLE_WesternUrban_2015-01-05 | 15/01/05 | Genbank | WAU     | SL3.2.4 |
| EBOV_77613_EMLK_KU296579_SLE_WesternUrban_2015-01-05 | 15/01/05 | Genbank | WAU     | SL3.2.4 |
| EBOV_77615_EMLK_KU296706_SLE_WesternUrban_2015-01-05 | 15/01/05 | Genbank | WAU     | SL3.2.4 |
| EBOV_77630_EMLK_KU296779_SLE_WesternUrban_2015-01-06 | 15/01/06 | Genbank | WAU     | SL3.2.4 |
| EBOV_77632_EMLK_KU296710_SLE_WesternUrban_2015-01-06 | 15/01/06 | Genbank | WAU     | SL3.2.4 |
| EBOV_77643_EMLK_KU296395_SLE_WesternUrban_2015-01-07 | 15/01/07 | Genbank | WAU     | SL3.2.4 |
| EBOV_77644_EMLK_KU296312_SLE_WesternUrban_2015-01-07 | 15/01/07 | Genbank | WAU     | SL3.2.4 |
| EBOV_77648_EMLK_KU296620_SLE_WesternUrban_2015-01-07 | 15/01/07 | Genbank | WAU     | SL3.2.4 |
| EBOV_77649_EMLK_KU296380_SLE_WesternUrban_2015-01-07 | 15/01/07 | Genbank | WAU     | SL3.2.4 |
| EBOV_77667_EMLK_KU296361_SLE_2015-01-08              | 15/01/08 | Genbank | UNKNOWN | SL3.2.4 |
| EBOV_77669_EMLK_KU296367_SLE_2015-01-08              | 15/01/08 | Genbank | UNKNOWN | SL3.2.4 |
| EBOV_77670_EMLK_KU296329_SLE_2015-01-08              | 15/01/08 | Genbank | UNKNOWN | SL3.2.4 |
| EBOV_77673_EMLK_KU296458_SLE_2015-01-08              | 15/01/08 | Genbank | UNKNOWN | SL3.2.4 |
| EBOV_77675_EMLK_KU296807_SLE_2015-01-08              | 15/01/08 | Genbank | UNKNOWN | SL3.2.4 |
| EBOV_77676_EMLK_KU296309_SLE_2015-01-08              | 15/01/08 | Genbank | UNKNOWN | SL3.2.4 |
| EBOV_77677_EMLK_KU296558_SLE_2015-01-08              | 15/01/08 | Genbank | UNKNOWN | SL3.2.4 |
| EBOV_77679_EMLK_KU296512_SLE_2015-01-08              | 15/01/08 | Genbank | UNKNOWN | SL3.2.4 |
| EBOV_77681_EMLK_KU296435_SLE_UNKNOWN_2015-01-08      | 15/01/08 | Genbank | UNKNOWN | SL3.2.4 |
| NICD5747_SLE_WUR_2015-01-08                          | 15/01/08 | NICD    | WAU     | SL3.2.4 |
| NICD5819_SLE_WUR_2015-01-09                          | 15/01/09 | NICD    | WAU     | SL3.2.4 |
| EBOV_77710_EMLK_KU296696_SLE_WesternUrban_2015-01-10 | 15/01/10 | Genbank | WAU     | SL3.2.4 |
| EBOV_77711_EMLK_KU296644_SLE_WesternUrban_2015-01-10 | 15/01/10 | Genbank | WAU     | SL3.2.4 |
| EBOV_77712_EMLK_KU296400_SLE_WesternUrban_2015-01-10 | 15/01/10 | Genbank | WAU     | SL3.2.4 |
| EBOV_77716_EMLK_KU296569_SLE_WesternUrban_2015-01-10 | 15/01/10 | Genbank | WAU     | SL3.2.4 |
| EBOV_75685_EMLH_KU296365_SLE_UNKNOWN_2015-01-14      | 15/01/14 | Genbank | UNKNOWN | SL3.2.4 |

|                                                      |          |         |           |         |
|------------------------------------------------------|----------|---------|-----------|---------|
| EBOV_75708_EMLH_KU296739_SLE_2015-01-15              | 15/01/15 | Genbank | UNKNOWN   | SL3.2.4 |
| EBOV_75722_EMLH_KU296791_SLE_WesternRural_2015-01-15 | 15/01/15 | Genbank | WAR       | SL3.2.4 |
| EBOV_PL2101_KU296714_SLE_PortLoko_2015-01-18         | 15/01/18 | Genbank | Port Loko | SL3.2.4 |
| EBOV_75779_EMLH_KU296407_SLE_WesternUrban_2015-01-19 | 15/01/19 | Genbank | WAU       | SL3.2.4 |
| EBOV_356_EMLH_KU296546_SLE_UNKNOWN_2015-01-21        | 15/01/21 | Genbank | UNKNOWN   | SL3.2.4 |
| EBOV_380_EMLH_KU296377_SLE_UNKNOWN_2015-01-22        | 15/01/22 | Genbank | UNKNOWN   | SL3.2.4 |
| EBOV_389_EMLH_KU296593_SLE_WesternRural_2015-01-23   | 15/01/23 | Genbank | WAR       | SL3.2.4 |
| EBOV_402_EMLH_KU296495_SLE_WesternRural_2015-01-23   | 15/01/23 | Genbank | WAR       | SL3.2.4 |
| NICD6195_SLE_WUR_2015-01-23                          | 15/01/23 | NICD    | WAU       | SL3.2.4 |
| EBOV_405_EMLH_KU296805_SLE_UNKNOWN_2015-01-24        | 15/01/24 | Genbank | UNKNOWN   | SL3.2.4 |
| EBOV_408_EMLH_KU296408_SLE_UNKNOWN_2015-01-24        | 15/01/24 | Genbank | UNKNOWN   | SL3.2.4 |
| EBOV_413_EMLH_KU296472_SLE_UNKNOWN_2015-01-24        | 15/01/24 | Genbank | UNKNOWN   | SL3.2.4 |
| EBOV_442_EMLH_KU296375_SLE_2015-01-26                | 15/01/26 | Genbank | UNKNOWN   | SL3.2.4 |
| EBOV_443_EMLH_KU296539_SLE_WesternUrban_2015-01-26   | 15/01/26 | Genbank | WAU       | SL3.2.4 |
| EBOV_448_EMLH_KU296797_SLE_2015-01-27                | 15/01/27 | Genbank | UNKNOWN   | SL3.2.4 |
| NICD6345_SLE_WUR_2015-01-27                          | 15/01/27 | NICD    | WAU       | SL3.2.4 |
| NICD6348_SLE_WUR_2015-01-28                          | 15/01/28 | NICD    | WAU       | SL3.2.4 |
| EBOV_PL2668_KU296294_SLE_PortLoko_2015-01-29         | 15/01/29 | Genbank | Port Loko | SL3.2.4 |
| EBOV_468_EMLH_KU296773_SLE_UNKNOWN_2015-01-29        | 15/01/29 | Genbank | UNKNOWN   | SL3.2.4 |
| EBOV_470_EMLH_KU296662_SLE_UNKNOWN_2015-01-29        | 15/01/29 | Genbank | UNKNOWN   | SL3.2.4 |
| EBOV_480_EMLH_KU296491_SLE_UNKNOWN_2015-01-29        | 15/01/29 | Genbank | UNKNOWN   | SL3.2.4 |
| NICD6403_SLE_WUR_2015-01-29                          | 15/01/29 | NICD    | WAU       | SL3.2.4 |
| NICD6404_SLE_WUR_2015-01-29                          | 15/01/29 | NICD    | WAU       | SL3.2.4 |
| EBOV_489_EMLH_KU296324_SLE_WesternRural_2015-01-30   | 15/01/30 | Genbank | WAR       | SL3.2.4 |
| NICD6392-Vero_SLE_WUR_2015-01-30                     | 15/01/30 | NICD    | WAU       | SL3.2.4 |
| NICD6414_SLE_WUR_2014-01-30                          | 15/01/30 | NICD    | WAU       | SL3.2.4 |
| EBOV_KT4609_KU296622_SLE_2015-01-31                  | 15/01/31 | Genbank | UNKNOWN   | SL3.2.4 |
| EBOV_KT4622_KU296587_SLE_UNKNOWN_2015-02-01          | 15/02/01 | Genbank | UNKNOWN   | SL3.2.4 |
| EBOV_511_EMLH_KU296646_SLE_WesternUrban_2015-02-01   | 15/02/01 | Genbank | WAU       | SL3.2.4 |
| EBOV_518_EMLH_KU296747_SLE_UNKNOWN_2015-02-02        | 15/02/02 | Genbank | UNKNOWN   | SL3.2.4 |
| EBOV_KT4631_KU296607_SLE_WesternUrban_2015-02-02     | 15/02/02 | Genbank | WAU       | SL3.2.4 |
| EBOV_554_EMLH_KU296817_SLE_UNKNOWN_2015-02-03        | 15/02/03 | Genbank | UNKNOWN   | SL3.2.4 |
| EBOV_KT4677_KU296608_SLE_WesternRural_2015-02-03     | 15/02/03 | Genbank | WAR       | SL3.2.4 |
| EBOV_KT4695_KU296549_SLE_WesternRural_2015-02-04     | 15/02/04 | Genbank | WAR       | SL3.2.4 |

|                                                      |          |         |         |         |
|------------------------------------------------------|----------|---------|---------|---------|
| EBOV_611_EMLH_KU296619_SLE_UNKNOWN_2015-02-05        | 15/02/05 | Genbank | UNKNOWN | SL3.2.4 |
| EBOV_614_EMLH_KU296597_SLE_WesternRural_2015-02-05   | 15/02/05 | Genbank | WAR     | SL3.2.4 |
| EBOV_632_EMLH_KU296693_SLE_WesternUrban_2015-02-06   | 15/02/06 | Genbank | WAU     | SL3.2.4 |
| EBOV_634_EMLH_KU296799_SLE_WesternUrban_2015-02-06   | 15/02/06 | Genbank | WAU     | SL3.2.4 |
| EBOV_651_EMLH_KU296457_SLE_2015-02-07                | 15/02/07 | Genbank | UNKNOWN | SL3.2.4 |
| EBOV_KT4730_KU296416_SLE_UNKNOWN_2015-02-07          | 15/02/07 | Genbank | UNKNOWN | SL3.2.4 |
| NICD6564_SLE_WUR_2015-02-07                          | 15/02/07 | NICD    | WAU     | SL3.2.4 |
| EBOV_705_EMLH_KU296683_SLE_UNKNOWN_2015-02-09        | 15/02/09 | Genbank | UNKNOWN | SL3.2.4 |
| EBOV_KT4828_KU296745_SLE_UNKNOWN_2015-02-10          | 15/02/10 | Genbank | UNKNOWN | SL3.2.4 |
| EBOV_10402_EMLK_KU296635_SLE_WesternUrban_2015-02-10 | 15/02/10 | Genbank | WAU     | SL3.2.4 |
| EBOV_10415_EMLK_KU296741_SLE_WesternUrban_2015-02-10 | 15/02/10 | Genbank | WAU     | SL3.2.4 |
| NICD6587_SLE_WUR_2015-02-10                          | 15/02/10 | NICD    | WAU     | SL3.2.4 |
| EBOV_732_EMLH_KU296391_SLE_UNKNOWN_2015-02-11        | 15/02/11 | Genbank | UNKNOWN | SL3.2.4 |
| EBOV_KT4935_KU296467_SLE_WesternRural_2015-02-11     | 15/02/11 | Genbank | WAR     | SL3.2.4 |
| EBOV_731_EMLH_KU296765_SLE_WesternUrban_2015-02-11   | 15/02/11 | Genbank | WAU     | SL3.2.4 |
| EBOV_741_EMLH_KU296295_SLE_WesternUrban_2015-02-11   | 15/02/11 | Genbank | WAU     | SL3.2.4 |
| NICD6601_SLE_WUR_2015-02-11                          | 15/02/11 | NICD    | WAU     | SL3.2.4 |
| NICD6605_SLE_WUR_2015-02-11                          | 15/02/11 | NICD    | WAU     | SL3.2.4 |
| EBOV_762_EMLH_KU296728_SLE_UNKNOWN_2015-02-12        | 15/02/12 | Genbank | UNKNOWN | SL3.2.4 |
| EBOV_10454_EMLK_KU296679_SLE_WesternUrban_2015-02-12 | 15/02/12 | Genbank | WAU     | SL3.2.4 |
| EBOV_10455_EMLK_KU296388_SLE_WesternUrban_2015-02-12 | 15/02/12 | Genbank | WAU     | SL3.2.4 |
| EBOV_MK2008_KU296526_SLE_WesternUrban_2015-02-12     | 15/02/12 | Genbank | WAU     | SL3.2.4 |
| EBOV_793_EMLH_KU296492_SLE_UNKNOWN_2015-02-13        | 15/02/13 | Genbank | UNKNOWN | SL3.2.4 |
| EBOV_14521_EMLK_KU296755_SLE_WesternUrban_2015-02-13 | 15/02/13 | Genbank | WAU     | SL3.2.4 |
| NICD6640_SLE_WUR_2015-02-13                          | 15/02/13 | NICD    | WAU     | SL3.2.4 |
| NICD6643_SLE_WUR_2015-02-13                          | 15/02/13 | NICD    | WAU     | SL3.2.4 |
| NICD6644_SLE_WUR_2015-02-13                          | 15/02/13 | NICD    | WAU     | SL3.2.4 |
| EBOV_KT5034_KU296632_SLE_2015-02-14                  | 15/02/14 | Genbank | UNKNOWN | SL3.2.4 |
| EBOV_12004_EMLH_KU296302_SLE_WesternRural_2015-02-14 | 15/02/14 | Genbank | WAR     | SL3.2.4 |
| NICD6672_SLE_WUR_2015-02-14                          | 15/02/14 | NICD    | WAU     | SL3.2.4 |
| EBOV_KT5073_KU296553_SLE_UNKNOWN_2015-02-16          | 15/02/16 | Genbank | UNKNOWN | SL3.2.4 |
| EBOV_DML12033_KT357813_SLE_WesternUrban_2015-02-19   | 15/02/19 | Genbank | WAU     | SL3.2.4 |
| EBOV_Goderich1_KT345616_SLE_WesternUrban_2015-02-19  | 15/02/19 | Genbank | WAU     | SL3.2.4 |
| EBOV_KT5214_KU296338_SLE_UNKNOWN_2015-02-20          | 15/02/20 | Genbank | UNKNOWN | SL3.2.4 |



|                                                      |          |         |         |         |
|------------------------------------------------------|----------|---------|---------|---------|
| EBOV_KT5542_KU296557_SLE_UNKNOWN_2015-02-20          | 15/02/20 | Genbank | UNKNOWN | SL3.2.4 |
| EBOV_MK2255_KU296648_SLE_Bombali_2015-02-21          | 15/02/21 | Genbank | Bombali | SL3.2.4 |
| EBOV_12161_EMLH_KU296697_SLE_UNKNOWN_2015-02-21      | 15/02/21 | Genbank | UNKNOWN | SL3.2.4 |
| EBOV_KT5224_KU296383_SLE_UNKNOWN_2015-02-21          | 15/02/21 | Genbank | UNKNOWN | SL3.2.4 |
| EBOV_KT5225_KU296517_SLE_UNKNOWN_2015-02-21          | 15/02/21 | Genbank | UNKNOWN | SL3.2.4 |
| EBOV_KT5233_KU296750_SLE_WesternRural_2015-02-21     | 15/02/21 | Genbank | WAR     | SL3.2.4 |
| EBOV_14687_EMLK_KU296443_SLE_WesternUrban_2015-02-21 | 15/02/21 | Genbank | WAU     | SL3.2.4 |
| EBOV_DML12051_KT357814_SLE_WesternUrban_2015-02-21   | 15/02/21 | Genbank | WAU     | SL3.2.4 |
| EBOV_MK2282_KU296788_SLE_Bombali_2015-02-22          | 15/02/22 | Genbank | Bombali | SL3.2.4 |
| EBOV_MK2283_KU296833_SLE_Bombali_2015-02-22          | 15/02/22 | Genbank | Bombali | SL3.2.4 |
| EBOV_KT5245_KU296411_SLE_UNKNOWN_2015-02-22          | 15/02/22 | Genbank | UNKNOWN | SL3.2.4 |
| EBOV_12178_EMLH_KU296525_SLE_WesternUrban_2015-02-22 | 15/02/22 | Genbank | WAU     | SL3.2.4 |
| EBOV_12179_EMLH_KU296531_SLE_WesternUrban_2015-02-22 | 15/02/22 | Genbank | WAU     | SL3.2.4 |
| EBOV_12180_EMLH_KU296310_SLE_WesternUrban_2015-02-22 | 15/02/22 | Genbank | WAU     | SL3.2.4 |
| EBOV_KT5249_KU296601_SLE_WesternUrban_2015-02-22     | 15/02/22 | Genbank | WAU     | SL3.2.4 |
| EBOV_MK2334_KU296366_SLE_Bombali_2015-02-23          | 15/02/23 | Genbank | Bombali | SL3.2.4 |
| EBOV_DML25180_KT357855_SLE_Kono_2015-02-23           | 15/02/23 | Genbank | Kono    | SL3.2.4 |
| EBOV_MK2307_KU296536_SLE_UNKNOWN_2015-02-23          | 15/02/23 | Genbank | UNKNOWN | SL3.2.4 |
| EBOV_12181_EMLH_KU296783_SLE_WesternUrban_2015-02-23 | 15/02/23 | Genbank | WAU     | SL3.2.4 |
| EBOV_12189_EMLH_KU296369_SLE_WesternUrban_2015-02-23 | 15/02/23 | Genbank | WAU     | SL3.2.4 |
| EBOV_12192_EMLH_KU296511_SLE_WesternUrban_2015-02-23 | 15/02/23 | Genbank | WAU     | SL3.2.4 |
| EBOV_12193_EMLH_KU296616_SLE_WesternUrban_2015-02-23 | 15/02/23 | Genbank | WAU     | SL3.2.4 |
| EBOV_MK2341_KU296494_SLE_Bombali_2015-02-24          | 15/02/24 | Genbank | Bombali | SL3.2.4 |
| EBOV_MK2342_KU296347_SLE_Bombali_2015-02-24          | 15/02/24 | Genbank | Bombali | SL3.2.4 |
| EBOV_MK2343_KU296640_SLE_Bombali_2015-02-24          | 15/02/24 | Genbank | Bombali | SL3.2.4 |
| EBOV_MK2344_KU296586_SLE_Bombali_2015-02-24          | 15/02/24 | Genbank | Bombali | SL3.2.4 |
| EBOV_MK2362_KU296842_SLE_Bombali_2015-02-24          | 15/02/24 | Genbank | Bombali | SL3.2.4 |
| EBOV_MK2364_KU296719_SLE_Bombali_2015-02-24          | 15/02/24 | Genbank | Bombali | SL3.2.4 |
| EBOV_MK2365_KU296363_SLE_Bombali_2015-02-25          | 15/02/25 | Genbank | Bombali | SL3.2.4 |
| EBOV_MK2366_KU296810_SLE_Bombali_2015-02-25          | 15/02/25 | Genbank | Bombali | SL3.2.4 |
| EBOV_MK2367_KU296652_SLE_Bombali_2015-02-25          | 15/02/25 | Genbank | Bombali | SL3.2.4 |
| EBOV_MK2369_KU296832_SLE_Bombali_2015-02-25          | 15/02/25 | Genbank | Bombali | SL3.2.4 |
| EBOV_MK2370_KU296760_SLE_Bombali_2015-02-25          | 15/02/25 | Genbank | Bombali | SL3.2.4 |
| EBOV_MK2371_KU296397_SLE_Bombali_2015-02-25          | 15/02/25 | Genbank | Bombali | SL3.2.4 |

|                                                      |          |         |           |         |
|------------------------------------------------------|----------|---------|-----------|---------|
| EBOV_MK2382_KU296686_SLE_Bombali_2015-02-25          | 15/02/25 | Genbank | Bombali   | SL3.2.4 |
| EBOV_MK2383_KU296583_SLE_Bombali_2015-02-25          | 15/02/25 | Genbank | Bombali   | SL3.2.4 |
| EBOV_MK2395_KU296336_SLE_Bombali_2015-02-25          | 15/02/25 | Genbank | Bombali   | SL3.2.4 |
| EBOV_MK2397_KU296444_SLE_Bombali_2015-02-25          | 15/02/25 | Genbank | Bombali   | SL3.2.4 |
| EBOV_MK2398_KU296578_SLE_Bombali_2015-02-25          | 15/02/25 | Genbank | Bombali   | SL3.2.4 |
| EBOV_MK2405_KU296542_SLE_Bombali_2015-02-25          | 15/02/25 | Genbank | Bombali   | SL3.2.4 |
| EBOV_MK2427_KU296759_SLE_Bombali_2015-02-25          | 15/02/25 | Genbank | Bombali   | SL3.2.4 |
| EBOV_MK2431_KU296562_SLE_Bombali_2015-02-25          | 15/02/25 | Genbank | Bombali   | SL3.2.4 |
| EBOV_PL3984_KU296330_SLE_PortLoko_2015-02-25         | 15/02/25 | Genbank | Port Loko | SL3.2.4 |
| EBOV_KT5382_KU296657_SLE_WesternRural_2015-02-25     | 15/02/25 | Genbank | WAR       | SL3.2.4 |
| EBOV_MK2436_KU296626_SLE_Bombali_2015-02-26          | 15/02/26 | Genbank | Bombali   | SL3.2.4 |
| EBOV_MK2437_KU296469_SLE_Bombali_2015-02-26          | 15/02/26 | Genbank | Bombali   | SL3.2.4 |
| EBOV_MK2447_KU296642_SLE_Bombali_2015-02-26          | 15/02/26 | Genbank | Bombali   | SL3.2.4 |
| EBOV_MK2448_KU296818_SLE_Bombali_2015-02-26          | 15/02/26 | Genbank | Bombali   | SL3.2.4 |
| EBOV_MK2449_KU296466_SLE_Bombali_2015-02-26          | 15/02/26 | Genbank | Bombali   | SL3.2.4 |
| EBOV_PL4059_KU296485_SLE_PortLoko_2015-02-26         | 15/02/26 | Genbank | Port Loko | SL3.2.4 |
| EBOV_DML12116_KT357815_SLE_WesternUrban_2015-02-26   | 15/02/26 | Genbank | WAU       | SL3.2.4 |
| EBOV_DML12117_KT357816_SLE_WesternUrban_2015-02-26   | 15/02/26 | Genbank | WAU       | SL3.2.4 |
| EBOV_MK2506_KU296360_SLE_Bombali_2015-02-27          | 15/02/27 | Genbank | Bombali   | SL3.2.4 |
| EBOV_KT5486_KU296680_SLE_UNKNOWN_2015-02-27          | 15/02/27 | Genbank | UNKNOWN   | SL3.2.4 |
| EBOV_12229_EMLH_KU296643_SLE_WesternRural_2015-02-27 | 15/02/27 | Genbank | WAR       | SL3.2.4 |
| EBOV_DML12120_KT357817_SLE_WesternUrban_2015-02-27   | 15/02/27 | Genbank | WAU       | SL3.2.4 |
| EBOV_PL4105_KU296694_SLE_PortLoko_2015-02-28         | 15/02/28 | Genbank | Port Loko | SL3.2.4 |
| EBOV_12242_EMLH_KU296604_SLE_WesternUrban_2015-02-28 | 15/02/28 | Genbank | WAU       | SL3.2.4 |
| EBOV_DML12137_KT357819_SLE_WesternUrban_2015-02-28   | 15/02/28 | Genbank | WAU       | SL3.2.4 |
| EBOV_MK2570_KU296346_SLE_Bombali_2015-03-01          | 15/03/01 | Genbank | Bombali   | SL3.2.4 |
| EBOV_12257_EMLH_KU296702_SLE_PortLoko_2015-03-01     | 15/03/01 | Genbank | Port Loko | SL3.2.4 |
| EBOV_PL4187_KU296567_SLE_PortLoko_2015-03-01         | 15/03/01 | Genbank | Port Loko | SL3.2.4 |
| EBOV_PL4190_KU296351_SLE_PortLoko_2015-03-01         | 15/03/01 | Genbank | Port Loko | SL3.2.4 |
| EBOV_PL4194_KU296501_SLE_PortLoko_2015-03-02         | 15/03/02 | Genbank | Port Loko | SL3.2.4 |
| EBOV_12275_EMLH_KU296538_SLE_WesternUrban_2015-03-02 | 15/03/02 | Genbank | WAU       | SL3.2.4 |
| EBOV_MK2673_KU296749_SLE_Bombali_2015-03-03          | 15/03/03 | Genbank | Bombali   | SL3.2.4 |
| EBOV_PL4292_KU296827_SLE_Kambia_2015-03-03           | 15/03/03 | Genbank | Kambia    | SL3.2.4 |
| EBOV_MK2717_KU296425_SLE_Bombali_2015-03-04          | 15/03/04 | Genbank | Bombali   | SL3.2.4 |

|                                                     |          |         |              |         |
|-----------------------------------------------------|----------|---------|--------------|---------|
| EBOV_PL4346_KU296641_SLE_Kambia_2015-03-04          | 15/03/04 | Genbank | Kambia       | SL3.2.4 |
| EBOV_DML12194_KT357818_SLE_WesternUrban_2015-03-04  | 15/03/04 | Genbank | WAU          | SL3.2.4 |
| EBOV_MK2710_KU296703_SLE_Bombali_2015-03-05         | 15/03/05 | Genbank | Bombali      | SL3.2.4 |
| EBOV_MK2724_KU296695_SLE_Bombali_2015-03-05         | 15/03/05 | Genbank | Bombali      | SL3.2.4 |
| EBOV_DML25344_KT357856_SLE_Kono_2015-03-06          | 15/03/06 | Genbank | Kono         | SL3.2.4 |
| NICD7034_SLE_WUR_2015-03-06                         | 15/03/06 | NICD    | WAU          | SL3.2.4 |
| EBOV_MK2788_KU296573_SLE_Bombali_2015-03-07         | 15/03/07 | Genbank | Bombali      | SL3.2.4 |
| EBOV_MK2789_KU296613_SLE_Bombali_2015-03-07         | 15/03/07 | Genbank | Bombali      | SL3.2.4 |
| EBOV_MK2790_KU296452_SLE_Bombali_2015-03-07         | 15/03/07 | Genbank | Bombali      | SL3.2.4 |
| EBOV_KT5786_KU296590_SLE_2015-03-07                 | 15/03/07 | Genbank | UNKNOWN      | SL3.2.4 |
| EBOV_KT5788_KU296704_SLE_2015-03-07                 | 15/03/07 | Genbank | UNKNOWN      | SL3.2.4 |
| EBOV_KT5787_KU296711_SLE_WesternUrban_2015-03-07    | 15/03/07 | Genbank | WAU          | SL3.2.4 |
| EBOV_KT5789_KU296713_SLE_WesternUrban_2015-03-07    | 15/03/07 | Genbank | WAU          | SL3.2.4 |
| NICD7036_SLE_WUR_2015-03-07                         | 15/03/07 | NICD    | WAU          | SL3.2.4 |
| EBOV_MK2825_KU296402_SLE_Bombali_2015-03-08         | 15/03/08 | Genbank | Bombali      | SL3.2.4 |
| EBOV_MK2826_KU296405_SLE_Bombali_2015-03-08         | 15/03/08 | Genbank | Bombali      | SL3.2.4 |
| EBOV_MK2850_KU296374_SLE_Bombali_2015-03-09         | 15/03/09 | Genbank | Bombali      | SL3.2.4 |
| EBOV_DML12239_KT357820_SLE_WesternUrban_2015-03-09  | 15/03/09 | Genbank | WAU          | SL3.2.4 |
| EBOV_DML12260_KT357821_SLE_WesternUrban_2015-03-09  | 15/03/09 | Genbank | WAU          | SL3.2.4 |
| EBOV_MK2900_KU296787_SLE_Bombali_2015-03-10         | 15/03/10 | Genbank | Bombali      | SL3.2.4 |
| EBOV_PL4569_KU296598_SLE_PortLoko_2015-03-10        | 15/03/10 | Genbank | Port Loko    | SL3.2.4 |
| EBOV_PL4570_KU296451_SLE_PortLoko_2015-03-10        | 15/03/10 | Genbank | Port Loko    | SL3.2.4 |
| EBOV_KT5832_KU296493_SLE_UNKNOWN_2015-03-10         | 15/03/10 | Genbank | UNKNOWN      | SL3.2.4 |
| EBOV_KT5858_KU296754_SLE_2015-03-10                 | 15/03/10 | Genbank | UNKNOWN      | SL3.2.4 |
| EBOV_KT5859_KU296463_SLE_UNKNOWN_2015-03-10         | 15/03/10 | Genbank | UNKNOWN      | SL3.2.4 |
| EBOV_DML12268_KT357822_SLE_WesternUrban_2015-03-10  | 15/03/10 | Genbank | WAU          | SL3.2.4 |
| EBOV_MK2938_KU296771_SLE_Bombali_2015-03-11         | 15/03/11 | Genbank | Bombali      | SL3.2.4 |
| EBOV_MK2983_KU296393_SLE_Bombali_2015-03-12         | 15/03/12 | Genbank | Bombali      | SL3.2.4 |
| EBOV_PL4651_KU296841_SLE_PortLoko_2015-03-12        | 15/03/12 | Genbank | Port Loko    | SL3.2.4 |
| EBOV_PL4671_KU296782_SLE_PortLoko_2015-03-12        | 15/03/12 | Genbank | Port Loko    | SL3.2.4 |
| EBOV_PL4679_KU296623_SLE_UNKNOWN_2015-03-12         | 15/03/12 | Genbank | UNKNOWN      | SL3.2.4 |
| EBOV_PL4680_KU296689_SLE_UNKNOWN_2015-03-12         | 15/03/12 | Genbank | UNKNOWN      | SL3.2.4 |
| EBOV_Makona-UK3_KR025228_SLE_WesternArea_2015-03-12 | 15/03/12 | Genbank | Western Area | SL3.2.4 |

|                                                      |          |         |           |         |
|------------------------------------------------------|----------|---------|-----------|---------|
| EBOV_PL4696_KU296513_SLE_PortLoko_2015-03-13         | 15/03/13 | Genbank | Port Loko | SL3.2.4 |
| EBOV_MK3043_KU296474_SLE_Bombali_2015-03-14          | 15/03/14 | Genbank | Bombali   | SL3.2.4 |
| EBOV_KT5974_KU296475_SLE_UNKNOWN_2015-03-16          | 15/03/16 | Genbank | UNKNOWN   | SL3.2.4 |
| EBOV_MK3183_KU296800_SLE_Bombali_2015-03-17          | 15/03/17 | Genbank | Bombali   | SL3.2.4 |
| EBOV_PL5001_KU296514_SLE_PortLoko_2015-03-19         | 15/03/19 | Genbank | Port Loko | SL3.2.4 |
| EBOV_PL5019_KU296627_SLE_PortLoko_2015-03-19         | 15/03/19 | Genbank | Port Loko | SL3.2.4 |
| EBOV_PL5099_KU296682_SLE_PortLoko_2015-03-19         | 15/03/19 | Genbank | Port Loko | SL3.2.4 |
| EBOV_12578_EMLH_KU296307_SLE_WesternRural_2015-03-20 | 15/03/20 | Genbank | WAR       | SL3.2.4 |
| EBOV_12579_EMLH_KU296548_SLE_WesternRural_2015-03-20 | 15/03/20 | Genbank | WAR       | SL3.2.4 |
| EBOV_12580_EMLH_KU296574_SLE_WesternRural_2015-03-20 | 15/03/20 | Genbank | WAR       | SL3.2.4 |
| EBOV_12600_EMLH_KU296449_SLE_WesternUrban_2015-03-21 | 15/03/21 | Genbank | WAU       | SL3.2.4 |
| EBOV_PL5179_KU296638_SLE_PortLoko_2015-03-22         | 15/03/22 | Genbank | Port Loko | SL3.2.4 |
| EBOV_PL5202_KU296396_SLE_PortLoko_2015-03-23         | 15/03/23 | Genbank | Port Loko | SL3.2.4 |
| EBOV_PL5228_KU296535_SLE_PortLoko_2015-03-23         | 15/03/23 | Genbank | Port Loko | SL3.2.4 |
| EBOV_12628_EMLH_KU296692_SLE_WesternRural_2015-03-23 | 15/03/23 | Genbank | WAR       | SL3.2.4 |
| EBOV_12634_EMLH_KU296653_SLE_WesternUrban_2015-03-24 | 15/03/24 | Genbank | WAU       | SL3.2.4 |
| EBOV_MK3462_KU296565_SLE_Bombali_2015-03-26          | 15/03/26 | Genbank | Bombali   | SL3.2.4 |
| EBOV_MK3479_KU296483_SLE_Bombali_2015-03-26          | 15/03/26 | Genbank | Bombali   | SL3.2.4 |
| EBOV_12666_EMLH_KU296803_SLE_WesternRural_2015-03-26 | 15/03/26 | Genbank | WAR       | SL3.2.4 |
| EBOV_DML12485_KT357824_SLE_WesternUrban_2015-03-31   | 15/03/31 | Genbank | WAU       | SL3.2.4 |
| EBOV_12757_EMLH_KU296468_SLE_WesternUrban_2015-04-03 | 15/04/03 | Genbank | WAU       | SL3.2.4 |
| EBOV_12767_EMLH_KU296768_SLE_WesternUrban_2015-04-04 | 15/04/04 | Genbank | WAU       | SL3.2.4 |
| EBOV_PL5868_KU296550_SLE_Kambia_2015-04-06           | 15/04/06 | Genbank | Kambia    | SL3.2.4 |
| EBOV_12781_EMLH_KU296520_SLE_WesternUrban_2015-04-06 | 15/04/06 | Genbank | WAU       | SL3.2.4 |
| EBOV_PL6086_KU296651_SLE_Kambia_2015-04-12           | 15/04/12 | Genbank | Kambia    | SL3.2.4 |
| EBOV_12851_EMLH_KU296671_SLE_WesternUrban_2015-04-15 | 15/04/15 | Genbank | WAU       | SL3.2.4 |
| EBOV_12854_EMLH_KU296729_SLE_WesternUrban_2015-04-15 | 15/04/15 | Genbank | WAU       | SL3.2.4 |
| EBOV_12855_EMLH_KU296723_SLE_WesternUrban_2015-04-15 | 15/04/15 | Genbank | WAU       | SL3.2.4 |
| EBOV_12872_EMLH_KU296560_SLE_WesternUrban_2015-04-18 | 15/04/18 | Genbank | WAU       | SL3.2.4 |
| EBOV_14782_EMLK_KU296639_SLE_Kambia_2015-04-23       | 15/04/23 | Genbank | Kambia    | SL3.2.4 |
| EBOV_14830_EMLK_KU296345_SLE_Kambia_2015-04-27       | 15/04/27 | Genbank | Kambia    | SL3.2.4 |
| EBOV_12916_EMLH_KU296318_SLE_WesternUrban_2015-04-29 | 15/04/29 | Genbank | WAU       | SL3.2.4 |
| EBOV_14888_EMLK_KU296423_SLE_Kambia_2015-05-03       | 15/05/03 | Genbank | Kambia    | SL3.2.4 |
| EBOV_12934_EMLH_KU296790_SLE_WesternUrban_2015-05-04 | 15/05/04 | Genbank | WAU       | SL3.2.4 |

|                                                       |          |         |           |         |
|-------------------------------------------------------|----------|---------|-----------|---------|
| EBOV_12936_EMLH_KU296561_SLE_WesternUrban_2015-05-04  | 15/05/04 | Genbank | WAU       | SL3.2.4 |
| EBOV_13031_EMLH_KU296665_SLE_WesternUrban_2015-05-18  | 15/05/18 | Genbank | WAU       | SL3.2.4 |
| EBOV_PL7483_KU296673_SLE_UNKNOWN_2015-05-31           | 15/05/31 | Genbank | UNKNOWN   | SL3.2.4 |
| EBOV_13204_EMLH_KU296544_SLE_WesternUrban_2015-06-16  | 15/06/16 | Genbank | WAU       | SL3.2.4 |
| EBOV_13247_EMLH_KU296830_SLE_UNKNOWN_2015-06-19       | 15/06/19 | Genbank | UNKNOWN   | SL3.2.4 |
| EBOV_13268_EMLH_KU296603_SLE_2015-06-23               | 15/06/23 | Genbank | UNKNOWN   | SL3.2.4 |
| EBOV_13275_EMLH_KU296430_SLE_WesternUrban_2015-06-24  | 15/06/24 | Genbank | WAU       | SL3.2.4 |
| EBOV_PL8486_KU296446_SLE_2015-06-25                   | 15/06/25 | Genbank | UNKNOWN   | SL3.2.4 |
| EBOV_DML14077_KT357860_SLE_WesternUrban_2015-06-30    | 15/06/30 | Genbank | WAU       | SL3.2.4 |
| EBOV_DML14163_KT357858_SLE_WesternUrban_2015-07-03    | 15/07/03 | Genbank | WAU       | SL3.2.4 |
| EBOV_18538_EMLH_KU296727_SLE_2015-07-04               | 15/07/04 | Genbank | UNKNOWN   | SL3.2.4 |
| EBOV_18596_EMLH_KU296715_SLE_WesternUrban_2015-07-05  | 15/07/05 | Genbank | WAU       | SL3.2.4 |
| EBOV_18636_EMLH_KU296460_SLE_UNKNOWN_2015-07-08       | 15/07/08 | Genbank | UNKNOWN   | SL3.2.4 |
| EBOV_18638R_EMLH_KU296348_SLE_WesternUrban_2015-07-08 | 15/07/08 | Genbank | WAU       | SL3.2.4 |
| EBOV_18642R_EMLH_KU296357_SLE_WesternUrban_2015-07-08 | 15/07/08 | Genbank | WAU       | SL3.2.4 |
| EBOV_18647_EMLH_KU296566_SLE_WesternUrban_2015-07-09  | 15/07/09 | Genbank | WAU       | SL3.2.4 |
| EBOV_18648_EMLH_KU296701_SLE_WesternUrban_2015-07-09  | 15/07/09 | Genbank | WAU       | SL3.2.4 |
| EBOV_18649_EMLH_KU296456_SLE_WesternUrban_2015-07-10  | 15/07/10 | Genbank | WAU       | SL3.2.4 |
| EBOV_18650_EMLH_KU296370_SLE_WesternUrban_2015-07-10  | 15/07/10 | Genbank | WAU       | SL3.2.4 |
| EBOV_18659R_EMLH_KU296585_SLE_WesternUrban_2015-07-10 | 15/07/10 | Genbank | WAU       | SL3.2.4 |
| EBOV_18660_EMLH_KU296838_SLE_WesternUrban_2015-07-10  | 15/07/10 | Genbank | WAU       | SL3.2.4 |
| EBOV_DML14366_KT357859_SLE_WesternUrban_2015-07-11    | 15/07/11 | Genbank | WAU       | SL3.2.4 |
| EBOV_18687R_EMLH_KU296650_SLE_WesternUrban_2015-07-12 | 15/07/12 | Genbank | WAU       | SL3.2.4 |
| EBOV_18706_EMLH_KU296599_SLE_UNKNOWN_2015-07-14       | 15/07/14 | Genbank | UNKNOWN   | SL3.2.4 |
| EBOV_MK9396_KU296321_SLE_WesternUrban_2015-07-18      | 15/07/18 | Genbank | WAU       | SL3.2.4 |
| EBOV_MK8878_KU296684_SLE_Tonkolili_2015-07-23         | 15/07/23 | Genbank | Tonkolili | SL3.2.4 |
| EBOV_MK10128_KU296502_SLE_Tonkolili_2015-07-31        | 15/07/31 | Genbank | Tonkolili | SL3.2.4 |
| EBOV_MK10173_KU296313_SLE_Tonkolili_2015-08-01        | 15/08/01 | Genbank | Tonkolili | SL3.2.4 |
| EBOV_15070R_DML_SLE_WesternUrban_2015-08-06           | 15/08/06 | Genbank | WAU       | SL3.2.4 |
| EBOV_G4868_KR105275_SLE_UNKNOWN_2014-08-10            | 14/08/10 | Genbank | UNKNOWN   | SL3.2.5 |
| EBOV_G5019_KR105294_SLE_Kenema_2014-08-16             | 14/08/16 | Genbank | Kenema    | SL3.2.5 |
| EBOV_20140024_KR653252_SLE_PortLoko_2014-08-20        | 14/08/20 | Genbank | Port Loko | SL3.2.5 |
| EBOV_G5304_KR105304_SLE_UNKNOWN_2014-08-28            | 14/08/28 | Genbank | UNKNOWN   | SL3.2.5 |
| NICD0086_SLE_BOM_2014-08-29                           | 14/08/29 | NICD    | Bombali   | SL3.2.5 |

|                                                |          |         |           |         |
|------------------------------------------------|----------|---------|-----------|---------|
| NICD0129_SLE_BOM_2014-08-31                    | 14/08/31 | NICD    | Bombali   | SL3.2.5 |
| NICD0188_SLE_BOM_2014-09-03                    | 14/09/03 | NICD    | Bombali   | SL3.2.5 |
| NICD0190_SLE_BOM_2014-09-03                    | 14/09/03 | NICD    | Bombali   | SL3.2.5 |
| NICD0193_SLE_BOM_2014-09-03                    | 14/09/03 | NICD    | Bombali   | SL3.2.5 |
| NICD0256_SLE_BOM_2014-09-04                    | 14/09/04 | NICD    | Bombali   | SL3.2.5 |
| NICD0234_SLE_PL_2014-09-04                     | 14/09/04 | NICD    | Port Loko | SL3.2.5 |
| NICD0235_SLE_PL_2014-09-04                     | 14/09/04 | NICD    | Port Loko | SL3.2.5 |
| NICD0257_SLE_BOM_2014-09-05                    | 14/09/05 | NICD    | Bombali   | SL3.2.5 |
| NICD0264_SLE_BOM_2014-09-05                    | 14/09/05 | NICD    | Bombali   | SL3.2.5 |
| NICD0299_SLE_PL_2014-09-05                     | 14/09/05 | NICD    | Port Loko | SL3.2.5 |
| NICD0369_SLE_BOM_2014-09-07                    | 14/09/07 | NICD    | Bombali   | SL3.2.5 |
| NICD0650_SLE_BOM_2014-09-15                    | 14/09/15 | NICD    | Bombali   | SL3.2.5 |
| NICD0637_SLE_TONK_2014-09-16                   | 14/09/16 | NICD    | Tonkolili | SL3.2.5 |
| NICD0782_SLE_BOM_2014-09-17                    | 14/09/17 | NICD    | Bombali   | SL3.2.5 |
| NICD0919_SLE_TONK_2014-09-19                   | 14/09/19 | NICD    | Tonkolili | SL3.2.5 |
| NICD1079_SLE_BOM_2014-09-20                    | 14/09/20 | NICD    | Bombali   | SL3.2.5 |
| NICD1089-Vero_SLE_BOM_2014-09-20               | 14/09/20 | NICD    | Bombali   | SL3.2.5 |
| NICD1201_SLE_TONK_2014-09-20                   | 14/09/20 | NICD    | Tonkolili | SL3.2.5 |
| NICD1100_SLE_BOM_2014-09-21                    | 14/09/21 | NICD    | Bombali   | SL3.2.5 |
| NICD1016_SLE_PL_2014-09-21                     | 14/09/21 | NICD    | Port Loko | SL3.2.5 |
| NICD1147_SLE_PL_2014-09-22                     | 14/09/22 | NICD    | Port Loko | SL3.2.5 |
| NICD1148_SLE_PL_2014-09-22                     | 14/09/22 | NICD    | Port Loko | SL3.2.5 |
| NICD1156_SLE_PL_2014-09-22                     | 14/09/22 | NICD    | Port Loko | SL3.2.5 |
| NICD1167_SLE_PL_2014-09-22                     | 14/09/22 | NICD    | Port Loko | SL3.2.5 |
| NICD1317_SLE_BOM_2014-09-24                    | 14/09/24 | NICD    | Bombali   | SL3.2.5 |
| EBOV_20141271_KR653261_SLE_PortLoko_2014-09-24 | 14/09/24 | Genbank | Port Loko | SL3.2.5 |
| EBOV_G5983_KR105333_SLE_UNKNOWN_2014-09-25     | 14/09/25 | Genbank | UNKNOWN   | SL3.2.5 |
| EBOV_G5996_KR105337_SLE_UNKNOWN_2014-09-25     | 14/09/25 | Genbank | UNKNOWN   | SL3.2.5 |
| EBOV_G5997_KR105338_SLE_UNKNOWN_2014-09-25     | 14/09/25 | Genbank | UNKNOWN   | SL3.2.5 |
| EBOV_G5998_KR105339_SLE_UNKNOWN_2014-09-25     | 14/09/25 | Genbank | UNKNOWN   | SL3.2.5 |
| NICD1422_SLE_PL_2014-09-26                     | 14/09/26 | NICD    | Port Loko | SL3.2.5 |
| NICD1430_SLE_PL_2014-09-26                     | 14/09/26 | NICD    | Port Loko | SL3.2.5 |
| EBOV_G6089_KR105345_SLE_Tonkolili_2014-09-27   | 14/09/27 | Genbank | Tonkolili | SL3.2.5 |
| EBOV_G6091_KR105346_SLE_Tonkolili_2014-09-27   | 14/09/27 | Genbank | Tonkolili | SL3.2.5 |

|                                                 |          |         |           |         |
|-------------------------------------------------|----------|---------|-----------|---------|
| EBOV_G6095_KR105347_SLE_Tonkolili_2014-09-27    | 14/09/27 | Genbank | Tonkolili | SL3.2.5 |
| EBOV_20141429_KR653260_SLE_Kono_2014-09-28      | 14/09/28 | Genbank | Kono      | SL3.2.5 |
| EBOV_J0009_KP759734_SLE_PortLoko_2014-09-28     | 14/09/28 | Genbank | Port Loko | SL3.2.5 |
| EBOV_J0010_KP759639_SLE_PortLoko_2014-09-28     | 14/09/28 | Genbank | Port Loko | SL3.2.5 |
| NICD1514_SLE_PL_2014-09-28                      | 14/09/28 | NICD    | Port Loko | SL3.2.5 |
| EBOV_J0034_KP759608_SLE_PortLoko_2014-09-30     | 14/09/30 | Genbank | Port Loko | SL3.2.5 |
| NICD1662-Vero_SLE_BOM_2014-10-01                | 14/10/01 | NICD    | Bombali   | SL3.2.5 |
| EBOV_J0035_KP759609_SLE_PortLoko_2014-10-01     | 14/10/01 | Genbank | Port Loko | SL3.2.5 |
| EBOV_J0023_KP759652_SLE_WesternRural_2014-10-01 | 14/10/01 | Genbank | WAR       | SL3.2.5 |
| EBOV_J0027_KP759678_SLE_Bombali_2014-10-02      | 14/10/02 | Genbank | Bombali   | SL3.2.5 |
| EBOV_J0025_KP759666_SLE_WesternRural_2014-10-02 | 14/10/02 | Genbank | WAR       | SL3.2.5 |
| EBOV_J0031_KP759607_SLE_PortLoko_2014-10-03     | 14/10/03 | Genbank | Port Loko | SL3.2.5 |
| EBOV_J0033_KP759692_SLE_PortLoko_2014-10-03     | 14/10/03 | Genbank | Port Loko | SL3.2.5 |
| EBOV_J0036_KP759694_SLE_PortLoko_2014-10-03     | 14/10/03 | Genbank | Port Loko | SL3.2.5 |
| EBOV_J0037_KP759615_SLE_PortLoko_2014-10-03     | 14/10/03 | Genbank | Port Loko | SL3.2.5 |
| EBOV_J0057_KP759635_SLE_PortLoko_2014-10-05     | 14/10/05 | Genbank | Port Loko | SL3.2.5 |
| EBOV_J0055_KP759723_SLE_PortLoko_2014-10-06     | 14/10/06 | Genbank | Port Loko | SL3.2.5 |
| EBOV_J0046_KP759715_SLE_WesternRural_2014-10-07 | 14/10/07 | Genbank | WAR       | SL3.2.5 |
| EBOV_J0056_KP759634_SLE_PortLoko_2014-10-08     | 14/10/08 | Genbank | Port Loko | SL3.2.5 |
| EBOV_J0058_KP759724_SLE_PortLoko_2014-10-08     | 14/10/08 | Genbank | Port Loko | SL3.2.5 |
| EBOV_J0067_KP759731_SLE_PortLoko_2014-10-09     | 14/10/09 | Genbank | Port Loko | SL3.2.5 |
| EBOV_J0070_KP759735_SLE_PortLoko_2014-10-09     | 14/10/09 | Genbank | Port Loko | SL3.2.5 |
| EBOV_J0071_KP759736_SLE_PortLoko_2014-10-09     | 14/10/09 | Genbank | Port Loko | SL3.2.5 |
| EBOV_J0072_KP759737_SLE_PortLoko_2014-10-09     | 14/10/09 | Genbank | Port Loko | SL3.2.5 |
| EBOV_J0062_KP759727_SLE_PortLoko_2014-10-10     | 14/10/10 | Genbank | Port Loko | SL3.2.5 |
| EBOV_J0063_KP759638_SLE_PortLoko_2014-10-10     | 14/10/10 | Genbank | Port Loko | SL3.2.5 |
| NICD2219_SLE_WUR_2014-10-14                     | 14/10/14 | NICD    | WAU       | SL3.2.5 |
| EBOV_J0084_KP759753_SLE_PortLoko_2014-10-16     | 14/10/16 | Genbank | Port Loko | SL3.2.5 |
| EBOV_J0082_KP759751_SLE_WesternRural_2014-10-16 | 14/10/16 | Genbank | WAR       | SL3.2.5 |
| NICD2308_SLE_WR_2014-10-16                      | 14/10/16 | NICD    | WAR       | SL3.2.5 |
| NICD2310_SLE_WR_2014-10-16                      | 14/10/16 | NICD    | WAR       | SL3.2.5 |
| EBOV_J0076_KP759744_SLE_WesternRural_2014-10-17 | 14/10/17 | Genbank | WAR       | SL3.2.5 |
| EBOV_J0083_KP759752_SLE_PortLoko_2014-10-18     | 14/10/18 | Genbank | Port Loko | SL3.2.5 |
| EBOV_20142551_KR653226_SLE_Koinadugu_2014-10-23 | 14/10/23 | Genbank | Koinadugu | SL3.2.5 |

|                                                    |          |         |              |         |
|----------------------------------------------------|----------|---------|--------------|---------|
| NICD2494_SLE_WR_2014-10-23                         | 14/10/23 | NICD    | WAR          | SL3.2.5 |
| EBOV_20142895_KR653268_SLE_Koinadugu_2014-10-24    | 14/10/24 | Genbank | Koinadugu    | SL3.2.5 |
| NICD2589_SLE_WR_2014-10-24                         | 14/10/24 | NICD    | WAR          | SL3.2.5 |
| EBOV_20143018_KR653272_SLE_WesternUrban_2014-10-26 | 14/10/26 | Genbank | WAU          | SL3.2.5 |
| EBOV_J0095_KP759653_SLE_WesternUrban_2014-10-27    | 14/10/27 | Genbank | WAU          | SL3.2.5 |
| EBOV_J0097_KP759762_SLE_WesternRural_2014-10-28    | 14/10/28 | Genbank | WAR          | SL3.2.5 |
| EBOV_J0122_KP759671_SLE_WesternUrban_2014-10-29    | 14/10/29 | Genbank | WAU          | SL3.2.5 |
| EBOV_20143360_KR653258_SLE_Kenema_2014-10-30       | 14/10/30 | Genbank | Kenema       | SL3.2.5 |
| EBOV_J0131_KP759680_SLE_PortLoko_2014-10-30        | 14/10/30 | Genbank | Port Loko    | SL3.2.5 |
| EBOV_J0120_KP759599_SLE_WesternRural_2014-10-30    | 14/10/30 | Genbank | WAR          | SL3.2.5 |
| EBOV_J0111_KP759595_SLE_WesternUrban_2014-10-30    | 14/10/30 | Genbank | WAU          | SL3.2.5 |
| EBOV_J0119_KP759667_SLE_WesternUrban_2014-10-30    | 14/10/30 | Genbank | WAU          | SL3.2.5 |
| EBOV_J0127_KP759676_SLE_WesternUrban_2014-10-30    | 14/10/30 | Genbank | WAU          | SL3.2.5 |
| EBOV_J0139_KP759687_SLE_WesternUrban_2014-10-30    | 14/10/30 | Genbank | WAU          | SL3.2.5 |
| EBOV_20143415_KR653248_SLE_WesternRural_2014-10-31 | 14/10/31 | Genbank | WAR          | SL3.2.5 |
| EBOV_J0125_KP759674_SLE_WesternRural_2014-10-31    | 14/10/31 | Genbank | WAR          | SL3.2.5 |
| EBOV_J0126_KP759675_SLE_WesternRural_2014-10-31    | 14/10/31 | Genbank | WAR          | SL3.2.5 |
| EBOV_J0109_KP759594_SLE_WesternUrban_2014-10-31    | 14/10/31 | Genbank | WAU          | SL3.2.5 |
| EBOV_J0110_KP759660_SLE_WesternUrban_2014-10-31    | 14/10/31 | Genbank | WAU          | SL3.2.5 |
| EBOV_J0128_KP759677_SLE_WesternUrban_2014-10-31    | 14/10/31 | Genbank | WAU          | SL3.2.5 |
| EBOV_20143550_KR653228_SLE_Bombali_2014-11-01      | 14/11/01 | Genbank | Bombali      | SL3.2.5 |
| EBOV_J0138_KP759686_SLE_WesternUrban_2014-11-01    | 14/11/01 | Genbank | WAU          | SL3.2.5 |
| EBOV_J0130_KP759679_SLE_PortLoko_2014-11-02        | 14/11/02 | Genbank | Port Loko    | SL3.2.5 |
| EBOV_20143648_KR653253_SLE_Koinadugu_2014-11-03    | 14/11/03 | Genbank | Koinadugu    | SL3.2.5 |
| EBOV_20143659_KR653256_SLE_Koinadugu_2014-11-03    | 14/11/03 | Genbank | Koinadugu    | SL3.2.5 |
| EBOV_20143918_KR653240_SLE_WesternRural_2014-11-06 | 14/11/06 | Genbank | WAR          | SL3.2.5 |
| EBOV_J0145_KP759693_SLE_WesternRural_2014-11-06    | 14/11/06 | Genbank | WAR          | SL3.2.5 |
| EBOV_20143938_KR653264_SLE_Koinadugu_2014-11-07    | 14/11/07 | Genbank | Koinadugu    | SL3.2.5 |
| EBOV_J0155_KP759697_SLE_WesternArea_2014-11-07     | 14/11/07 | Genbank | Western Area | SL3.2.5 |
| EBOV_J0158_KP759700_SLE_WesternRural_2014-11-08    | 14/11/08 | Genbank | WAR          | SL3.2.5 |
| EBOV_J0161_KP759701_SLE_WesternUrban_2014-11-08    | 14/11/08 | Genbank | WAU          | SL3.2.5 |
| EBOV_J0166_KP759704_SLE_WesternUrban_2014-11-08    | 14/11/08 | Genbank | WAU          | SL3.2.5 |
| EBOV_J0175_KP759709_SLE_WesternArea_2014-11-11     | 14/11/11 | Genbank | Western      | SL3.2.5 |



|                                                             |          |         | Area         |         |
|-------------------------------------------------------------|----------|---------|--------------|---------|
| EBOV_20144819_KR653299_SLE_Moyamba_2014-11-15               | 14/11/15 | Genbank | Moyamba      | SL3.2.5 |
| EBOV_20144820_KR653243_SLE_Moyamba_2014-11-15               | 14/11/15 | Genbank | Moyamba      | SL3.2.5 |
| NICD3304-swab_SLE_WUR_2014-11-15                            | 14/11/15 | NICD    | WAU          | SL3.2.5 |
| NICD3341_SLE_WUR_2014-11-16                                 | 14/11/16 | NICD    | WAU          | SL3.2.5 |
| NICD3420_SLE_WUR_2014-11-17                                 | 14/11/17 | NICD    | WAU          | SL3.2.5 |
| EBOV_Makona-Italy-INMI1_KP701371_SLE_WesternArea_2014-11-25 | 14/11/25 | Genbank | Western Area | SL3.2.5 |
| NICD4030-Vero_SLE_WR_2014-11-29                             | 14/11/29 | NICD    | WAR          | SL3.2.5 |
| NICD4072-swab_SLE_WUR_2014-11-30                            | 14/11/30 | NICD    | WAU          | SL3.2.5 |
| NICD4113_SLE_WUR_2014-12-01                                 | 14/12/01 | NICD    | WAU          | SL3.2.5 |
| NICD4329_SLE_WUR_2014-12-05                                 | 14/12/05 | NICD    | WAU          | SL3.2.5 |
| NICD4356_SLE_WUR_2014-12-06                                 | 14/12/06 | NICD    | WAU          | SL3.2.5 |
| EBOV_MK0020_KU296551_SLE_Bombali_2014-12-08                 | 14/12/08 | Genbank | Bombali      | SL3.2.5 |
| NICD5291_SLE_WUR_2014-12-25                                 | 14/12/25 | NICD    | WAU          | SL3.2.5 |
| NICD5293_SLE_WUR_2014-12-25                                 | 14/12/25 | NICD    | WAU          | SL3.2.5 |
| EBOV_20146578_KR653281_SLE_Koinadugu_2014-12-26             | 14/12/26 | Genbank | Koinadugu    | SL3.2.5 |
| NICD5311_SLE_WUR_2014-12-26                                 | 14/12/26 | NICD    | WAU          | SL3.2.5 |
| EBOV_MK0592_KU296814_SLE_Bombali_2014-12-28                 | 14/12/28 | Genbank | Bombali      | SL3.2.5 |
| EBOV_MK0574_KU296332_SLE_UNKNOWN_2014-12-28                 | 14/12/28 | Genbank | UNKNOWN      | SL3.2.5 |
| NICD5370_SLE_WR_2014-12-28                                  | 14/12/28 | NICD    | WAR          | SL3.2.5 |
| NICD5421_SLE_WUR_2014-12-30                                 | 14/12/30 | NICD    | WAU          | SL3.2.5 |
| EBOV_MK0704_KU296663_SLE_Bombali_2014-12-31                 | 14/12/31 | Genbank | Bombali      | SL3.2.5 |
| EBOV_MK0725_KU296629_SLE_Bombali_2015-01-01                 | 15/01/01 | Genbank | Bombali      | SL3.2.5 |
| EBOV_77585_EMLK_KU296734_SLE_WesternUrban_2015-01-04        | 15/01/04 | Genbank | WAU          | SL3.2.5 |
| EBOV_MK0879_KU296410_SLE_PortLoko_2015-01-05                | 15/01/05 | Genbank | Port Loko    | SL3.2.5 |
| EBOV_MK0864_KU296334_SLE_UNKNOWN_2015-01-05                 | 15/01/05 | Genbank | UNKNOWN      | SL3.2.5 |
| EBOV_MK0894_KU296356_SLE_Bombali_2015-01-06                 | 15/01/06 | Genbank | Bombali      | SL3.2.5 |
| EBOV_MK1156_KU296605_SLE_Bombali_2015-01-15                 | 15/01/15 | Genbank | Bombali      | SL3.2.5 |
| EBOV_75711_EMLH_KU296596_SLE_WesternUrban_2015-01-15        | 15/01/15 | Genbank | WAU          | SL3.2.5 |
| EBOV_KT5226_KU296297_SLE_UNKNOWN_2015-02-21                 | 15/02/21 | Genbank | UNKNOWN      | SL3.2.5 |
| EBOV_KT5320_KU296809_SLE_WesternRural_2015-02-24            | 15/02/24 | Genbank | WAR          | SL3.2.5 |
| EBOV_KT5388_KU296355_SLE_WesternRural_2015-02-25            | 15/02/25 | Genbank | WAR          | SL3.2.5 |
| NICD6823-swab_SLE_WUR_2015-02-26                            | 15/02/26 | NICD    | WAU          | SL3.2.5 |

|                                                      |          |         |           |         |
|------------------------------------------------------|----------|---------|-----------|---------|
| EBOV_MK2656_KU296577_SLE_Koinadugu_2015-03-03        | 15/03/03 | Genbank | Koinadugu | SL3.2.5 |
| EBOV_KT5738_KU296394_SLE_UNKNOWN_2015-03-06          | 15/03/06 | Genbank | UNKNOWN   | SL3.2.5 |
| EBOV_KT5734_KU296595_SLE_WesternRural_2015-03-06     | 15/03/06 | Genbank | WAR       | SL3.2.5 |
| EBOV_MK2918_KU296300_SLE_Koinadugu_2015-03-10        | 15/03/10 | Genbank | Koinadugu | SL3.2.5 |
| EBOV_MK3050_KU296445_SLE_Koinadugu_2015-03-14        | 15/03/14 | Genbank | Koinadugu | SL3.2.5 |
| EBOV_12615_EMLH_KU296521_SLE_WesternRural_2015-03-22 | 15/03/22 | Genbank | WAR       | SL3.2.5 |
| EBOV_DML12458_KT357823_SLE_WesternUrban_2015-03-28   | 15/03/28 | Genbank | WAU       | SL3.2.5 |
| EBOV_12705_EMLH_KU296490_SLE_WesternUrban_2015-03-29 | 15/03/29 | Genbank | WAU       | SL3.2.5 |
| EBOV_MK13013_KU296454_SLE_Bombali_2015-09-12         | 15/09/12 | Genbank | Bombali   | SL3.2.5 |

**Table S3. Required members for each sub-lineage**

|                                                                 |
|-----------------------------------------------------------------|
| <b>SL3.1.1</b>                                                  |
| 020380-EMLK_KU296775_SLE_Kambia_UNKNOWN_UNKNOWN_2015-08-28      |
| 020484-EMLK_KU296462_SLE_Kambia_UNKNOWN_UNKNOWN_2015-09-04      |
| 14743-EML_KU296298_SLE_Kambia_UNKNOWN_UNKNOWN_2015-04-19        |
| 14846-EMLK_KU296831_SLE_Kambia_UNKNOWN_UNKNOWN_2015-04-29       |
| 15000-EMLK_KU296504_SLE_Kambia_UNKNOWN_UNKNOWN_2015-05-13       |
| 15207R-EMLK_KU296488_SLE_Kambia_UNKNOWN_UNKNOWN_2015-05-29      |
| 15274-EMLK_KU296337_SLE_Kambia_UNKNOWN_UNKNOWN_2015-06-04       |
| 15314-EMLK_KU296600_SLE_Kambia_UNKNOWN_UNKNOWN_2015-06-06       |
| 15323-EMLK_KU296668_SLE_Kambia_UNKNOWN_UNKNOWN_2015-06-07       |
| 15327-EMLK_KU296649_SLE_Kambia_UNKNOWN_UNKNOWN_2015-06-07       |
| 15338-EMLK_KU296414_SLE_Kambia_UNKNOWN_UNKNOWN_2015-06-08       |
| 15349-EMLK_KU296442_SLE_Kambia_UNKNOWN_UNKNOWN_2015-06-09       |
| 15360-EMLK_KU296399_SLE_Kambia_UNKNOWN_UNKNOWN_2015-06-08       |
| 15373-EMLK_KU296802_SLE_Kambia_UNKNOWN_UNKNOWN_2015-06-10       |
| 15421-EMLK_KU296796_SLE_Kambia_UNKNOWN_UNKNOWN_2015-06-13       |
| 15438R-EMLK_KU296353_SLE_Kambia_UNKNOWN_UNKNOWN_2015-06-14      |
| 15470-EMLK_KU296543_SLE_Kambia_UNKNOWN_UNKNOWN_2015-06-16       |
| 15543-EMLK_KU296666_SLE_Kambia_UNKNOWN_UNKNOWN_2015-06-22       |
| 15661-EMLK_KU296822_SLE_Kambia_UNKNOWN_UNKNOWN_2015-06-28       |
| 15674-EMLK_KU296843_SLE_Kambia_UNKNOWN_UNKNOWN_2015-06-28       |
| 15686-EMLK_KU296555_SLE_Kambia_UNKNOWN_UNKNOWN_2015-06-30       |
| 19521-EMLK_KU296306_SLE_Kambia_UNKNOWN_UNKNOWN_2015-07-05       |
| 19560R-EMLK_KU296580_SLE_Kambia_UNKNOWN_UNKNOWN_2015-07-07      |
| 20142407_KR653249_SLE_Tonkolili_UNKNOWN_UNKNOWN_2014-10-16      |
| 20142417_KR653254_SLE_Bo_UNKNOWN_UNKNOWN_2014-10-19             |
| 20143964_KR653242_SLE_Bo_UNKNOWN_UNKNOWN_2014-11-07             |
| 20524-EMLK_KU296424_SLE_Kambia_UNKNOWN_UNKNOWN_2015-09-06       |
| 20525-EMLK_KU296487_SLE_Kambia_UNKNOWN_UNKNOWN_2015-09-06       |
| 20547-EMLK_KU296455_SLE_Kambia_UNKNOWN_UNKNOWN_2015-09-07       |
| 77577-EMLK_KU296533_SLE_WesternUrban_UNKNOWN_UNKNOWN_2015-01-03 |
| 77578-EMLK_KU296806_SLE_WesternUrban_UNKNOWN_UNKNOWN_2015-01-03 |
| 77588-EMLK_KU296801_SLE_WesternUrban_UNKNOWN_UNKNOWN_2015-01-04 |
| DML24708_KT357845_SLE_Kono_UNKNOWN_UNKNOWN_2015-01-28           |
| J0051_KP759633_SLE_WesternUrban_UNKNOWN_UNKNOWN_2014-10-07      |
| J0053_KP759721_SLE_WesternRural_UNKNOWN_UNKNOWN_2014-10-06      |
| J0054_KP759722_SLE_WesternRural_UNKNOWN_UNKNOWN_2014-10-06      |
| J0092_KP759650_SLE_WesternRural_UNKNOWN_UNKNOWN_2014-10-25      |
| J0099_KP759764_SLE_Kambia_UNKNOWN_UNKNOWN_2014-10-28            |
| J0137_KP759685_SLE_WesternRural_UNKNOWN_UNKNOWN_2014-11-01      |
| KT5022_KU296519_SLE_WesternRural_UNKNOWN_UNKNOWN_2015-02-13     |
| KT7095_KU296690_SLE_Kambia_UNKNOWN_UNKNOWN_2015-07-05           |
| NICD0143_XXXX_SLE_WesternUrban_Lumley_WestIII_2014-08-31        |

|                                                               |
|---------------------------------------------------------------|
| NICD1275_XXXX_SLE_WesternRural_UNKNOWN_UNKNOWN_2014-09-25     |
| NICD2763-Vero_XXXX_SLE_PortLoko_UNKNOWN_UNKNOWN_2014-11-06    |
| NICD3577_XXXX_SLE_WesternRural_UNKNOWN_UNKNOWN_2014-11-20     |
| NICD3926_XXXX_SLE_WesternUrban_FoulahTown_EastII_2014-11-27   |
| NICD5584_XXXX_SLE_WesternUrban_Wilberforce_WestIII_2015-01-01 |
| PL4226_KU296615_SLE_Kambia_UNKNOWN_UNKNOWN_2015-03-02         |
| PL4483_KU296389_SLE_Kambia_UNKNOWN_UNKNOWN_2015-03-08         |
| PL4736_KU296724_SLE_Kambia_UNKNOWN_UNKNOWN_2015-03-13         |
| PL4763_KU296503_SLE_Kambia_UNKNOWN_UNKNOWN_2015-03-14         |
| PL4864_KU296437_SLE_Kambia_UNKNOWN_UNKNOWN_2015-03-16         |
| PL4865_KU296633_SLE_Kambia_UNKNOWN_UNKNOWN_2015-03-16         |
| PL4866_KU296390_SLE_Kambia_UNKNOWN_UNKNOWN_2015-03-16         |
| PL5025_KU296412_SLE_Kambia_UNKNOWN_UNKNOWN_2015-03-20         |
| PL5157_KU296421_SLE_PortLoko_UNKNOWN_UNKNOWN_2015-03-22       |
| PL6049_KU296743_SLE_Kambia_UNKNOWN_UNKNOWN_2015-04-11         |
| PL6656_KU296523_SLE_PortLoko_UNKNOWN_UNKNOWN_2015-05-01       |
| PL7053_KU296757_SLE_PortLoko_UNKNOWN_UNKNOWN_2015-05-15       |
| PL7055_KU296484_SLE_PortLoko_UNKNOWN_UNKNOWN_2015-05-15       |
| PL7136b_KU296732_SLE_PortLoko_UNKNOWN_UNKNOWN_2015-05-18      |
| PL7375_KU296498_SLE_PortLoko_UNKNOWN_UNKNOWN_2015-05-27       |
| PL7376_KU296740_SLE_PortLoko_UNKNOWN_UNKNOWN_2015-05-27       |
| PL7401_KU296819_SLE_PortLoko_UNKNOWN_UNKNOWN_2015-05-27       |
| PL7429_KU296617_SLE_PortLoko_UNKNOWN_UNKNOWN_2015-05-29       |
| PL7451_KU296837_SLE_PortLoko_UNKNOWN_UNKNOWN_2015-05-29       |
| PL7496_KU296846_SLE_PortLoko_UNKNOWN_UNKNOWN_2015-05-31       |
| PL7511_KU296685_SLE_PortLoko_UNKNOWN_UNKNOWN_2015-06-01       |
| PL7551_KU296322_SLE_PortLoko_UNKNOWN_UNKNOWN_2015-06-02       |
| PL7577_KU296385_SLE_PortLoko_UNKNOWN_UNKNOWN_2015-06-03       |
| PL7604_KU296592_SLE_PortLoko_UNKNOWN_UNKNOWN_2015-06-04       |
| PL7605_KU296486_SLE_PortLoko_UNKNOWN_UNKNOWN_2015-06-04       |
| PL7626_KU296753_SLE_PortLoko_UNKNOWN_UNKNOWN_2015-06-04       |
| PL7678_KU296625_SLE_PortLoko_UNKNOWN_UNKNOWN_2015-06-06       |
| PL7685_KU296556_SLE_PortLoko_UNKNOWN_UNKNOWN_2015-06-06       |
| PL7689_KU296712_SLE_PortLoko_UNKNOWN_UNKNOWN_2015-06-06       |
| PL7709_KU296426_SLE_PortLoko_UNKNOWN_UNKNOWN_2015-06-06       |
| PL7792_KU296793_SLE_PortLoko_UNKNOWN_UNKNOWN_2015-06-09       |
| PL7801_KU296327_SLE_PortLoko_UNKNOWN_UNKNOWN_2015-06-09       |
| PL7820_KU296804_SLE_PortLoko_UNKNOWN_UNKNOWN_2015-06-09       |
| PL7834_KU296326_SLE_PortLoko_UNKNOWN_UNKNOWN_2015-06-10       |
| PL7946_KU296667_SLE_PortLoko_UNKNOWN_UNKNOWN_2015-06-12       |
| PL7947_KU296571_SLE_PortLoko_UNKNOWN_UNKNOWN_2015-06-12       |
| PL8128_KU296340_SLE_PortLoko_UNKNOWN_UNKNOWN_2015-06-16       |
| PL8172_KU296428_SLE_PortLoko_UNKNOWN_UNKNOWN_2015-06-18       |
| PL8310_KU296618_SLE_PortLoko_UNKNOWN_UNKNOWN_2015-06-21       |
| PL8429_KU296440_SLE_PortLoko_UNKNOWN_UNKNOWN_2015-06-24       |

|                                                                 |
|-----------------------------------------------------------------|
| PL8630_KU296325_SLE_PortLoko_UNKNOWN_UNKNOWN_2015-06-29         |
| PL8780_KU296404_SLE_PortLoko_UNKNOWN_UNKNOWN_2015-07-03         |
| PL8896_KU296342_SLE_PortLoko_UNKNOWN_UNKNOWN_2015-07-06         |
| PL9150_KU296522_SLE_PortLoko_UNKNOWN_UNKNOWN_2015-07-12         |
| PL9192_KU296401_SLE_PortLoko_UNKNOWN_UNKNOWN_2015-07-13         |
| PL9199_KU296371_SLE_PortLoko_UNKNOWN_UNKNOWN_2015-07-13         |
|                                                                 |
| <b>SL3.1.2</b>                                                  |
| 20140174_KR653294_SLE_WesternUrban_UNKNOWN_UNKNOWN_2014-08-27   |
| 20140872_KR653297_SLE_WesternUrban_UNKNOWN_UNKNOWN_2014-09-15   |
| 20141352_KR653284_SLE_Kambia_UNKNOWN_UNKNOWN_2014-09-26         |
| 20141397_KR653288_SLE_Moyamba_UNKNOWN_UNKNOWN_2014-09-28        |
| 20141997_KR653293_SLE_Kono_UNKNOWN_UNKNOWN_2014-10-10           |
| 20143317_KR653282_SLE_Bombali_UNKNOWN_UNKNOWN_2014-10-29        |
| 20143458_KR653245_SLE_Tonkolili_UNKNOWN_UNKNOWN_2014-11-01      |
| 20144521_KR653271_SLE_Kono_UNKNOWN_UNKNOWN_2014-11-12           |
| 20146001_KR653237_SLE_Kono_UNKNOWN_UNKNOWN_2014-11-24           |
| 361-EMLH_KU296420_SLE_WesternUrban_UNKNOWN_UNKNOWN_2015-01-21   |
| 508-EMLH_KU296304_SLE_WesternUrban_UNKNOWN_UNKNOWN_2015-01-31   |
| 539-EMLH_KU296823_SLE_WesternUrban_UNKNOWN_UNKNOWN_2015-02-02   |
| 75674-EMLH_KU296350_SLE_WesternUrban_UNKNOWN_UNKNOWN_2015-01-13 |
| 75731-EMLH_KU296564_SLE_WesternUrban_UNKNOWN_UNKNOWN_2015-01-16 |
| 77601-EMLK_KU296826_SLE_WesternUrban_UNKNOWN_UNKNOWN_2015-01-05 |
| DML24502_KT357825_SLE_Kono_UNKNOWN_UNKNOWN_2015-01-13           |
| DML24504_KT357826_SLE_Kono_UNKNOWN_UNKNOWN_2015-01-13           |
| DML24506_KT357827_SLE_Kono_UNKNOWN_UNKNOWN_2015-01-14           |
| DML24511_KT357828_SLE_Kono_UNKNOWN_UNKNOWN_2015-01-14           |
| DML24552_KT357829_SLE_Kono_UNKNOWN_UNKNOWN_2015-01-17           |
| DML24553_KT357830_SLE_Kono_UNKNOWN_UNKNOWN_2015-01-17           |
| DML24573_KT357831_SLE_Kono_UNKNOWN_UNKNOWN_2015-01-18           |
| DML24581_KT357832_SLE_Kono_UNKNOWN_UNKNOWN_2015-01-19           |
| DML24592_KT357833_SLE_Kono_UNKNOWN_UNKNOWN_2015-01-20           |
| DML24601_KT357834_SLE_Kono_UNKNOWN_UNKNOWN_2015-01-20           |
| DML24604_KT357835_SLE_Kono_UNKNOWN_UNKNOWN_2015-01-20           |
| DML24605_KT357836_SLE_Kono_UNKNOWN_UNKNOWN_2015-01-20           |
| DML24606_KT357837_SLE_Kono_UNKNOWN_UNKNOWN_2015-01-20           |
| DML24608_KT357838_SLE_Kono_UNKNOWN_UNKNOWN_2015-01-20           |
| DML24611_KT357839_SLE_Kono_UNKNOWN_UNKNOWN_2015-01-21           |
| DML24620_KT357840_SLE_Kono_UNKNOWN_UNKNOWN_2015-01-21           |
| DML24669_KT357841_SLE_Kono_UNKNOWN_UNKNOWN_2015-01-25           |
| DML24677_KT357842_SLE_Kono_UNKNOWN_UNKNOWN_2015-01-25           |
| DML24683_KT357843_SLE_Kono_UNKNOWN_UNKNOWN_2015-01-26           |
| DML24706_KT357844_SLE_Kono_UNKNOWN_UNKNOWN_2015-01-28           |
| DML24720_KT357846_SLE_Kono_UNKNOWN_UNKNOWN_2015-01-29           |
| DML24758_KT357847_SLE_Kono_UNKNOWN_UNKNOWN_2015-01-30           |

|                                                                   |
|-------------------------------------------------------------------|
| DML24818_KT357848_SLE_Kono_UNKNOWN_UNKNOWN_2015-02-03             |
| DML24825_KT357849_SLE_Tonkolili_UNKNOWN_UNKNOWN_2015-02-04        |
| DML24853_KT357850_SLE_Kono_UNKNOWN_UNKNOWN_2015-02-06             |
| DML24854_KT357851_SLE_Kono_UNKNOWN_UNKNOWN_2015-02-06             |
| DML25083_KT357852_SLE_Kono_UNKNOWN_UNKNOWN_2015-02-18             |
| DML25103_KT357853_SLE_Kono_UNKNOWN_UNKNOWN_2015-02-19             |
| DML25123_KT357854_SLE_Kenema_UNKNOWN_UNKNOWN_2015-02-18           |
| G5723_KR105319_SLE_Bonthe_UNKNOWN_UNKNOWN_2014-09-15              |
| G6069_KR105344_SLE_Kambia_UNKNOWN_UNKNOWN_2014-09-25              |
| G6103_KR105348_SLE_Moyamba_UNKNOWN_UNKNOWN_2014-09-28             |
| G6104_KR105349_SLE_Moyamba_UNKNOWN_UNKNOWN_2014-09-28             |
| J0001_KP759636_SLE_WesternRural_UNKNOWN_UNKNOWN_2014-09-27        |
| J0002_KP759640_SLE_WesternUrban_UNKNOWN_UNKNOWN_2014-09-27        |
| J0005_KP759628_SLE_WesternRural_UNKNOWN_UNKNOWN_2014-09-26        |
| J0007_KP759631_SLE_WesternRural_UNKNOWN_UNKNOWN_2014-09-27        |
| J0008_KP759718_SLE_WesternUrban_UNKNOWN_UNKNOWN_2014-09-29        |
| J0016_KP759742_SLE_WesternRural_UNKNOWN_UNKNOWN_2014-09-30        |
| J0024_KP759663_SLE_WesternRural_UNKNOWN_UNKNOWN_2014-09-29        |
| J0028_KP759683_SLE_Bombali_UNKNOWN_UNKNOWN_2014-10-02             |
| J0039_KP759620_SLE_PortLoko_UNKNOWN_UNKNOWN_2014-10-03            |
| J0042_KP759711_SLE_WesternRural_UNKNOWN_UNKNOWN_2014-10-04        |
| J0050_KP759719_SLE_WesternUrban_UNKNOWN_UNKNOWN_2014-10-05        |
| J0113_KP759662_SLE_WesternUrban_UNKNOWN_UNKNOWN_2014-10-30        |
| J0121_KP759669_SLE_WesternUrban_UNKNOWN_UNKNOWN_2014-10-29        |
| J0134_KP759682_SLE_WesternRural_UNKNOWN_UNKNOWN_2014-10-31        |
| J0135_KP759602_SLE_WesternRural_UNKNOWN_UNKNOWN_2014-11-03        |
| J0143_KP759604_SLE_Kambia_UNKNOWN_UNKNOWN_2014-11-04              |
| J0144_KP759605_SLE_Kambia_UNKNOWN_UNKNOWN_2014-11-04              |
| J0146_KP759610_SLE_WesternUrban_UNKNOWN_UNKNOWN_2014-11-07        |
| J0147_KP759611_SLE_WesternUrban_UNKNOWN_UNKNOWN_2014-11-07        |
| J0149_KP759695_SLE_WesternUrban_UNKNOWN_UNKNOWN_2014-11-07        |
| J0150_KP759696_SLE_WesternUrban_UNKNOWN_UNKNOWN_2014-11-06        |
| J0157_KP759699_SLE_WesternUrban_UNKNOWN_UNKNOWN_2014-11-06        |
| J0159_KP759619_SLE_WesternRural_UNKNOWN_UNKNOWN_2014-11-05        |
| J0171_KP759707_SLE_WesternRural_UNKNOWN_UNKNOWN_2014-11-10        |
| J0173_KP759627_SLE_WesternRural_UNKNOWN_UNKNOWN_2014-11-11        |
| MK0384_KU296628_SLE_Bombali_UNKNOWN_UNKNOWN_2014-12-22            |
| MK0885_KU296758_SLE_Bombali_UNKNOWN_UNKNOWN_2015-01-06            |
| MK1040_KU296528_SLE_Bombali_UNKNOWN_UNKNOWN_2015-01-11            |
| MK1079_KU296815_SLE_Bombali_UNKNOWN_UNKNOWN_2015-01-11            |
| NICD0022_XXXX_SLE_WesternUrban_Lumley_WestIII_2014-08-26          |
| NICD0031_XXXX_SLE_WesternUrban_Lumley_WestIII_2014-08-26          |
| NICD0034_XXXX_SLE_WesternUrban_Lumley_WestIII_2014-08-26          |
| NICD0393-Vero_XXXX_SLE_WesternUrban_Wellington_EastIII_2014-09-09 |
| NICD0821_XXXX_SLE_WesternRural_UNKNOWN_UNKNOWN_2014-09-20         |

|                                                                    |
|--------------------------------------------------------------------|
| NICD0983_XXXX_SLE_WesternUrban_Tengbehtown_WestIII_2014-09-22      |
| NICD0986-Vero_XXXX_SLE_WesternUrban_Wilberforce_WestIII_2014-09-22 |
| NICD1113_XXXX_SLE_Bombali_UNKNOWN_UNKNOWN_2014-09-19               |
| NICD1209-Vero_XXXX_SLE_WesternUrban_NewEngland_WestII_2014-09-23   |
| NICD1458_XXXX_SLE_WesternUrban_FoulahTown_EastII_2014-09-29        |
| NICD2031-Vero_XXXX_SLE_WesternUrban_Wilberforce_WestIII_2014-10-11 |
| NICD2032-Vero_XXXX_SLE_WesternUrban_Tengbehtown_WestIII_2014-10-11 |
| NICD2538_XXXX_SLE_WesternUrban_Kortright_EastII_2014-10-22         |
| NICD2541_XXXX_SLE_WesternUrban_NewEngland_WestII_2014-10-22        |
| NICD2748_XXXX_SLE_Kambia_UNKNOWN_UNKNOWN_2014-11-06                |
| NICD3031_XXXX_SLE_PortLoko_UNKNOWN_UNKNOWN_2014-11-11              |
| NICD3087_XXXX_SLE_WesternUrban_CongoTown_WestI_2014-11-13          |
| NICD3089_XXXX_SLE_PortLoko_UNKNOWN_UNKNOWN_2014-11-12              |
| NICD3335_XXXX_SLE_WesternRural_UNKNOWN_UNKNOWN_2014-11-16          |
| NICD3483-Vero_XXXX_SLE_WesternUrban_CalabaTown_EastIII_2014-11-18  |
| NICD3596_XXXX_SLE_WesternUrban_Wellington_EastIII_2014-11-21       |
| NICD3707_XXXX_SLE_WesternUrban_Kissy_EastIII_2014-11-24            |
| NICD3820_XXXX_SLE_WesternUrban_Magazine_CentralI_2014-11-25        |
| NICD3823_XXXX_SLE_WesternRural_UNKNOWN_UNKNOWN_2014-11-25          |
| NICD3925_XXXX_SLE_WesternUrban_Magazine_CentralI_2014-11-27        |
| NICD3928_XXXX_SLE_WesternUrban_AllenTown_EastIII_2014-11-26        |
| NICD3932_XXXX_SLE_WesternUrban_AllenTown_EastIII_2014-11-26        |
| NICD3937_XXXX_SLE_WesternUrban_AllenTown_EastIII_2014-11-26        |
| NICD4025-Vero_XXXX_SLE_WesternUrban_Wellington_EastIII_2014-11-29  |
| NICD4055_XXXX_SLE_WesternUrban_AllenTown_EastIII_2014-11-28        |
| NICD4064-swab_XXXX_SLE_WesternUrban_Freetown_WestII_2014-11-29     |
| NICD4279-Vero_XXXX_SLE_WesternUrban_Kissy_EastIII_2014-12-05       |
| NICD4682_XXXX_SLE_WesternUrban_AllenTown_EastIII_2014-12-13        |
| NICD4830_XXXX_SLE_WesternUrban_AllenTown_EastIII_2014-12-15        |
| NICD5200_XXXX_SLE_WesternUrban_Wellington_EastIII_2014-12-24       |
| NICD5260_XXXX_SLE_WesternUrban_Wellington_EastIII_2014-12-24       |
| NICD5266_XXXX_SLE_WesternUrban_AllenTown_EastIII_2014-12-24        |
| NICD5314_XXXX_SLE_WesternUrban_Wellington_EastIII_2014-12-26       |
| NICD5354_XXXX_SLE_WesternUrban_AllenTown_EastIII_2014-12-27        |
| NICD5360_XXXX_SLE_WesternUrban_AllenTown_EastIII_2014-12-27        |
| NICD5725_XXXX_SLE_WesternUrban_Wellington_EastIII_2015-01-07       |
| NICD6218_XXXX_SLE_WesternUrban_Magazine_CentralI_2015-01-24        |
| NICD6274_XXXX_SLE_WesternUrban_Magazine_CentralI_2015-01-26        |
| PL1387_KU296434_SLE_PortLoko_UNKNOWN_UNKNOWN_2015-01-04            |
| PL4119_KU296645_SLE_PortLoko_UNKNOWN_UNKNOWN_2015-02-28            |
| PL4197_KU296299_SLE_PortLoko_UNKNOWN_UNKNOWN_2015-03-02            |
| PL4203_KU296311_SLE_PortLoko_UNKNOWN_UNKNOWN_2015-03-02            |
| PL4248_KU296658_SLE_PortLoko_UNKNOWN_UNKNOWN_2015-03-03            |
| PL4249_KU296349_SLE_PortLoko_UNKNOWN_UNKNOWN_2015-03-03            |
| PL4283_KU296840_SLE_PortLoko_UNKNOWN_UNKNOWN_2015-03-03            |

|                                                               |
|---------------------------------------------------------------|
| PL4284_KU296829_SLE_PortLoko_UNKNOWN_UNKNOWN_2015-03-03       |
| PL4443_KU296418_SLE_PortLoko_UNKNOWN_UNKNOWN_2015-03-07       |
| PL4785_KU296688_SLE_PortLoko_UNKNOWN_UNKNOWN_2015-03-14       |
| PL4804_KU296766_SLE_PortLoko_UNKNOWN_UNKNOWN_2015-03-15       |
| PL4813_KU296798_SLE_PortLoko_UNKNOWN_UNKNOWN_2015-03-14       |
| PL4844_KU296527_SLE_PortLoko_UNKNOWN_UNKNOWN_2015-03-16       |
| PL4886_KU296461_SLE_PortLoko_UNKNOWN_UNKNOWN_2015-03-16       |
| PL4932_KU296547_SLE_PortLoko_UNKNOWN_UNKNOWN_2015-03-18       |
| PL5133_KU296489_SLE_PortLoko_UNKNOWN_UNKNOWN_2015-03-21       |
| PL5275_KU296439_SLE_PortLoko_UNKNOWN_UNKNOWN_2015-03-24       |
| PL5534_KU296784_SLE_PortLoko_UNKNOWN_UNKNOWN_2015-03-29       |
| PL5674_KU296699_SLE_PortLoko_UNKNOWN_UNKNOWN_2015-03-31       |
| PL5950_KU296559_SLE_PortLoko_UNKNOWN_UNKNOWN_2015-04-08       |
| KT2449_KU296465_SLE_WesternUrban_UNKNOWN_UNKNOWN_2014-12-05   |
| NICD6123_XXXX_SLE_WesternRural_UNKNOWN_UNKNOWN_2015-01-20     |
| NICD6141_XXXX_SLE_WesternRural_UNKNOWN_UNKNOWN_2015-01-21     |
| NICD6365_XXXX_SLE_WesternRural_UNKNOWN_UNKNOWN_2015-01-29     |
|                                                               |
| <b>SL3.2.1</b>                                                |
| 20140134_KR653227_SLE_Bombali_UNKNOWN_UNKNOWN_2014-08-26      |
| 20141232_KR653266_SLE_Tonkolili_UNKNOWN_UNKNOWN_2014-09-25    |
| 20141497_KR653273_SLE_Bombali_UNKNOWN_UNKNOWN_2014-10-01      |
| 20141960_KR653283_SLE_Tonkolili_UNKNOWN_UNKNOWN_2014-10-09    |
| 20142127_KR653234_SLE_Bombali_UNKNOWN_UNKNOWN_2014-10-12      |
| 20142260_KR653262_SLE_Bombali_UNKNOWN_UNKNOWN_2014-10-14      |
| 20142843_KR653301_SLE_Bombali_UNKNOWN_UNKNOWN_2014-10-23      |
| 20142856_KR653302_SLE_Tonkolili_UNKNOWN_UNKNOWN_2014-10-24    |
| 20143107_KR653247_SLE_Bombali_UNKNOWN_UNKNOWN_2014-10-25      |
| 20144192_KR653238_SLE_Bombali_UNKNOWN_UNKNOWN_2014-11-08      |
| 20144837_KR653259_SLE_Bombali_UNKNOWN_UNKNOWN_2014-11-14      |
| 20145835_KR653295_SLE_Tonkolili_UNKNOWN_UNKNOWN_2014-11-25    |
| 20146553_KR653224_SLE_Koinadugu_UNKNOWN_UNKNOWN_2014-12-22    |
| 466-EMLH_KU296433_SLE_WesternUrban_UNKNOWN_UNKNOWN_2015-01-28 |
| J0015_KP759741_SLE_Bombali_UNKNOWN_UNKNOWN_2014-09-26         |
| J0017_KP759747_SLE_Bombali_UNKNOWN_UNKNOWN_2014-09-26         |
| J0019_KP759754_SLE_Bombali_UNKNOWN_UNKNOWN_2014-09-25         |
| J0020_KP759755_SLE_Bombali_UNKNOWN_UNKNOWN_2014-09-25         |
| J0022_KP759757_SLE_Bombali_UNKNOWN_UNKNOWN_2014-09-25         |
| J0096_KP759654_SLE_WesternUrban_UNKNOWN_UNKNOWN_2014-10-27    |
| J0123_KP759672_SLE_WesternRural_UNKNOWN_UNKNOWN_2014-11-01    |
| J0152_KP759614_SLE_WesternRural_UNKNOWN_UNKNOWN_2014-11-07    |
| J0160_KP759621_SLE_WesternRural_UNKNOWN_UNKNOWN_2014-11-07    |
| MK0024_KU296705_SLE_Bombali_UNKNOWN_UNKNOWN_2014-12-08        |
| MK0045_KU296776_SLE_Bombali_UNKNOWN_UNKNOWN_2014-12-09        |
| MK0085_KU296738_SLE_Bombali_UNKNOWN_UNKNOWN_2014-12-10        |



|                                                           |
|-----------------------------------------------------------|
| MK0364_KU296453_SLE_Bombali_UNKNOWN_UNKNOWN_2014-12-21    |
| MK0365_KU296406_SLE_Bombali_UNKNOWN_UNKNOWN_2014-12-21    |
| MK0366_KU296320_SLE_Bombali_UNKNOWN_UNKNOWN_2014-12-21    |
| MK0367_KU296770_SLE_Bombali_UNKNOWN_UNKNOWN_2014-12-21    |
| MK0368_KU296718_SLE_Bombali_UNKNOWN_UNKNOWN_2014-12-21    |
| MK0369_KU296413_SLE_Bombali_UNKNOWN_UNKNOWN_2014-12-21    |
| MK0375_KU296606_SLE_Bombali_UNKNOWN_UNKNOWN_2014-12-22    |
| MK0379_KU296480_SLE_Bombali_UNKNOWN_UNKNOWN_2014-12-22    |
| MK0388_KU296630_SLE_Bombali_UNKNOWN_UNKNOWN_2014-12-22    |
| MK0390_KU296398_SLE_Bombali_UNKNOWN_UNKNOWN_2014-12-22    |
| MK0392_KU296691_SLE_Bombali_UNKNOWN_UNKNOWN_2014-12-22    |
| MK0425_KU296379_SLE_Bombali_UNKNOWN_UNKNOWN_2014-12-23    |
| MK0431_KU296621_SLE_Bombali_UNKNOWN_UNKNOWN_2014-12-23    |
| MK0433_KU296845_SLE_Bombali_UNKNOWN_UNKNOWN_2014-12-23    |
| MK0434_KU296554_SLE_Bombali_UNKNOWN_UNKNOWN_2014-12-23    |
| MK0491_KU296510_SLE_Bombali_UNKNOWN_UNKNOWN_2014-12-23    |
| MK0531_KU296448_SLE_Bombali_UNKNOWN_UNKNOWN_2014-12-26    |
| MK0549_KU296825_SLE_Bombali_UNKNOWN_UNKNOWN_2014-12-27    |
| MK0584_KU296339_SLE_Bombali_UNKNOWN_UNKNOWN_2014-12-28    |
| MK0709_KU296373_SLE_Tonkolili_UNKNOWN_UNKNOWN_2014-12-31  |
| MK0869_KU296534_SLE_Bombali_UNKNOWN_UNKNOWN_2015-01-05    |
| MK0966_KU296507_SLE_Bombali_UNKNOWN_UNKNOWN_2015-01-08    |
| MK1000_KU296384_SLE_Bombali_UNKNOWN_UNKNOWN_2015-01-10    |
| MK1014_KU296316_SLE_Bombali_UNKNOWN_UNKNOWN_2015-01-10    |
| MK1036_KU296834_SLE_Bombali_UNKNOWN_UNKNOWN_2015-01-11    |
| MK1197_KU296301_SLE_Bombali_UNKNOWN_UNKNOWN_2015-01-17    |
| MK1202_KU296581_SLE_Bombali_UNKNOWN_UNKNOWN_2015-01-17    |
| MK1320_KU296354_SLE_Bombali_UNKNOWN_UNKNOWN_2015-01-20    |
| MK4165_KU296575_SLE_Koinadugu_UNKNOWN_UNKNOWN_2015-04-16  |
| NICD0689_XXXX_SLE_Tonkolili_UNKNOWN_UNKNOWN_2014-09-17    |
| NICD0787_XXXX_SLE_Bombali_UNKNOWN_UNKNOWN_2014-09-17      |
| NICD0905_XXXX_SLE_Tonkolili_UNKNOWN_UNKNOWN_2014-09-20    |
| NICD0908_XXXX_SLE_Tonkolili_UNKNOWN_UNKNOWN_2014-09-20    |
| NICD0911_XXXX_SLE_Tonkolili_UNKNOWN_UNKNOWN_2014-09-20    |
| NICD0964_XXXX_SLE_Tonkolili_UNKNOWN_UNKNOWN_2014-09-21    |
| NICD1081_XXXX_SLE_Bombali_UNKNOWN_UNKNOWN_2014-09-20      |
| NICD1092_XXXX_SLE_Bombali_UNKNOWN_UNKNOWN_2014-09-20      |
| NICD1105_XXXX_SLE_Bombali_UNKNOWN_UNKNOWN_2014-09-21      |
| NICD1109_XXXX_SLE_Bombali_UNKNOWN_UNKNOWN_2014-09-19      |
| NICD1136_XXXX_SLE_WesternRural_UNKNOWN_UNKNOWN_2014-09-23 |
| NICD1142_XXXX_SLE_PortLoko_UNKNOWN_UNKNOWN_2014-09-22     |
| NICD1143_XXXX_SLE_PortLoko_UNKNOWN_UNKNOWN_2014-09-23     |
| NICD1227_XXXX_SLE_Bombali_UNKNOWN_UNKNOWN_2014-09-22      |
| NICD1256-Vero_XXXX_SLE_Bombali_UNKNOWN_UNKNOWN_2014-09-22 |
| NICD1261_XXXX_SLE_Bombali_UNKNOWN_UNKNOWN_2014-09-22      |

|                                                                    |
|--------------------------------------------------------------------|
| NICD1272-Vero_XXXX_SLE_Bombali_UNKNOWN_UNKNOWN_2014-09-22          |
| NICD1329-Vero_XXXX_SLE_Bombali_UNKNOWN_UNKNOWN_2014-09-24          |
| NICD3208-Vero_XXXX_SLE_WesternRural_UNKNOWN_UNKNOWN_2014-11-14     |
| NICD3294_XXXX_SLE_WesternRural_UNKNOWN_UNKNOWN_2014-11-14          |
| NICD3608-Vero_XXXX_SLE_WesternRural_UNKNOWN_UNKNOWN_2014-11-21     |
| NICD3693-Vero_XXXX_SLE_WesternRural_UNKNOWN_UNKNOWN_2014-11-23     |
| NICD4513-Vero_XXXX_SLE_WesternUrban_NewEngland_WestII_2014-12-09   |
| NICD4670_XXXX_SLE_WesternUrban_TowerHill_CentralII_2014-12-12      |
| NICD4672_XXXX_SLE_WesternUrban_Kortright_EastII_2014-12-12         |
| NICD4691_XXXX_SLE_WesternUrban_NewEngland_WestII_2014-12-11        |
| NICD4692_XXXX_SLE_WesternUrban_MountAureol_EastII_2014-12-13       |
| PL2921_KU296506_SLE_Kambia_UNKNOWN_UNKNOWN_2015-02-03              |
|                                                                    |
| <b>SL3.2.2</b>                                                     |
| NICD1049_XXXX_SLE_PortLoko_UNKNOWN_UNKNOWN_2014-09-21              |
| J0073_KP759738_SLE_PortLoko_UNKNOWN_UNKNOWN_2014-10-12             |
| J0142_KP759690_SLE_WesternUrban_UNKNOWN_UNKNOWN_2014-11-03         |
| NICD0900_XXXX_SLE_PortLoko_UNKNOWN_UNKNOWN_2014-09-20              |
| J0115_KP759597_SLE_PortLoko_UNKNOWN_UNKNOWN_2014-10-29             |
| J0114_KP759596_SLE_PortLoko_UNKNOWN_UNKNOWN_2014-10-29             |
| KT2315_KU296812_SLE_PortLoko_UNKNOWN_UNKNOWN_2014-12-02            |
| KT2316_KU296774_SLE_PortLoko_UNKNOWN_UNKNOWN_2014-12-02            |
| NICD0894_XXXX_SLE_PortLoko_UNKNOWN_UNKNOWN_2014-09-20              |
| NICD0720-Vero_XXXX_SLE_PortLoko_UNKNOWN_UNKNOWN_2014-09-16         |
| J0061_KP759637_SLE_PortLoko_UNKNOWN_UNKNOWN_2014-10-10             |
| NICD0721_XXXX_SLE_PortLoko_UNKNOWN_UNKNOWN_2014-09-16              |
| NICD0899_XXXX_SLE_PortLoko_UNKNOWN_UNKNOWN_2014-09-20              |
| J0018_KP759644_SLE_WesternRural_UNKNOWN_UNKNOWN_2014-09-30         |
| J0164_KP759623_SLE_WesternRural_UNKNOWN_UNKNOWN_2014-11-09         |
| J0029_KP759688_SLE_PortLoko_UNKNOWN_UNKNOWN_2014-09-29             |
| 75750-EMLH_KU296464_SLE_WesternUrban_UNKNOWN_UNKNOWN_2015-01-17    |
| J0030_KP759606_SLE_PortLoko_UNKNOWN_UNKNOWN_2014-10-03             |
| J0011_KP759641_SLE_PortLoko_UNKNOWN_UNKNOWN_2014-09-29             |
| NICD1396_XXXX_SLE_PortLoko_UNKNOWN_UNKNOWN_2014-09-25              |
| 20141288_KR653232_SLE_PortLoko_UNKNOWN_UNKNOWN_2014-09-23          |
| NICD0878_XXXX_SLE_PortLoko_UNKNOWN_UNKNOWN_2014-09-20              |
| NICD4795-swab_XXXX_SLE_WesternUrban_Freetown_WestII_2014-12-14     |
| 77581-EMLK_KU296540_SLE_WesternUrban_UNKNOWN_UNKNOWN_2015-01-03    |
| 77582-EMLK_KU296816_SLE_WesternUrban_UNKNOWN_UNKNOWN_2015-01-03    |
| NICD5367-swab_XXXX_SLE_WesternUrban_Tengbehtown_WestIII_2014-12-27 |
| 77594-EMLK_KU296343_SLE_WesternUrban_UNKNOWN_UNKNOWN_2015-01-04    |
| 77706-EMLK_KU296572_SLE_WesternUrban_UNKNOWN_UNKNOWN_2015-01-10    |
| J0140_KP759603_SLE_WesternRural_UNKNOWN_UNKNOWN_2014-10-30         |
| 20143036_KR653285_SLE_PortLoko_UNKNOWN_UNKNOWN_2014-10-24          |
| J0012_KP759642_SLE_PortLoko_UNKNOWN_UNKNOWN_2014-09-29             |

|                                                                 |
|-----------------------------------------------------------------|
| J0014_KP759740_SLE_PortLoko_UNKNOWN_UNKNOWN_2014-09-29          |
| J0013_KP759643_SLE_PortLoko_UNKNOWN_UNKNOWN_2014-09-28          |
| NICD0338_XXXX_SLE_PortLoko_UNKNOWN_UNKNOWN_2014-09-08           |
| NICD0424_XXXX_SLE_Tonkolili_UNKNOWN_UNKNOWN_2014-09-10          |
| NICD3097_XXXX_SLE_PortLoko_UNKNOWN_UNKNOWN_2014-11-12           |
| NICD2974-swab_XXXX_SLE_PortLoko_UNKNOWN_UNKNOWN_2014-11-08      |
| 75688-EMLH_KU296672_SLE_WesternRural_UNKNOWN_UNKNOWN_2015-01-14 |
| 362-EMLH_KU296505_SLE_WesternUrban_UNKNOWN_UNKNOWN_2015-01-21   |
| NICD6079_XXXX_SLE_WesternUrban_Kortright_EastII_2015-01-17      |
| J0163_KP759702_SLE_PortLoko_UNKNOWN_UNKNOWN_2014-11-08          |
| PL4256_KU296509_SLE_PortLoko_UNKNOWN_UNKNOWN_2015-03-03         |
| PL4127_KU296529_SLE_PortLoko_UNKNOWN_UNKNOWN_2015-02-28         |
| PL5201_KU296612_SLE_PortLoko_UNKNOWN_UNKNOWN_2015-03-23         |
| PL4028_KU296552_SLE_PortLoko_UNKNOWN_UNKNOWN_2015-02-26         |
| PL4123_KU296752_SLE_PortLoko_UNKNOWN_UNKNOWN_2015-02-28         |
| PL4322_KU296677_SLE_PortLoko_UNKNOWN_UNKNOWN_2015-03-05         |
| PL4784_KU296660_SLE_PortLoko_UNKNOWN_UNKNOWN_2015-03-14         |
| PL4125_KU296471_SLE_PortLoko_UNKNOWN_UNKNOWN_2015-02-28         |
| PL4561_KU296725_SLE_PortLoko_UNKNOWN_UNKNOWN_2015-03-10         |
| PL4330_KU296624_SLE_PortLoko_UNKNOWN_UNKNOWN_2015-03-05         |
| PL4169_KU296828_SLE_PortLoko_UNKNOWN_UNKNOWN_2015-03-01         |
| PL4126_KU296478_SLE_PortLoko_UNKNOWN_UNKNOWN_2015-02-28         |
| PL4121_KU296305_SLE_PortLoko_UNKNOWN_UNKNOWN_2015-02-28         |
| J0049_KP759717_SLE_PortLoko_UNKNOWN_UNKNOWN_2014-10-07          |
| NICD0108_XXXX_SLE_PortLoko_UNKNOWN_UNKNOWN_2014-08-30           |
| NICD0104_XXXX_SLE_WesternRural_UNKNOWN_UNKNOWN_2014-08-30       |
| 20140433_KR653246_SLE_Tonkolili_UNKNOWN_UNKNOWN_2014-09-03      |
| G4956_KR105282_SLE_Tonkolili_UNKNOWN_UNKNOWN_2014-08-13         |
| G4972_KR105285_SLE_Kenema_UNKNOWN_UNKNOWN_2014-08-14            |
|                                                                 |
| <b>SL3.2.3</b>                                                  |
| G4999_KR105291_SLE_Kenema_UNKNOWN_UNKNOWN_2014-08-15            |
| 20140436_KR653287_SLE_Moyamba_UNKNOWN_UNKNOWN_2014-09-03        |
| G5691_KR105318_SLE_Kenema_UNKNOWN_UNKNOWN_2014-09-14            |
| G5520_KR105308_SLE_Kenema_UNKNOWN_UNKNOWN_2014-09-05            |
| G5617_KR105312_SLE_Kenema_UNKNOWN_UNKNOWN_2014-09-10            |
| 20141491_KR653289_SLE_Kambia_UNKNOWN_UNKNOWN_2014-10-01         |
| J0048_KP759716_SLE_WesternRural_UNKNOWN_UNKNOWN_2014-10-05      |
| NICD0013_XXXX_SLE_WesternRural_UNKNOWN_UNKNOWN_2014-08-26       |
| G4725_KR105267_SLE_Moyamba_UNKNOWN_UNKNOWN_2014-08-04           |
| G5064_KR105297_SLE_Moyamba_UNKNOWN_UNKNOWN_2014-08-17           |
| J0088_KP759648_SLE_PortLoko_UNKNOWN_UNKNOWN_2014-10-20          |
| NICD1051_XXXX_SLE_PortLoko_UNKNOWN_UNKNOWN_2014-09-21           |
| J0032_KP759691_SLE_PortLoko_UNKNOWN_UNKNOWN_2014-09-30          |
| J0141_KP759689_SLE_WesternRural_UNKNOWN_UNKNOWN_2014-11-04      |

|                                                                   |
|-------------------------------------------------------------------|
| J0074_KP759739_SLE_WesternRural_UNKNOWN_UNKNOWN_2014-10-13        |
| NICD3670_XXXX_SLE_WesternRural_UNKNOWN_UNKNOWN_2014-11-22         |
| J0003_KP759651_SLE_PortLoko_UNKNOWN_UNKNOWN_2014-09-28            |
| J0079_KP759748_SLE_WesternRural_UNKNOWN_UNKNOWN_2014-10-16        |
| J0165_KP759703_SLE_WesternUrban_UNKNOWN_UNKNOWN_2014-11-08        |
| NICD2521-swab_XXXX_SLE_WesternUrban_CalabaTown_EastIII_2014-10-23 |
| NICD0856-Vero_XXXX_SLE_WesternRural_UNKNOWN_UNKNOWN_2014-09-20    |
| J0118_KP759598_SLE_WesternRural_UNKNOWN_UNKNOWN_2014-10-31        |
| 20140091_KR653239_SLE_WesternRural_UNKNOWN_UNKNOWN_2014-08-22     |
| NICD1043_XXXX_SLE_PortLoko_UNKNOWN_UNKNOWN_2014-09-22             |
| 20141282_KR653229_SLE_Kambia_UNKNOWN_UNKNOWN_2014-09-23           |
| J0105_KP759766_SLE_PortLoko_UNKNOWN_UNKNOWN_2014-10-29            |
| J0103_KP759658_SLE_PortLoko_UNKNOWN_UNKNOWN_2014-10-29            |
| J0102_KP759657_SLE_PortLoko_UNKNOWN_UNKNOWN_2014-10-27            |
| J0104_KP759765_SLE_PortLoko_UNKNOWN_UNKNOWN_2014-10-29            |
| J0038_KP759618_SLE_PortLoko_UNKNOWN_UNKNOWN_2014-09-30            |
| NICD0032_XXXX_SLE_Moyamba_UNKNOWN_UNKNOWN_2014-08-27              |
| G5853_KR105329_SLE_Moyamba_UNKNOWN_UNKNOWN_2014-09-21             |
| G5516_KR105307_SLE_Moyamba_UNKNOWN_UNKNOWN_2014-09-04             |
| G5738_KR105322_SLE_Moyamba_UNKNOWN_UNKNOWN_2014-09-15             |
| J0085_KP759645_SLE_PortLoko_UNKNOWN_UNKNOWN_2014-10-17            |
| NICD0110_XXXX_SLE_PortLoko_UNKNOWN_UNKNOWN_2014-08-30             |
| NICD0298_XXXX_SLE_PortLoko_UNKNOWN_UNKNOWN_2014-09-05             |
| NICD2965-Vero_XXXX_SLE_PortLoko_UNKNOWN_UNKNOWN_2014-11-10        |
| J0101_KP759656_SLE_PortLoko_UNKNOWN_UNKNOWN_2014-10-29            |
| 20144865_KR653231_SLE_PortLoko_UNKNOWN_UNKNOWN_2014-11-13         |
|                                                                   |
| <b>SL3.2.4</b>                                                    |
| 10402-EMLK_KU296635_SLE_WesternUrban_UNKNOWN_UNKNOWN_2015-02-10   |
| 10415-EMLK_KU296741_SLE_WesternUrban_UNKNOWN_UNKNOWN_2015-02-10   |
| 10454-EMLK_KU296679_SLE_WesternUrban_UNKNOWN_UNKNOWN_2015-02-12   |
| 10455-EMLK_KU296388_SLE_WesternUrban_UNKNOWN_UNKNOWN_2015-02-12   |
| 12004-EMLH_KU296302_SLE_WesternRural_UNKNOWN_UNKNOWN_2015-02-14   |
| 12178-EMLH_KU296525_SLE_WesternUrban_UNKNOWN_UNKNOWN_2015-02-22   |
| 12179-EMLH_KU296531_SLE_WesternUrban_UNKNOWN_UNKNOWN_2015-02-22   |
| 12180-EMLH_KU296310_SLE_WesternUrban_UNKNOWN_UNKNOWN_2015-02-22   |
| 12181-EMLH_KU296783_SLE_WesternUrban_UNKNOWN_UNKNOWN_2015-02-23   |
| 12189-EMLH_KU296369_SLE_WesternUrban_UNKNOWN_UNKNOWN_2015-02-23   |
| 12192-EMLH_KU296511_SLE_WesternUrban_UNKNOWN_UNKNOWN_2015-02-23   |
| 12193-EMLH_KU296616_SLE_WesternUrban_UNKNOWN_UNKNOWN_2015-02-23   |
| 12229-EMLH_KU296643_SLE_WesternRural_UNKNOWN_UNKNOWN_2015-02-27   |
| 12242-EMLH_KU296604_SLE_WesternUrban_UNKNOWN_UNKNOWN_2015-02-28   |
| 12257-EMLH_KU296702_SLE_PortLoko_UNKNOWN_UNKNOWN_2015-03-01       |
| 12275-EMLH_KU296538_SLE_WesternUrban_UNKNOWN_UNKNOWN_2015-03-02   |
| 12578-EMLH_KU296307_SLE_WesternRural_UNKNOWN_UNKNOWN_2015-03-20   |

|                                                                  |
|------------------------------------------------------------------|
| 12579-EMLH_KU296548_SLE_WesternRural_UNKNOWN_UNKNOWN_2015-03-20  |
| 12580-EMLH_KU296574_SLE_WesternRural_UNKNOWN_UNKNOWN_2015-03-20  |
| 12600-EMLH_KU296449_SLE_WesternUrban_UNKNOWN_UNKNOWN_2015-03-21  |
| 12628-EMLH_KU296692_SLE_WesternRural_UNKNOWN_UNKNOWN_2015-03-23  |
| 12634-EMLH_KU296653_SLE_WesternUrban_UNKNOWN_UNKNOWN_2015-03-24  |
| 12666-EMLH_KU296803_SLE_WesternRural_UNKNOWN_UNKNOWN_2015-03-26  |
| 12757-EMLH_KU296468_SLE_WesternUrban_UNKNOWN_UNKNOWN_2015-04-03  |
| 12767-EMLH_KU296768_SLE_WesternUrban_UNKNOWN_UNKNOWN_2015-04-04  |
| 12781-EMLH_KU296520_SLE_WesternUrban_UNKNOWN_UNKNOWN_2015-04-06  |
| 12851-EMLH_KU296671_SLE_WesternUrban_UNKNOWN_UNKNOWN_2015-04-15  |
| 12854-EMLH_KU296729_SLE_WesternUrban_UNKNOWN_UNKNOWN_2015-04-15  |
| 12855-EMLH_KU296723_SLE_WesternUrban_UNKNOWN_UNKNOWN_2015-04-15  |
| 12872-EMLH_KU296560_SLE_WesternUrban_UNKNOWN_UNKNOWN_2015-04-18  |
| 12916-EMLH_KU296318_SLE_WesternUrban_UNKNOWN_UNKNOWN_2015-04-29  |
| 12934-EMLH_KU296790_SLE_WesternUrban_UNKNOWN_UNKNOWN_2015-05-04  |
| 12936-EMLH_KU296561_SLE_WesternUrban_UNKNOWN_UNKNOWN_2015-05-04  |
| 13031-EMLH_KU296665_SLE_WesternUrban_UNKNOWN_UNKNOWN_2015-05-18  |
| 13204-EMLH_KU296544_SLE_WesternUrban_UNKNOWN_UNKNOWN_2015-06-16  |
| 13275-EMLH_KU296430_SLE_WesternUrban_UNKNOWN_UNKNOWN_2015-06-24  |
| 14521-EMLK_KU296755_SLE_WesternUrban_UNKNOWN_UNKNOWN_2015-02-13  |
| 14687-EMLK_KU296443_SLE_WesternUrban_UNKNOWN_UNKNOWN_2015-02-21  |
| 14782-EMLK_KU296639_SLE_Kambia_UNKNOWN_UNKNOWN_2015-04-23        |
| 14830-EMLK_KU296345_SLE_Kambia_UNKNOWN_UNKNOWN_2015-04-27        |
| 14888-EMLK_KU296423_SLE_Kambia_UNKNOWN_UNKNOWN_2015-05-03        |
| 15070R-DML_SLE_WesternUrban_UNKNOWN_UNKNOWN_2015-08-06           |
| 18596-EMLH_KU296715_SLE_WesternUrban_UNKNOWN_UNKNOWN_2015-07-05  |
| 18638R-EMLH_KU296348_SLE_WesternUrban_UNKNOWN_UNKNOWN_2015-07-08 |
| 18642R-EMLH_KU296357_SLE_WesternUrban_UNKNOWN_UNKNOWN_2015-07-08 |
| 18647-EMLH_KU296566_SLE_WesternUrban_UNKNOWN_UNKNOWN_2015-07-09  |
| 18648-EMLH_KU296701_SLE_WesternUrban_UNKNOWN_UNKNOWN_2015-07-09  |
| 18649-EMLH_KU296456_SLE_WesternUrban_UNKNOWN_UNKNOWN_2015-07-10  |
| 18650-EMLH_KU296370_SLE_WesternUrban_UNKNOWN_UNKNOWN_2015-07-10  |
| 18659R-EMLH_KU296585_SLE_WesternUrban_UNKNOWN_UNKNOWN_2015-07-10 |
| 18660-EMLH_KU296838_SLE_WesternUrban_UNKNOWN_UNKNOWN_2015-07-10  |
| 18687R-EMLH_KU296650_SLE_WesternUrban_UNKNOWN_UNKNOWN_2015-07-12 |
| 20140395_KR653279_SLE_Kono_UNKNOWN_UNKNOWN_2014-09-02            |
| 20141123_KR653291_SLE_Bo_UNKNOWN_UNKNOWN_2014-09-22              |
| 20141280_KR653276_SLE_Kambia_UNKNOWN_UNKNOWN_2014-09-23          |
| 20141582_KR653230_SLE_Bo_UNKNOWN_UNKNOWN_2014-10-04              |
| 20141650_KR653225_SLE_Kenema_UNKNOWN_UNKNOWN_2014-10-05          |
| 20143031_KR653275_SLE_WesternUrban_UNKNOWN_UNKNOWN_2014-10-25    |

|                                                                 |
|-----------------------------------------------------------------|
| 20143187_KR653298_SLE_Pujehun_UNKNOWN_UNKNOWN_2014-10-28        |
| 20143716_KR653292_SLE_Moyamba_UNKNOWN_UNKNOWN_2014-11-04        |
| 20143753_KR653236_SLE_Tonkolili_UNKNOWN_UNKNOWN_2014-11-05      |
| 20143796_KR653257_SLE_Moyamba_UNKNOWN_UNKNOWN_2014-11-05        |
| 20144610_KR653270_SLE_Tonkolili_UNKNOWN_UNKNOWN_2014-11-12      |
| 20145853_KR653290_SLE_Pujehun_UNKNOWN_UNKNOWN_2014-11-26        |
| 389-EMLH_KU296593_SLE_WesternRural_UNKNOWN_UNKNOWN_2015-01-23   |
| 402-EMLH_KU296495_SLE_WesternRural_UNKNOWN_UNKNOWN_2015-01-23   |
| 443-EMLH_KU296539_SLE_WesternUrban_UNKNOWN_UNKNOWN_2015-01-26   |
| 489-EMLH_KU296324_SLE_WesternRural_UNKNOWN_UNKNOWN_2015-01-30   |
| 511-EMLH_KU296646_SLE_WesternUrban_UNKNOWN_UNKNOWN_2015-02-01   |
| 614-EMLH_KU296597_SLE_WesternRural_UNKNOWN_UNKNOWN_2015-02-05   |
| 632-EMLH_KU296693_SLE_WesternUrban_UNKNOWN_UNKNOWN_2015-02-06   |
| 634-EMLH_KU296799_SLE_WesternUrban_UNKNOWN_UNKNOWN_2015-02-06   |
| 731-EMLH_KU296765_SLE_WesternUrban_UNKNOWN_UNKNOWN_2015-02-11   |
| 741-EMLH_KU296295_SLE_WesternUrban_UNKNOWN_UNKNOWN_2015-02-11   |
| 75722-EMLH_KU296791_SLE_WesternRural_UNKNOWN_UNKNOWN_2015-01-15 |
| 75779-EMLH_KU296407_SLE_WesternUrban_UNKNOWN_UNKNOWN_2015-01-19 |
| 77573-EMLK_KU296516_SLE_WesternUrban_UNKNOWN_UNKNOWN_2015-01-03 |
| 77580-EMLK_KU296431_SLE_WesternUrban_UNKNOWN_UNKNOWN_2015-01-03 |
| 77589-EMLK_KU296403_SLE_WesternUrban_UNKNOWN_UNKNOWN_2015-01-04 |
| 77612-EMLK_KU296636_SLE_WesternUrban_UNKNOWN_UNKNOWN_2015-01-05 |
| 77613-EMLK_KU296579_SLE_WesternUrban_UNKNOWN_UNKNOWN_2015-01-05 |
| 77615-EMLK_KU296706_SLE_WesternUrban_UNKNOWN_UNKNOWN_2015-01-05 |
| 77630-EMLK_KU296779_SLE_WesternUrban_UNKNOWN_UNKNOWN_2015-01-06 |
| 77632-EMLK_KU296710_SLE_WesternUrban_UNKNOWN_UNKNOWN_2015-01-06 |
| 77643-EMLK_KU296395_SLE_WesternUrban_UNKNOWN_UNKNOWN_2015-01-07 |
| 77644-EMLK_KU296312_SLE_WesternUrban_UNKNOWN_UNKNOWN_2015-01-07 |
| 77648-EMLK_KU296620_SLE_WesternUrban_UNKNOWN_UNKNOWN_2015-01-07 |
| 77649-EMLK_KU296380_SLE_WesternUrban_UNKNOWN_UNKNOWN_2015-01-07 |
| 77710-EMLK_KU296696_SLE_WesternUrban_UNKNOWN_UNKNOWN_2015-01-10 |
| 77711-EMLK_KU296644_SLE_WesternUrban_UNKNOWN_UNKNOWN_2015-01-10 |
| 77712-EMLK_KU296400_SLE_WesternUrban_UNKNOWN_UNKNOWN_2015-01-10 |
| 77716-EMLK_KU296569_SLE_WesternUrban_UNKNOWN_UNKNOWN_2015-01-10 |
| DML12033_KT357813_SLE_WesternUrban_UNKNOWN_UNKNOWN_2015-02-19   |
| DML12051_KT357814_SLE_WesternUrban_UNKNOWN_UNKNOWN_2015-02-21   |
| DML12116_KT357815_SLE_WesternUrban_UNKNOWN_UNKNOWN_2015-02-26   |
| DML12117_KT357816_SLE_WesternUrban_UNKNOWN_UNKNOWN_2015-02-26   |
| DML12120_KT357817_SLE_WesternUrban_UNKNOWN_UNKNOWN_2015-02-27   |
| DML12137_KT357819_SLE_WesternUrban_UNKNOWN_UNKNOWN_2015-02-28   |
| DML12194_KT357818_SLE_WesternUrban_UNKNOWN_UNKNOWN_2015-03-04   |
| DML12239_KT357820_SLE_WesternUrban_UNKNOWN_UNKNOWN_2015-03-09   |
| DML12260_KT357821_SLE_WesternUrban_UNKNOWN_UNKNOWN_2015-03-09   |
| DML12268_KT357822_SLE_WesternUrban_UNKNOWN_UNKNOWN_2015-03-10   |
| DML12485_KT357824_SLE_WesternUrban_UNKNOWN_UNKNOWN_2015-03-31   |

|                                                                |
|----------------------------------------------------------------|
| DML14077_KT357860_SLE_WesternUrban_UNKNOWN_UNKNOWN_2015-06-30  |
| DML14163_KT357858_SLE_WesternUrban_UNKNOWN_UNKNOWN_2015-07-03  |
| DML14366_KT357859_SLE_WesternUrban_UNKNOWN_UNKNOWN_2015-07-11  |
| DML25180_KT357855_SLE_Kono_UNKNOWN_UNKNOWN_2015-02-23          |
| DML25344_KT357856_SLE_Kono_UNKNOWN_UNKNOWN_2015-03-06          |
| G5112_KR105298_SLE_Kenema_UNKNOWN_UNKNOWN_2014-08-19           |
| G5114_KR105299_SLE_Pujehun_UNKNOWN_UNKNOWN_2014-08-18          |
| G5119_KR105300_SLE_Kenema_UNKNOWN_UNKNOWN_2014-08-24           |
| G5529_KR105309_SLE_Kono_UNKNOWN_UNKNOWN_2014-09-05             |
| G5684_KR105316_SLE_Kenema_UNKNOWN_UNKNOWN_2014-09-13           |
| G5685_KR105317_SLE_Kenema_UNKNOWN_UNKNOWN_2014-09-13           |
| G5743_KR105323_SLE_Kono_UNKNOWN_UNKNOWN_2014-09-17             |
| G5898_KR105331_SLE_Bo_UNKNOWN_UNKNOWN_2014-09-22               |
| Goderich1_KT345616_SLE_WesternUrban_UNKNOWN_UNKNOWN_2015-02-19 |
| J0004_KP759668_SLE_WesternRural_UNKNOWN_UNKNOWN_2014-09-28     |
| J0006_KP759630_SLE_WesternRural_UNKNOWN_UNKNOWN_2014-09-28     |
| J0026_KP759670_SLE_Bombali_UNKNOWN_UNKNOWN_2014-10-02          |
| J0044_KP759713_SLE_WesternRural_UNKNOWN_UNKNOWN_2014-10-05     |
| J0045_KP759714_SLE_WesternUrban_UNKNOWN_UNKNOWN_2014-10-05     |
| J0047_KP759632_SLE_WesternUrban_UNKNOWN_UNKNOWN_2014-10-05     |
| J0052_KP759720_SLE_WesternUrban_UNKNOWN_UNKNOWN_2014-10-08     |
| J0059_KP759725_SLE_WesternRural_UNKNOWN_UNKNOWN_2014-10-08     |
| J0060_KP759726_SLE_WesternUrban_UNKNOWN_UNKNOWN_2014-10-06     |
| J0064_KP759728_SLE_WesternUrban_UNKNOWN_UNKNOWN_2014-10-09     |
| J0065_KP759729_SLE_WesternRural_UNKNOWN_UNKNOWN_2014-10-09     |
| J0068_KP759732_SLE_WesternRural_UNKNOWN_UNKNOWN_2014-10-09     |
| J0069_KP759733_SLE_WesternRural_UNKNOWN_UNKNOWN_2014-10-09     |
| J0075_KP759743_SLE_WesternRural_UNKNOWN_UNKNOWN_2014-10-17     |
| J0077_KP759745_SLE_WesternRural_UNKNOWN_UNKNOWN_2014-10-17     |
| J0078_KP759746_SLE_WesternUrban_UNKNOWN_UNKNOWN_2014-10-18     |
| J0080_KP759749_SLE_PortLoko_UNKNOWN_UNKNOWN_2014-10-18         |
| J0081_KP759750_SLE_WesternRural_UNKNOWN_UNKNOWN_2014-10-16     |
| J0086_KP759646_SLE_WesternRural_UNKNOWN_UNKNOWN_2014-10-23     |
| J0087_KP759647_SLE_PortLoko_UNKNOWN_UNKNOWN_2014-10-23         |
| J0090_KP759649_SLE_WesternUrban_UNKNOWN_UNKNOWN_2014-10-23     |
| J0093_KP759760_SLE_WesternRural_UNKNOWN_UNKNOWN_2014-10-24     |
| J0094_KP759761_SLE_WesternRural_UNKNOWN_UNKNOWN_2014-10-27     |
| J0098_KP759763_SLE_WesternRural_UNKNOWN_UNKNOWN_2014-10-28     |
| J0100_KP759655_SLE_Kambia_UNKNOWN_UNKNOWN_2014-10-26           |
| J0106_KP759767_SLE_WesternRural_UNKNOWN_UNKNOWN_2014-10-28     |
| J0107_KP759768_SLE_WesternUrban_UNKNOWN_UNKNOWN_2014-10-29     |
| J0108_KP759659_SLE_WesternRural_UNKNOWN_UNKNOWN_2014-10-28     |
| J0116_KP759664_SLE_WesternRural_UNKNOWN_UNKNOWN_2014-10-30     |
| J0117_KP759665_SLE_WesternRural_UNKNOWN_UNKNOWN_2014-10-31     |
| J0129_KP759600_SLE_WesternUrban_UNKNOWN_UNKNOWN_2014-11-02     |

|                                                             |
|-------------------------------------------------------------|
| J0132_KP759601_SLE_WesternUrban_UNKNOWN_UNKNOWN_2014-11-02  |
| J0133_KP759681_SLE_WesternRural_UNKNOWN_UNKNOWN_2014-10-31  |
| J0136_KP759684_SLE_WesternRural_UNKNOWN_UNKNOWN_2014-11-01  |
| J0148_KP759612_SLE_WesternRural_UNKNOWN_UNKNOWN_2014-11-06  |
| J0151_KP759613_SLE_WesternRural_UNKNOWN_UNKNOWN_2014-11-07  |
| J0153_KP759616_SLE_WesternRural_UNKNOWN_UNKNOWN_2014-11-07  |
| J0167_KP759624_SLE_WesternUrban_UNKNOWN_UNKNOWN_2014-11-08  |
| J0169_KP759706_SLE_WesternUrban_UNKNOWN_UNKNOWN_2014-11-09  |
| J0170_KP759625_SLE_WesternUrban_UNKNOWN_UNKNOWN_2014-11-10  |
| J0172_KP759626_SLE_WesternRural_UNKNOWN_UNKNOWN_2014-11-11  |
| KT2317_KU296735_SLE_PortLoko_UNKNOWN_UNKNOWN_2014-12-02     |
| KT2321_KU296762_SLE_PortLoko_UNKNOWN_UNKNOWN_2014-12-02     |
| KT4631_KU296607_SLE_WesternUrban_UNKNOWN_UNKNOWN_2015-02-02 |
| KT4677_KU296608_SLE_WesternRural_UNKNOWN_UNKNOWN_2015-02-03 |
| KT4695_KU296549_SLE_WesternRural_UNKNOWN_UNKNOWN_2015-02-04 |
| KT4935_KU296467_SLE_WesternRural_UNKNOWN_UNKNOWN_2015-02-11 |
| KT5233_KU296750_SLE_WesternRural_UNKNOWN_UNKNOWN_2015-02-21 |
| KT5249_KU296601_SLE_WesternUrban_UNKNOWN_UNKNOWN_2015-02-22 |
| KT5382_KU296657_SLE_WesternRural_UNKNOWN_UNKNOWN_2015-02-25 |
| KT5787_KU296711_SLE_WesternUrban_UNKNOWN_UNKNOWN_2015-03-07 |
| KT5789_KU296713_SLE_WesternUrban_UNKNOWN_UNKNOWN_2015-03-07 |
| MK10128_KU296502_SLE_Tonkolili_UNKNOWN_UNKNOWN_2015-07-31   |
| MK10173_KU296313_SLE_Tonkolili_UNKNOWN_UNKNOWN_2015-08-01   |
| MK2008_KU296526_SLE_WesternUrban_UNKNOWN_UNKNOWN_2015-02-12 |
| MK2255_KU296648_SLE_Bombali_UNKNOWN_UNKNOWN_2015-02-21      |
| MK2282_KU296788_SLE_Bombali_UNKNOWN_UNKNOWN_2015-02-22      |
| MK2283_KU296833_SLE_Bombali_UNKNOWN_UNKNOWN_2015-02-22      |
| MK2334_KU296366_SLE_Bombali_UNKNOWN_UNKNOWN_2015-02-23      |
| MK2341_KU296494_SLE_Bombali_UNKNOWN_UNKNOWN_2015-02-24      |
| MK2342_KU296347_SLE_Bombali_UNKNOWN_UNKNOWN_2015-02-24      |
| MK2343_KU296640_SLE_Bombali_UNKNOWN_UNKNOWN_2015-02-24      |
| MK2344_KU296586_SLE_Bombali_UNKNOWN_UNKNOWN_2015-02-24      |
| MK2362_KU296842_SLE_Bombali_UNKNOWN_UNKNOWN_2015-02-24      |
| MK2364_KU296719_SLE_Bombali_UNKNOWN_UNKNOWN_2015-02-24      |
| MK2365_KU296363_SLE_Bombali_UNKNOWN_UNKNOWN_2015-02-25      |
| MK2366_KU296810_SLE_Bombali_UNKNOWN_UNKNOWN_2015-02-25      |
| MK2367_KU296652_SLE_Bombali_UNKNOWN_UNKNOWN_2015-02-25      |
| MK2369_KU296832_SLE_Bombali_UNKNOWN_UNKNOWN_2015-02-25      |
| MK2370_KU296760_SLE_Bombali_UNKNOWN_UNKNOWN_2015-02-25      |
| MK2371_KU296397_SLE_Bombali_UNKNOWN_UNKNOWN_2015-02-25      |
| MK2382_KU296686_SLE_Bombali_UNKNOWN_UNKNOWN_2015-02-25      |
| MK2383_KU296583_SLE_Bombali_UNKNOWN_UNKNOWN_2015-02-25      |
| MK2395_KU296336_SLE_Bombali_UNKNOWN_UNKNOWN_2015-02-25      |
| MK2397_KU296444_SLE_Bombali_UNKNOWN_UNKNOWN_2015-02-25      |
| MK2398_KU296578_SLE_Bombali_UNKNOWN_UNKNOWN_2015-02-25      |



|                                                                  |
|------------------------------------------------------------------|
| MK2405_KU296542_SLE_Bombali_UNKNOWN_UNKNOWN_2015-02-25           |
| MK2427_KU296759_SLE_Bombali_UNKNOWN_UNKNOWN_2015-02-25           |
| MK2431_KU296562_SLE_Bombali_UNKNOWN_UNKNOWN_2015-02-25           |
| MK2436_KU296626_SLE_Bombali_UNKNOWN_UNKNOWN_2015-02-26           |
| MK2437_KU296469_SLE_Bombali_UNKNOWN_UNKNOWN_2015-02-26           |
| MK2447_KU296642_SLE_Bombali_UNKNOWN_UNKNOWN_2015-02-26           |
| MK2448_KU296818_SLE_Bombali_UNKNOWN_UNKNOWN_2015-02-26           |
| MK2449_KU296466_SLE_Bombali_UNKNOWN_UNKNOWN_2015-02-26           |
| MK2506_KU296360_SLE_Bombali_UNKNOWN_UNKNOWN_2015-02-27           |
| MK2570_KU296346_SLE_Bombali_UNKNOWN_UNKNOWN_2015-03-01           |
| MK2673_KU296749_SLE_Bombali_UNKNOWN_UNKNOWN_2015-03-03           |
| MK2710_KU296703_SLE_Bombali_UNKNOWN_UNKNOWN_2015-03-05           |
| MK2717_KU296425_SLE_Bombali_UNKNOWN_UNKNOWN_2015-03-04           |
| MK2724_KU296695_SLE_Bombali_UNKNOWN_UNKNOWN_2015-03-05           |
| MK2788_KU296573_SLE_Bombali_UNKNOWN_UNKNOWN_2015-03-07           |
| MK2789_KU296613_SLE_Bombali_UNKNOWN_UNKNOWN_2015-03-07           |
| MK2790_KU296452_SLE_Bombali_UNKNOWN_UNKNOWN_2015-03-07           |
| MK2825_KU296402_SLE_Bombali_UNKNOWN_UNKNOWN_2015-03-08           |
| MK2826_KU296405_SLE_Bombali_UNKNOWN_UNKNOWN_2015-03-08           |
| MK2850_KU296374_SLE_Bombali_UNKNOWN_UNKNOWN_2015-03-09           |
| MK2900_KU296787_SLE_Bombali_UNKNOWN_UNKNOWN_2015-03-10           |
| MK2938_KU296771_SLE_Bombali_UNKNOWN_UNKNOWN_2015-03-11           |
| MK2983_KU296393_SLE_Bombali_UNKNOWN_UNKNOWN_2015-03-12           |
| MK3043_KU296474_SLE_Bombali_UNKNOWN_UNKNOWN_2015-03-14           |
| MK3183_KU296800_SLE_Bombali_UNKNOWN_UNKNOWN_2015-03-17           |
| MK3462_KU296565_SLE_Bombali_UNKNOWN_UNKNOWN_2015-03-26           |
| MK3479_KU296483_SLE_Bombali_UNKNOWN_UNKNOWN_2015-03-26           |
| MK8878_KU296684_SLE_Tonkolili_UNKNOWN_UNKNOWN_2015-07-23         |
| MK9396_KU296321_SLE_WesternUrban_UNKNOWN_UNKNOWN_2015-07-18      |
| NICD0019_XXXX_SLE_WesternRural_UNKNOWN_UNKNOWN_2014-08-26        |
| NICD1526_XXXX_SLE_WesternRural_UNKNOWN_UNKNOWN_2014-10-01        |
| NICD1972-Vero_XXXX_SLE_WesternUrban_Kissy_EastIII_2014-10-09     |
| NICD2118_XXXX_SLE_WesternUrban_Aberdeen_WestIII_2014-10-11       |
| NICD2540-Vero_XXXX_SLE_WesternUrban_AllenTown_EastIII_2014-10-22 |
| NICD2542_XXXX_SLE_WesternUrban_AllenTown_EastIII_2014-10-22      |
| NICD2749_XXXX_SLE_Kambia_UNKNOWN_UNKNOWN_2014-11-06              |
| NICD3465-swab_XXXX_SLE_WesternUrban_AllenTown_EastIII_2014-11-18 |
| NICD3666_XXXX_SLE_WesternRural_UNKNOWN_UNKNOWN_2014-11-22        |
| NICD3687-Vero_XXXX_SLE_WesternUrban_Magazine_Centrall_2014-11-23 |
| NICD3752_XXXX_SLE_WesternRural_UNKNOWN_UNKNOWN_2014-11-24        |
| NICD3753_XXXX_SLE_WesternRural_UNKNOWN_UNKNOWN_2014-11-24        |
| NICD3824_XXXX_SLE_WesternRural_UNKNOWN_UNKNOWN_2014-11-25        |
| NICD3944_XXXX_SLE_WesternUrban_Wellington_EastIII_2014-11-26     |
| NICD3954_XXXX_SLE_WesternUrban_Wellington_EastIII_2014-11-26     |
| NICD4024-Vero_XXXX_SLE_WesternUrban_Kortright_EastII_2014-11-29  |

|                                                                   |
|-------------------------------------------------------------------|
| NICD4027-Vero_XXXX_SLE_WesternUrban_Kortright_EastII_2014-11-29   |
| NICD4029-Vero_XXXX_SLE_WesternUrban_Kortright_EastII_2014-11-29   |
| NICD4041-Vero_XXXX_SLE_WesternUrban_Lumley_WestIII_2014-11-29     |
| NICD4122_XXXX_SLE_WesternRural_UNKNOWN_UNKNOWN_2014-12-02         |
| NICD4125_XXXX_SLE_WesternUrban_NewEngland_WestII_2014-12-02       |
| NICD4167_XXXX_SLE_WesternUrban_Kortright_EastII_2014-12-02        |
| NICD4325_XXXX_SLE_WesternRural_UNKNOWN_UNKNOWN_2014-12-05         |
| NICD4361-Vero_XXXX_SLE_WesternRural_UNKNOWN_UNKNOWN_2014-12-06    |
| NICD4430_XXXX_SLE_WesternUrban_Magazine_CentralI_2014-12-06       |
| NICD4674_XXXX_SLE_WesternRural_UNKNOWN_UNKNOWN_2014-12-12         |
| NICD4693_XXXX_SLE_WesternUrban_Wellington_EastIII_2014-12-10      |
| NICD4735_XXXX_SLE_WesternUrban_Freetown_WestII_2014-12-13         |
| NICD4823_XXXX_SLE_WesternUrban_Magazine_CentralI_2014-12-15       |
| NICD4877_XXXX_SLE_WesternUrban_CongoTown_WestI_2014-12-16         |
| NICD4932-Vero_XXXX_SLE_WesternUrban_FoulahTown_EastII_2014-12-17  |
| NICD4975_XXXX_SLE_WesternUrban_Magazine_CentralI_2014-12-18       |
| NICD5071_XXXX_SLE_WesternUrban_Magazine_CentralI_2014-12-20       |
| NICD5386_XXXX_SLE_WesternUrban_Freetown_WestII_2014-12-29         |
| NICD5388_XXXX_SLE_WesternUrban_NewEngland_WestII_2014-12-29       |
| NICD5395_XXXX_SLE_WesternUrban_Kortright_EastII_2014-12-29        |
| NICD5400_XXXX_SLE_WesternUrban_Kortright_EastII_2014-12-28        |
| NICD5647-Vero_XXXX_SLE_WesternUrban_Wellington_EastIII_2015-01-03 |
| NICD5747_XXXX_SLE_WesternUrban_TowerHill_CentralIII_2015-01-08    |
| NICD5819_XXXX_SLE_WesternUrban_Lumley_WestIII_2015-01-09          |
| NICD6195_XXXX_SLE_WesternUrban_CalabaTown_EastIII_2015-01-23      |
| NICD6345_XXXX_SLE_WesternUrban_MountAureol_EastII_2015-01-27      |
| NICD6348_XXXX_SLE_WesternUrban_MountAureol_EastII_2015-01-28      |
| NICD6392-Vero_XXXX_SLE_WesternUrban_MountAureol_EastII_2015-01-30 |
| NICD6403_XXXX_SLE_WesternUrban_MountAureol_EastII_2015-01-29      |
| NICD6404_XXXX_SLE_WesternUrban_MountAureol_EastII_2015-01-29      |
| NICD6414_XXXX_SLE_WesternUrban_CongoTown_WestI_2015-01-30         |
| NICD6564_XXXX_SLE_WesternUrban_Aberdeen_WestIII_2015-02-07        |
| NICD6587_XXXX_SLE_WesternUrban_AllenTown_EastIII_2015-02-10       |
| NICD6601_XXXX_SLE_WesternUrban_Freetown_WestII_2015-02-11         |
| NICD6605_XXXX_SLE_WesternUrban_Aberdeen_WestIII_2015-02-11        |
| NICD6640_XXXX_SLE_WesternUrban_Magazine_CentralI_2015-02-13       |
| NICD6643_XXXX_SLE_WesternUrban_Freetown_WestII_2015-02-13         |
| NICD6644_XXXX_SLE_WesternUrban_Freetown_WestII_2015-02-13         |
| NICD6672_XXXX_SLE_WesternUrban_MountAureol_EastII_2015-02-14      |
| NICD7034_XXXX_SLE_WesternUrban_Aberdeen_WestIII_2015-03-06        |
| NICD7036_XXXX_SLE_WesternUrban_Aberdeen_WestIII_2015-03-07        |
| PL2101_KU296714_SLE_PortLoko_UNKNOWN_UNKNOWN_2015-01-18           |
| PL2668_KU296294_SLE_PortLoko_UNKNOWN_UNKNOWN_2015-01-29           |
| PL3984_KU296330_SLE_PortLoko_UNKNOWN_UNKNOWN_2015-02-25           |
| PL4059_KU296485_SLE_PortLoko_UNKNOWN_UNKNOWN_2015-02-26           |

|                                                                 |
|-----------------------------------------------------------------|
| PL4105_KU296694_SLE_PortLoko_UNKNOWN_UNKNOWN_2015-02-28         |
| PL4187_KU296567_SLE_PortLoko_UNKNOWN_UNKNOWN_2015-03-01         |
| PL4190_KU296351_SLE_PortLoko_UNKNOWN_UNKNOWN_2015-03-01         |
| PL4194_KU296501_SLE_PortLoko_UNKNOWN_UNKNOWN_2015-03-02         |
| PL4292_KU296827_SLE_Kambia_UNKNOWN_UNKNOWN_2015-03-03           |
| PL4346_KU296641_SLE_Kambia_UNKNOWN_UNKNOWN_2015-03-04           |
| PL4569_KU296598_SLE_PortLoko_UNKNOWN_UNKNOWN_2015-03-10         |
| PL4570_KU296451_SLE_PortLoko_UNKNOWN_UNKNOWN_2015-03-10         |
| PL4651_KU296841_SLE_PortLoko_UNKNOWN_UNKNOWN_2015-03-12         |
| PL4671_KU296782_SLE_PortLoko_UNKNOWN_UNKNOWN_2015-03-12         |
| PL4696_KU296513_SLE_PortLoko_UNKNOWN_UNKNOWN_2015-03-13         |
| PL5001_KU296514_SLE_PortLoko_UNKNOWN_UNKNOWN_2015-03-19         |
| PL5019_KU296627_SLE_PortLoko_UNKNOWN_UNKNOWN_2015-03-19         |
| PL5099_KU296682_SLE_PortLoko_UNKNOWN_UNKNOWN_2015-03-19         |
| PL5179_KU296638_SLE_PortLoko_UNKNOWN_UNKNOWN_2015-03-22         |
| PL5202_KU296396_SLE_PortLoko_UNKNOWN_UNKNOWN_2015-03-23         |
| PL5228_KU296535_SLE_PortLoko_UNKNOWN_UNKNOWN_2015-03-23         |
| PL5868_KU296550_SLE_Kambia_UNKNOWN_UNKNOWN_2015-04-06           |
| PL6086_KU296651_SLE_Kambia_UNKNOWN_UNKNOWN_2015-04-12           |
|                                                                 |
| <b>SL3.2.5</b>                                                  |
| 12615-EMLH_KU296521_SLE_WesternRural_UNKNOWN_UNKNOWN_2015-03-22 |
| 12705-EMLH_KU296490_SLE_WesternUrban_UNKNOWN_UNKNOWN_2015-03-29 |
| 20140024_KR653252_SLE_PortLoko_UNKNOWN_UNKNOWN_2014-08-20       |
| 20141271_KR653261_SLE_PortLoko_UNKNOWN_UNKNOWN_2014-09-24       |
| 20141429_KR653260_SLE_Kono_UNKNOWN_UNKNOWN_2014-09-28           |
| 20142551_KR653226_SLE_Koinadugu_UNKNOWN_UNKNOWN_2014-10-23      |
| 20142895_KR653268_SLE_Koinadugu_UNKNOWN_UNKNOWN_2014-10-24      |
| 20143018_KR653272_SLE_WesternUrban_UNKNOWN_UNKNOWN_2014-10-26   |
| 20143360_KR653258_SLE_Kenema_UNKNOWN_UNKNOWN_2014-10-30         |
| 20143415_KR653248_SLE_WesternRural_UNKNOWN_UNKNOWN_2014-10-31   |
| 20143550_KR653228_SLE_Bombali_UNKNOWN_UNKNOWN_2014-11-01        |
| 20143648_KR653253_SLE_Koinadugu_UNKNOWN_UNKNOWN_2014-11-03      |
| 20143659_KR653256_SLE_Koinadugu_UNKNOWN_UNKNOWN_2014-11-03      |
| 20143918_KR653240_SLE_WesternRural_UNKNOWN_UNKNOWN_2014-11-06   |
| 20143938_KR653264_SLE_Koinadugu_UNKNOWN_UNKNOWN_2014-11-07      |
| 20144819_KR653299_SLE_Moyamba_UNKNOWN_UNKNOWN_2014-11-15        |
| 20144820_KR653243_SLE_Moyamba_UNKNOWN_UNKNOWN_2014-11-15        |
| 20146578_KR653281_SLE_Koinadugu_UNKNOWN_UNKNOWN_2014-12-26      |
| 75711-EMLH_KU296596_SLE_WesternUrban_UNKNOWN_UNKNOWN_2015-01-15 |
| 77585-EMLK_KU296734_SLE_WesternUrban_UNKNOWN_UNKNOWN_2015-01-04 |
| DML12458_KT357823_SLE_WesternUrban_UNKNOWN_UNKNOWN_2015-03-28   |
| G5019_KR105294_SLE_Kenema_UNKNOWN_UNKNOWN_2014-08-16            |
| G6089_KR105345_SLE_Tonkolili_UNKNOWN_UNKNOWN_2014-09-27         |
| G6091_KR105346_SLE_Tonkolili_UNKNOWN_UNKNOWN_2014-09-27         |

|                                                            |
|------------------------------------------------------------|
| G6095_KR105347_SLE_Tonkolili_UNKNOWN_UNKNOWN_2014-09-27    |
| J0009_KP759734_SLE_PortLoko_UNKNOWN_UNKNOWN_2014-09-28     |
| J0010_KP759639_SLE_PortLoko_UNKNOWN_UNKNOWN_2014-09-28     |
| J0023_KP759652_SLE_WesternRural_UNKNOWN_UNKNOWN_2014-10-01 |
| J0025_KP759666_SLE_WesternRural_UNKNOWN_UNKNOWN_2014-10-02 |
| J0027_KP759678_SLE_Bombali_UNKNOWN_UNKNOWN_2014-10-02      |
| J0031_KP759607_SLE_PortLoko_UNKNOWN_UNKNOWN_2014-10-03     |
| J0033_KP759692_SLE_PortLoko_UNKNOWN_UNKNOWN_2014-10-03     |
| J0034_KP759608_SLE_PortLoko_UNKNOWN_UNKNOWN_2014-09-30     |
| J0035_KP759609_SLE_PortLoko_UNKNOWN_UNKNOWN_2014-10-01     |
| J0036_KP759694_SLE_PortLoko_UNKNOWN_UNKNOWN_2014-10-03     |
| J0037_KP759615_SLE_PortLoko_UNKNOWN_UNKNOWN_2014-10-03     |
| J0046_KP759715_SLE_WesternRural_UNKNOWN_UNKNOWN_2014-10-07 |
| J0055_KP759723_SLE_PortLoko_UNKNOWN_UNKNOWN_2014-10-06     |
| J0056_KP759634_SLE_PortLoko_UNKNOWN_UNKNOWN_2014-10-08     |
| J0057_KP759635_SLE_PortLoko_UNKNOWN_UNKNOWN_2014-10-05     |
| J0058_KP759724_SLE_PortLoko_UNKNOWN_UNKNOWN_2014-10-08     |
| J0062_KP759727_SLE_PortLoko_UNKNOWN_UNKNOWN_2014-10-10     |
| J0063_KP759638_SLE_PortLoko_UNKNOWN_UNKNOWN_2014-10-10     |
| J0067_KP759731_SLE_PortLoko_UNKNOWN_UNKNOWN_2014-10-09     |
| J0070_KP759735_SLE_PortLoko_UNKNOWN_UNKNOWN_2014-10-09     |
| J0071_KP759736_SLE_PortLoko_UNKNOWN_UNKNOWN_2014-10-09     |
| J0072_KP759737_SLE_PortLoko_UNKNOWN_UNKNOWN_2014-10-09     |
| J0076_KP759744_SLE_WesternRural_UNKNOWN_UNKNOWN_2014-10-17 |
| J0082_KP759751_SLE_WesternRural_UNKNOWN_UNKNOWN_2014-10-16 |
| J0083_KP759752_SLE_PortLoko_UNKNOWN_UNKNOWN_2014-10-18     |
| J0084_KP759753_SLE_PortLoko_UNKNOWN_UNKNOWN_2014-10-16     |
| J0095_KP759653_SLE_WesternUrban_UNKNOWN_UNKNOWN_2014-10-27 |
| J0097_KP759762_SLE_WesternRural_UNKNOWN_UNKNOWN_2014-10-28 |
| J0109_KP759594_SLE_WesternUrban_UNKNOWN_UNKNOWN_2014-10-31 |
| J0110_KP759660_SLE_WesternUrban_UNKNOWN_UNKNOWN_2014-10-31 |
| J0111_KP759595_SLE_WesternUrban_UNKNOWN_UNKNOWN_2014-10-30 |
| J0119_KP759667_SLE_WesternUrban_UNKNOWN_UNKNOWN_2014-10-30 |
| J0120_KP759599_SLE_WesternRural_UNKNOWN_UNKNOWN_2014-10-30 |
| J0122_KP759671_SLE_WesternUrban_UNKNOWN_UNKNOWN_2014-10-29 |
| J0125_KP759674_SLE_WesternRural_UNKNOWN_UNKNOWN_2014-10-31 |
| J0126_KP759675_SLE_WesternRural_UNKNOWN_UNKNOWN_2014-10-31 |
| J0127_KP759676_SLE_WesternUrban_UNKNOWN_UNKNOWN_2014-10-30 |
| J0128_KP759677_SLE_WesternUrban_UNKNOWN_UNKNOWN_2014-10-31 |
| J0130_KP759679_SLE_PortLoko_UNKNOWN_UNKNOWN_2014-11-02     |
| J0131_KP759680_SLE_PortLoko_UNKNOWN_UNKNOWN_2014-10-30     |
| J0138_KP759686_SLE_WesternUrban_UNKNOWN_UNKNOWN_2014-11-01 |
| J0139_KP759687_SLE_WesternUrban_UNKNOWN_UNKNOWN_2014-10-30 |
| J0145_KP759693_SLE_WesternRural_UNKNOWN_UNKNOWN_2014-11-06 |
| J0158_KP759700_SLE_WesternRural_UNKNOWN_UNKNOWN_2014-11-08 |

|                                                             |
|-------------------------------------------------------------|
| J0161_KP759701_SLE_WesternUrban_UNKNOWN_UNKNOWN_2014-11-08  |
| J0166_KP759704_SLE_WesternUrban_UNKNOWN_UNKNOWN_2014-11-08  |
| KT5320_KU296809_SLE_WesternRural_UNKNOWN_UNKNOWN_2015-02-24 |
| KT5388_KU296355_SLE_WesternRural_UNKNOWN_UNKNOWN_2015-02-25 |
| KT5734_KU296595_SLE_WesternRural_UNKNOWN_UNKNOWN_2015-03-06 |
| MK0020_KU296551_SLE_Bombali_UNKNOWN_UNKNOWN_2014-12-08      |
| MK0592_KU296814_SLE_Bombali_UNKNOWN_UNKNOWN_2014-12-28      |
| MK0704_KU296663_SLE_Bombali_UNKNOWN_UNKNOWN_2014-12-31      |
| MK0725_KU296629_SLE_Bombali_UNKNOWN_UNKNOWN_2015-01-01      |
| MK0879_KU296410_SLE_PortLoko_UNKNOWN_UNKNOWN_2015-01-05     |
| MK0894_KU296356_SLE_Bombali_UNKNOWN_UNKNOWN_2015-01-06      |
| MK1156_KU296605_SLE_Bombali_UNKNOWN_UNKNOWN_2015-01-15      |
| MK13013_KU296454_SLE_Bombali_UNKNOWN_UNKNOWN_2015-09-12     |
| MK2656_KU296577_SLE_Koinadugu_UNKNOWN_UNKNOWN_2015-03-03    |
| MK2918_KU296300_SLE_Koinadugu_UNKNOWN_UNKNOWN_2015-03-10    |
| MK3050_KU296445_SLE_Koinadugu_UNKNOWN_UNKNOWN_2015-03-14    |
| NICD0086_XXXX_SLE_Bombali_UNKNOWN_UNKNOWN_2014-08-29        |
| NICD0129_XXXX_SLE_Bombali_UNKNOWN_UNKNOWN_2014-08-31        |
| NICD0188_XXXX_SLE_Bombali_UNKNOWN_UNKNOWN_2014-09-03        |
| NICD0190_XXXX_SLE_Bombali_UNKNOWN_UNKNOWN_2014-09-03        |
| NICD0193_XXXX_SLE_Bombali_UNKNOWN_UNKNOWN_2014-09-03        |
| NICD0234_XXXX_SLE_PortLoko_UNKNOWN_UNKNOWN_2014-09-04       |
| NICD0235_XXXX_SLE_PortLoko_UNKNOWN_UNKNOWN_2014-09-04       |
| NICD0256_XXXX_SLE_Bombali_UNKNOWN_UNKNOWN_2014-09-04        |
| NICD0257_XXXX_SLE_Bombali_UNKNOWN_UNKNOWN_2014-09-05        |
| NICD0264_XXXX_SLE_Bombali_UNKNOWN_UNKNOWN_2014-09-05        |
| NICD0299_XXXX_SLE_PortLoko_UNKNOWN_UNKNOWN_2014-09-05       |
| NICD0369_XXXX_SLE_Bombali_UNKNOWN_UNKNOWN_2014-09-07        |
| NICD0637_XXXX_SLE_Tonkolili_UNKNOWN_UNKNOWN_2014-09-16      |
| NICD0650_XXXX_SLE_Bombali_UNKNOWN_UNKNOWN_2014-09-15        |
| NICD0782_XXXX_SLE_Bombali_UNKNOWN_UNKNOWN_2014-09-17        |
| NICD0919_XXXX_SLE_Tonkolili_UNKNOWN_UNKNOWN_2014-09-19      |
| NICD1016_XXXX_SLE_PortLoko_UNKNOWN_UNKNOWN_2014-09-21       |
| NICD1079_XXXX_SLE_Bombali_UNKNOWN_UNKNOWN_2014-09-20        |
| NICD1089-Vero_XXXX_SLE_Bombali_UNKNOWN_UNKNOWN_2014-09-20   |
| NICD1100_XXXX_SLE_Bombali_UNKNOWN_UNKNOWN_2014-09-21        |
| NICD1147_XXXX_SLE_PortLoko_UNKNOWN_UNKNOWN_2014-09-22       |
| NICD1148_XXXX_SLE_PortLoko_UNKNOWN_UNKNOWN_2014-09-22       |
| NICD1156_XXXX_SLE_PortLoko_UNKNOWN_UNKNOWN_2014-09-22       |
| NICD1167_XXXX_SLE_PortLoko_UNKNOWN_UNKNOWN_2014-09-22       |
| NICD1201_XXXX_SLE_Tonkolili_UNKNOWN_UNKNOWN_2014-09-20      |
| NICD1317_XXXX_SLE_Bombali_UNKNOWN_UNKNOWN_2014-09-24        |
| NICD1422_XXXX_SLE_PortLoko_UNKNOWN_UNKNOWN_2014-09-26       |
| NICD1430_XXXX_SLE_PortLoko_UNKNOWN_UNKNOWN_2014-09-26       |
| NICD1514_XXXX_SLE_PortLoko_UNKNOWN_UNKNOWN_2014-09-28       |

|                                                                  |
|------------------------------------------------------------------|
| NICD1662-Vero_XXXX_SLE_Bombali_UNKNOWN_UNKNOWN_2014-10-01        |
| NICD2219_XXXX_SLE_WesternUrban_AllenTown_EastIII_2014-10-14      |
| NICD2308_XXXX_SLE_WesternRural_UNKNOWN_UNKNOWN_2014-10-16        |
| NICD2310_XXXX_SLE_WesternRural_UNKNOWN_UNKNOWN_2014-10-16        |
| NICD2494_XXXX_SLE_WesternRural_UNKNOWN_UNKNOWN_2014-10-23        |
| NICD2589_XXXX_SLE_WesternRural_UNKNOWN_UNKNOWN_2014-10-24        |
| NICD3304-swab_XXXX_SLE_WesternUrban_Kortright_EastII_2014-11-15  |
| NICD3341_XXXX_SLE_WesternUrban_Magazine_Centrall_2014-11-16      |
| NICD3420_XXXX_SLE_WesternUrban_Kissy_EastIII_2014-11-17          |
| NICD4030-Vero_XXXX_SLE_WesternRural_UNKNOWN_UNKNOWN_2014-11-29   |
| NICD4072-swab_XXXX_SLE_WesternUrban_AllenTown_EastIII_2014-11-30 |
| NICD4113_XXXX_SLE_WesternUrban_Kissy_EastIII_2014-12-01          |
| NICD4329_XXXX_SLE_WesternUrban_FoulahTown_EastII_2014-12-05      |
| NICD4356_XXXX_SLE_WesternUrban_Wilberforce_WestIII_2014-12-06    |
| NICD5291_XXXX_SLE_WesternUrban_Kortright_EastII_2014-12-25       |
| NICD5293_XXXX_SLE_WesternUrban_Magazine_Centrall_2014-12-25      |
| NICD5311_XXXX_SLE_WesternUrban_Freetown_WestII_2014-12-26        |
| NICD5370_XXXX_SLE_WesternRural_UNKNOWN_UNKNOWN_2014-12-28        |
| NICD5421_XXXX_SLE_WesternUrban_Wellington_EastIII_2014-12-30     |
| NICD6823-swab_XXXX_SLE_WesternUrban_AllenTown_EastIII_2015-02-26 |

**Table S4. Summary of the geographical distribution of SLE EVD cases from which sequences were available in the public domain or generated in this study. The percentage coverage of sequences available in relation to total number of laboratory confirmed cases are also provided.**

| <b>Sierra Leone districts</b> | <b>Population size (as of December 2015)†</b> | <b>Total number of laboratory confirmed cases</b> | <b>Number of sequences available Dudas dataset (% of confirmed cases)</b> | <b>Number of sequences NICD data (% of confirmed cases)</b> | <b>New number of sequences available (% of confirmed cases)</b> |
|-------------------------------|-----------------------------------------------|---------------------------------------------------|---------------------------------------------------------------------------|-------------------------------------------------------------|-----------------------------------------------------------------|
| Bo                            | 575478                                        | 358                                               | 13 (3.63%)                                                                | 0                                                           | 13 (3.63%)                                                      |
| Bombali                       | 606544                                        | 1064                                              | 108 (10.15%)                                                              | 29 (2.73%)                                                  | 137 (12.88%)                                                    |
| Bonthe                        | 200781                                        | 1                                                 | 1 (100%)                                                                  | 0                                                           | 1 (100%)                                                        |
| Kailahun                      | 526379                                        | 658                                               | 101 (15.35%)                                                              | 0                                                           | 101 (15.35%)                                                    |
| Kambia                        | 345474                                        | 277                                               | 74 (26.71%)                                                               | 2 (0.72%)                                                   | 76 (27.44%)                                                     |
| Kenema                        | 609891                                        | 532                                               | 75 (14.1%)                                                                | 0                                                           | 75 (14.1%)                                                      |
| Koinadugu                     | 409372                                        | 155                                               | 11 (7.1%)                                                                 | 0                                                           | 11 (7.1%)                                                       |
| Kono                          | 506100                                        | 450                                               | 38 (8.44%)                                                                | 0                                                           | 38 (8.44%)                                                      |
| Moyamba                       | 318588                                        | 276                                               | 23 (8.33%)                                                                | 1 (0.36%)                                                   | 24 (8.7%)                                                       |
| Port Loko                     | 615376                                        | 1609                                              | 149 (9.26%)                                                               | 33 (2.05%)                                                  | 182 (11.31%)                                                    |
| Pujehun                       | 346461                                        | 54                                                | 9 (16.67%)                                                                | 0                                                           | 9 (16.67%)                                                      |
| Tonkolili                     | 531435                                        | 505                                               | 19 (3.76%)                                                                | 10 (1.98%)                                                  | 29 (5.74%)                                                      |
| Western Area Rural            | 444270                                        | 1381                                              | 88 (6.37%)                                                                | 34 (2.46%)                                                  | 122 (8.83%)                                                     |
| Western Area Urban            | 1055964                                       | 2520                                              | 152 (6.03%)                                                               | 109 (4.33%)                                                 | 261 (10.36%)                                                    |
| <b>Total</b>                  | <b>7092113</b>                                | <b>9840</b>                                       | <b>861* (8.75%)</b>                                                       | <b>218 (2.22%)</b>                                          | <b>1079* (10.97%)</b>                                           |

† <https://www.citypopulation.de/php/sierraleone-admin.php>

\* A total of 167 sequences from the Dudas dataset did not have complete information on district of origin.

**Table S5. Temporal distribution of sequence numbers from the Western Area for the period August 2014 to March 2015**

| Month          | Number of laboratory confirmed cases in Western Area Rural | Number of sequences available from Western Area Rural Dudas dataset (% of confirmed cases) | Number of sequences from Western Area Rural NICD data (% of confirmed cases) | New number of sequences available from Western Area Rural (% of confirmed cases) | Number of laboratory confirmed cases in Western Area Urban | Number of sequences available from Western Area Urban Dudas dataset (% of confirmed cases) | Number of sequences from Western Area Urban NICD data (% of confirmed cases) | New number of sequences available from Western Area Urban (% of confirmed cases) |
|----------------|------------------------------------------------------------|--------------------------------------------------------------------------------------------|------------------------------------------------------------------------------|----------------------------------------------------------------------------------|------------------------------------------------------------|--------------------------------------------------------------------------------------------|------------------------------------------------------------------------------|----------------------------------------------------------------------------------|
| August 2014    | 47                                                         | 1 (2.13%)                                                                                  | 3 (6.38%)                                                                    | <b>4 (8.51%)</b>                                                                 | 61                                                         | 1 (1.64%)                                                                                  | 4 (6.56%)                                                                    | <b>5 (8.20%)</b>                                                                 |
| September 2014 | 165                                                        | 8 (4.85%)                                                                                  | 4 (2.42%)                                                                    | <b>12 (7.27%)</b>                                                                | 174                                                        | 3 (1.72%)                                                                                  | 5 (2.87%)                                                                    | <b>8 (4.60%)</b>                                                                 |
| October 2014   | 342                                                        | 49 (14.33%)                                                                                | 5 (1.46%)                                                                    | <b>54 (15.79%)</b>                                                               | 342                                                        | 38 (11.11%)                                                                                | 10 (2.92%)                                                                   | <b>48 (14.04%)</b>                                                               |
| November 2014  | 434                                                        | 28 (6.45%)                                                                                 | 13 (2.99%)                                                                   | <b>41 (9.45%)</b>                                                                | 715                                                        | 20 (2.80%)                                                                                 | 25 (3.50%)                                                                   | <b>45 (6.29%)</b>                                                                |
| December 2014  | 167                                                        | 0                                                                                          | 6 (3.59%)                                                                    | <b>6 (3.59%)</b>                                                                 | 620                                                        | 1 (0.16%)                                                                                  | 39 (6.29%)                                                                   | <b>40 (6.45%)</b>                                                                |
| January 2015   | 150                                                        | 5 (3.33%)                                                                                  | 3 (2.0%)                                                                     | <b>8 (5.33%)</b>                                                                 | 334                                                        | 36 (10.78%)                                                                                | 15 (4.49%)                                                                   | <b>51 (15.27%)</b>                                                               |
| February 2015  | 35                                                         | 12 (34.29%)                                                                                | 0                                                                            | 12 (34.29%)                                                                      | 134                                                        | 30 (22.39%)                                                                                | 9 (6.72%)                                                                    | <b>39 (29.10%)</b>                                                               |
| March 2015     | 23                                                         | 7 (30.43%)                                                                                 | 0                                                                            | 7 (30.43%)                                                                       | 71                                                         | 12 (16.90%)                                                                                | 2 (2.82%)                                                                    | <b>14 (19.72%)</b>                                                               |



**Table S6. The most recent common ancestors (TMRCA) for the 7 main sub-lineages and information on duration of circulation**

| <b>Lineage</b> | <b>Common ancestor location (probability)</b> | <b>TMRCA Median [Lo,Hi]</b>     | <b>Lineage length in years Median [Lo,Hi]</b> | <b>Lineage length in days Median [Lo,Hi]</b> |
|----------------|-----------------------------------------------|---------------------------------|-----------------------------------------------|----------------------------------------------|
| SL 3.1.1       | Kenema (72.5%)<br>WAR (20.7%)                 | 2014/08/06<br>[2014.53,2014.63] | 1.09 [1.05,1.15]                              | 396.26<br>[382.37,421.33]                    |
| SL 3.1.2       | WAR (69.9%)<br>WAU (27.7%)                    | 2014/08/03<br>[2014.55,2014.62] | 0.67 [0.65,0.71]                              | 246.34<br>[235.66,260.19]                    |
| SL 3.2.1       | Bombali (84.5%)<br>Kenema (27.7%)             | 2014/07/30<br>[2014.52,2014.62] | 0.71 [0.67,0.76]                              | 258.21<br>[244.04,278.98]                    |
| SL 3.2.2       | Kenema (97.2%)                                | 2014/07/23<br>[2014.50,2014.60] | 0.66 [0.62,0.72]                              | 240.83<br>[226.36,262.26]                    |
| SL 3.2.3       | Kenema (98.6%)                                | 2014/07/12<br>[2014.49,2014.57] | 0.36 [0.33,0.40]                              | 132.47<br>[118.63,147.16]                    |
| SL 3.2.4       | Kenema (87.9%)<br>WAR (11.7%)                 | 2014/07/16<br>[2014.48,2014.59] | 1.05 [1.00,1.11]                              | 383.27<br>[366.18,405.55]                    |
| SL 3.2.5       | Kenema (98.9%)                                | 2014/07/23<br>[2014.52,2014.60] | 1.13 [1.09,1.18]                              | 412.96<br>[398.29,431.02]                    |

**Table S7. Mutations defining the 7 sub-lineages of SL3**

| <b>Lineage</b> | <b>Defining mutation(s)</b> |
|----------------|-----------------------------|
| SL 3.1.1       | C18354T                     |
| SL 3.1.2       | A7148G; A17445G; C18162T    |
| SL 3.2.1       | G18240T                     |
| SL 3.2.2       | T16231C                     |
| SL 3.2.3       | A6726G; C15801T; T18081C    |
| SL 3.2.4       | T5849C                      |
| SL 3.2.5       | T3008C; T3011C              |

**Table S7. Mutations defining the 7 sub-lineages of SL3**

| <b>Lineage</b> | <b>Defining mutation(s)</b> |
|----------------|-----------------------------|
| SL 3.1.1       | C18354T                     |
| SL 3.1.2       | A7148G; A17445G; C18162T    |
| SL 3.2.1       | G18240T                     |
| SL 3.2.2       | T16231C                     |
| SL 3.2.3       | A6726G; C15801T; T18081C    |
| SL 3.2.4       | T5849C                      |
| SL 3.2.5       | T3008C; T3011C              |

**Table S6. The most recent common ancestors (TMRCA) for the 7 main sub-lineages and information on duration of circulation**

| <b>Lineage</b> | <b>Common ancestor location (probability)</b> | <b>TMRCA Median [Lo,Hi]</b>     | <b>Lineage length in years Median [Lo,Hi]</b> | <b>Lineage length in days Median [Lo,Hi]</b> |
|----------------|-----------------------------------------------|---------------------------------|-----------------------------------------------|----------------------------------------------|
| SL 3.1.1       | Kenema (72.5%)<br>WAR (20.7%)                 | 2014/08/06<br>[2014.53,2014.63] | 1.09 [1.05,1.15]                              | 396.26<br>[382.37,421.33]                    |
| SL 3.1.2       | WAR (69.9%)<br>WAU (27.7%)                    | 2014/08/03<br>[2014.55,2014.62] | 0.67 [0.65,0.71]                              | 246.34<br>[235.66,260.19]                    |
| SL 3.2.1       | Bombali (84.5%)<br>Kenema (27.7%)             | 2014/07/30<br>[2014.52,2014.62] | 0.71 [0.67,0.76]                              | 258.21<br>[244.04,278.98]                    |
| SL 3.2.2       | Kenema (97.2%)                                | 2014/07/23<br>[2014.50,2014.60] | 0.66 [0.62,0.72]                              | 240.83<br>[226.36,262.26]                    |
| SL 3.2.3       | Kenema (98.6%)                                | 2014/07/12<br>[2014.49,2014.57] | 0.36 [0.33,0.40]                              | 132.47<br>[118.63,147.16]                    |
| SL 3.2.4       | Kenema (87.9%)<br>WAR (11.7%)                 | 2014/07/16<br>[2014.48,2014.59] | 1.05 [1.00,1.11]                              | 383.27<br>[366.18,405.55]                    |
| SL 3.2.5       | Kenema (98.9%)                                | 2014/07/23<br>[2014.52,2014.60] | 1.13 [1.09,1.18]                              | 412.96<br>[398.29,431.02]                    |

**Table S7. Mutations defining the 7 sub-lineages of SL3**

| <b>Lineage</b> | <b>Defining mutation(s)</b> |
|----------------|-----------------------------|
| SL 3.1.1       | C18354T                     |
| SL 3.1.2       | A7148G; A17445G; C18162T    |
| SL 3.2.1       | G18240T                     |
| SL 3.2.2       | T16231C                     |
| SL 3.2.3       | A6726G; C15801T; T18081C    |
| SL 3.2.4       | T5849C                      |
| SL 3.2.5       | T3008C; T3011C              |
